# Supplementary material for: Genes associated with situs inversus in patients with primary ciliary dyskinesia are identified by the weighted gene correlation network analysis
Source: Research Square preprint supplement (doi:10.21203/rs.3.rs-1550476/v1), 2022-04-18
Supplement: Supplementary file 1 [file 1bfb9240035643d0b785006d.docx]

**Table S5.** **Electron microscopy (EM) observation of the outer dynein arm (ODA) and the inner dynein arm (IDA), nitric oxide (NO) measurements, and situs status in the 6 patients with PCD.**

| Patient # | EM | NO (ppb) | *Situs inversus* |
| --- | --- | --- | --- |
| 1 | ODA/IDA | 67.1/120.0/90.1/133/177 | – |
| 2 | Not determined | 188/481/137 | – |
| 3 | ODA/IDA | 25.5/33 | – |
| 4* | ODA/IDA | 75.6/59.9/116 | – |
| 5 | ODA/IDA | 626/669/687 | + |
| 6 | IDA | Not determined | + |

* having two *DNAH5*  mutations; ODA/IDA, lack of both outer and inner dynein arms; IDA, isolated lack of inner dynein arms; ppb, parts per billion.
