# Supplementary material for: Genes associated with situs inversus in patients with primary ciliary dyskinesia are identified by the weighted gene correlation network analysis
Source: Research Square preprint supplement (doi:10.21203/rs.3.rs-1550476/v1), 2022-04-18
Supplement: Supplementary file 2 [file 8116e65680dc126bad8d205a.xlsx]

## Sheet: Sheet1
Gene	Module	MM_R	MM_pvalue	GS_R	GS_pvalue
DBT	antiquewhite2	0.879842	1.52852e-05	0.638511	0.0104105
LOC389137	antiquewhite2	0.890092	8.7842e-06	0.640967	0.0100273
LOC654155	antiquewhite2	0.883581	1.25636e-05	0.74514	0.00143311
PSCD4	antiquewhite2	0.809308	0.000257201	0.651721	0.00847709
TRAPPC2L	orangered4	-0.869055	2.60149e-05	0.664285	0.00691075
RNF113A	antiquewhite2	0.865661	3.04612e-05	0.744153	0.00146574
TMED10	orangered4	0.831835	0.000120358	-0.636574	0.0107208
C14orf172	antiquewhite2	0.937628	2.4854e-07	0.635379	0.0109157
C14orf106	antiquewhite2	0.914299	1.85126e-06	0.629672	0.0118851
PHF23	antiquewhite2	0.921004	1.10836e-06	0.609978	0.0157529
DRG2	antiquewhite2	0.853171	5.26049e-05	0.614278	0.0148356
FLVCR1	antiquewhite2	0.832214	0.000118724	0.643902	0.00958394
NVL	antiquewhite2	0.827215	0.000141859	0.694611	0.00405637
LOC348262	antiquewhite2	0.824893	0.000153806	0.603807	0.0171452
ATG12	antiquewhite2	0.918063	1.39551e-06	0.628972	0.0120086
HADHA	antiquewhite2	0.876362	1.82429e-05	0.620985	0.0134876
PSMB3	antiquewhite2	0.827611	0.000139904	0.638531	0.0104074
PSMC3	antiquewhite2	0.917464	1.46092e-06	0.608891	0.0159915
AXUD1	antiquewhite2	0.839003	9.23536e-05	0.711569	0.00292894
RNMTL1	antiquewhite2	0.870325	2.44964e-05	0.750811	0.00125682
C12orf47	antiquewhite2	0.909482	2.61018e-06	0.605177	0.0168282
TUBA1C	orangered4	0.845627	7.14748e-05	-0.609813	0.015789
ALS2CR2	antiquewhite2	0.847164	6.72352e-05	0.610606	0.0156162
SETDB2	antiquewhite2	0.87057	2.42114e-05	0.618445	0.0139865
ATP5I	antiquewhite2	0.884813	1.17602e-05	0.682662	0.00503965
ZP3	antiquewhite2	0.809482	0.00025579	0.752586	0.0012054
HSZFP36	antiquewhite2	0.940294	1.88321e-07	0.614881	0.0147102
YIF1A	antiquewhite2	0.836358	0.000101981	0.604925	0.0168863
ILKAP	antiquewhite2	0.834585	0.000108889	0.603961	0.0171093
LITAF	antiquewhite2	-0.82438	0.000156548	-0.665932	0.00672359
ACADS	antiquewhite2	0.842278	8.14784e-05	0.705276	0.00331351
FAM98C	orangered4	-0.840679	8.66476e-05	0.661348	0.00725465
TRK1	antiquewhite2	0.806178	0.000283615	0.765531	0.000879467
ZNF593	antiquewhite2	0.923143	9.32144e-07	0.643056	0.00971013
LOC646723	orangered4	0.821207	0.00017445	-0.633871	0.0111657
C19orf21	antiquewhite2	0.941236	1.70223e-07	0.644209	0.00953845
C19orf12	antiquewhite2	0.861067	3.74668e-05	0.740245	0.00160086
TMEM120A	antiquewhite2	0.870307	2.45164e-05	0.655077	0.00803387
FOXRED1	antiquewhite2	0.873805	2.07061e-05	0.683692	0.00494818
ITPA	antiquewhite2	0.862214	3.56032e-05	0.688011	0.00457856
ZNF317	antiquewhite2	0.848086	6.47942e-05	0.73396	0.00183906
YBX2	antiquewhite2	0.843079	7.89896e-05	0.629882	0.0118484
ZNF217	orangered4	0.912632	2.08967e-06	-0.604388	0.0170102
EP300	orangered4	0.813976	0.000221575	-0.650969	0.00857893
NDUFV2	antiquewhite2	0.807826	0.000269442	0.626043	0.0125355
NDUFS3	antiquewhite2	0.809079	0.000259061	0.679751	0.00530563
ZNF175	antiquewhite2	0.856793	4.51333e-05	0.629224	0.0119639
ZNF140	antiquewhite2	0.897707	5.61345e-06	0.658838	0.00755901
GPS1	antiquewhite2	0.921497	1.06542e-06	0.714613	0.00275623
HIRIP3	antiquewhite2	0.876354	1.82506e-05	0.796446	0.000380277
GNB2L1	antiquewhite2	0.833077	0.000115063	0.811557	0.000239495
CERK	antiquewhite2	0.924237	8.51466e-07	0.670246	0.00625228
BRMS1	antiquewhite2	0.913827	1.91631e-06	0.674679	0.00579555
HDAC3	antiquewhite2	0.807001	0.000276465	0.617876	0.0141001
FAM44B	antiquewhite2	0.865227	3.10721e-05	0.603864	0.0171319
UBE2Q2	antiquewhite2	0.824191	0.000157573	0.669467	0.00633546
B3GNT2	orangered4	0.802609	0.000316397	-0.681839	0.00511377
ATP5A1	orangered4	0.890803	8.43603e-06	-0.61495	0.0146959
EIF4B	orangered4	0.849351	6.15645e-05	-0.628758	0.0120464
EIF3A	antiquewhite2	0.8336	0.000112889	0.620641	0.0135545
PPIE	antiquewhite2	-0.81305	0.000228299	-0.617774	0.0141206
LOC653610	antiquewhite2	0.800128	0.00034096	0.703095	0.00345584
KCTD9	antiquewhite2	0.846351	6.94513e-05	0.646216	0.00924513
NDUFB10	antiquewhite2	0.829849	0.000129249	0.720336	0.00245348
ACOX3	antiquewhite2	0.813019	0.00022853	0.62353	0.0130019
WIBG	antiquewhite2	0.85877	4.14393e-05	0.637297	0.0106041
PRDX2	orangered4	0.873188	2.13398e-05	-0.612256	0.0152617
SLC9A3R1	antiquewhite2	0.844171	7.56934e-05	0.626338	0.0124816
AMMECR1L	antiquewhite2	0.892576	7.61813e-06	0.635794	0.0108477
DIABLO	antiquewhite2	0.829402	0.000131318	0.635929	0.0108256
CCDC44	antiquewhite2	0.886472	1.0746e-05	0.670204	0.00625672
TSSC4	antiquewhite2	0.906602	3.177e-06	0.604017	0.0170964
NT5C	antiquewhite2	0.825442	0.000150906	0.712653	0.00286648
EZH1	antiquewhite2	0.870947	2.37794e-05	0.652653	0.00835209
C11orf80	antiquewhite2	0.858843	4.13085e-05	0.72684	0.00214246
C11orf24	antiquewhite2	0.900537	4.71072e-06	0.72875	0.00205738
LOC650832	antiquewhite2	0.938817	2.19931e-07	0.61112	0.015505
SDSL	antiquewhite2	0.804058	0.000302729	0.621633	0.0133626
PFKFB4	antiquewhite2	0.802352	0.000318875	0.70542	0.00330429
ARL2	antiquewhite2	0.841532	8.38583e-05	0.748195	0.00133582
GSDMDC1	antiquewhite2	0.84498	7.33263e-05	0.628859	0.0120285
ALDH18A1	antiquewhite2	0.815911	0.000208053	0.609912	0.0157675
UBE2M	antiquewhite2	0.897754	5.5973e-06	0.653326	0.00826275
CSNK1A1	orangered4	0.835037	0.000107092	-0.653272	0.0082699
FLAD1	antiquewhite2	0.894225	6.91792e-06	0.633617	0.0112083
CHMP4A	antiquewhite2	0.842284	8.14608e-05	0.63899	0.010335
DCTN4	antiquewhite2	0.836537	0.000101304	0.604375	0.0170133
