# Supplementary material for: Genes associated with situs inversus in patients with primary ciliary dyskinesia are identified by the weighted gene correlation network analysis
Source: Research Square preprint supplement (doi:10.21203/rs.3.rs-1550476/v1), 2022-04-18
Supplement: Supplementary file 3 [file ecfd9c2b7546545a43d451d4.xlsx]

## Sheet: GSE25186.matrix
Tag	GSM1289627	GSM1289628	GSM1289629	GSM1289630	GSM1289631	GSM1289632	GSM1289633	GSM1289634	GSM1289635	GSM1289636	GSM1289637	GSM1289638	GSM1289639	GSM1289640	GSM1289641
HTR4	-3.44999	-0.113713	-0.330044	6.9125	1.8543	1.73239	-1.06397	-3.01064	-2.23595	-1.54066	-2.41756	-2.61727	-3.17038	-1.98585	0.758113
FLJ22639	13.4967	-6.53316	7.37454	2.15348	0.561828	6.39882	0.230663	7.69469	11.4253	3.88801	11.8863	7.61891	22.2292	26.2801	7.48122
HTR6	8.04637	15.606	14.0168	14.4163	10.4504	5.93534	3.35244	-4.58966	-2.11533	-1.18362	1.04822	11.8507	-3.33516	-0.518026	0.627665
HTR7	1.50666	1.55399	1.29229	-1.8004	-0.312909	-4.97626	1.94216	-3.93577	-4.28893	-4.21359	-5.08487	-1.57272	-8.64967	-2.94527	-1.65264
BBX	268.182	247.424	202.69	239.209	85.5843	161.383	138.023	172.096	146.671	142.43	208.466	239.839	214.941	128.467	171.891
HIT-40	-0.243338	2.0651	-5.09126	-4.60277	2.23493	-0.355471	9.05067	-0.629136	11.2971	1.05465	0.461826	-0.957539	2.06693	-1.67976	0.196882
DHDH	8.57723	21.2787	13.5899	1.85272	-3.53515	18.5796	37.6844	41.9267	7.72394	15.2411	26.7154	16.3434	31.857	83.8211	41.9356
BCR	20.5418	15.2036	20.0982	9.72763	27.6925	30.8115	20.8699	8.77359	24.7147	21.4468	10.4887	17.491	13.3383	11.3385	7.5748
LOC402716	-2.82269	2.93838	6.22444	2.72922	-7.7904	8.25683	-8.02537	-2.51111	-3.33454	-2.32626	-5.10781	2.00523	2.07236	-4.20181	-1.93434
LOC402715	-0.0389323	-0.977	2.88588	12.368	27.1303	0.58974	8.7388	23.5911	14.4157	11.2993	6.04362	4.193	4.09998	6.76921	22.7361
COL13A1	4.61101	9.0197	11.3835	-2.0153	0.156123	33.8031	19.7132	-4.08968	2.26358	-4.58965	-0.758267	-2.23226	-0.690108	-2.22288	-4.09899
TARSL2	8.3509	11.397	13.4926	0.597979	2.9869	17.7385	9.18638	4.4742	4.68648	27.1284	8.85505	19.8897	15.1449	15.8708	9.92899
T	-0.179493	-1.44149	-2.99838	-3.0362	-0.724299	0.316455	-0.499136	-1.0834	-1.54138	-0.348824	-0.033716	-1.43322	-1.64999	-0.0481625	1.84415
GTF2IRD2B	54.1029	52.2066	42.2636	38.8097	69.1118	77.7422	41.8773	113.827	34.3489	65.4064	106.173	54.1226	79.6167	117.577	130.297
FLJ22662	489.805	435.422	438.759	319.478	317.021	501.687	148.616	365.003	225.697	439.781	295.369	518.061	428.914	420.58	371.089
GTF2IRD2P	47.5497	43.2247	42.5707	85.3905	31.4903	47.289	29.0156	16.8115	63.7461	51.284	38.6774	39.1421	33.1621	65.6773	21.1246
DHFR	2.87342	6.91266	0.571663	-4.31725	-0.489762	0.728233	9.54622	21.7428	6.57568	10.5333	12.8256	10.2249	9.66038	1.56218	12.1904
STRC	7.24251	10.3269	13.6404	0.810747	3.98061	11.2206	25.5808	9.20887	40.5438	23.4702	6.16137	15.0698	15.3264	11.0654	13.0326
STRN	22.8905	10.6588	17.2989	40.2425	23.5656	19.1931	11.4378	30.4181	21.4994	28.715	24.5992	28.2454	21.1189	19.3422	30.5621
LOC642408	-0.0364242	4.57896	-0.0379799	2.88772	0.582249	2.71912	2.24734	-5.62316	-1.06128	5.14191	-4.23608	0.188135	-4.32421	1.23159	-3.88491
LOC642403	10.3483	2.91008	-6.14034	5.85011	1.99396	-1.43233	-1.15051	5.74137	4.96664	8.23666	15.0659	10.3093	12.5831	11.4388	10.0076
LOC642405	-1.39138	5.66309	-2.03065	-3.88814	-3.42936	26.7459	7.36796	-4.3144	-1.85304	-3.95376	1.63366	6.36241	-6.53722	-8.95859	3.53704
BBC3	-2.07085	-0.545086	9.15776	-4.87051	-2.95579	10.8294	1.95238	-1.67946	-9.25806	-4.30096	-4.68295	3.2509	-2.80919	-3.03608	-1.41894
LOC392843	-2.52281	0.186942	-1.13405	1.07241	7.01467	2.85987	-3.79668	-2.67004	-4.38592	-2.07509	-2.79858	-1.69976	-0.382691	-1.65819	0.770759
MYBPC3	1.86975	4.93508	1.55774	4.10743	4.27177	2.45561	3.5322	6.66195	10.5463	12.3607	8.93935	7.02856	11.2151	33.3591	6.25352
MYBPC1	-0.622767	2.08715	-1.8787	1.65674	1.02384	1.1888	-1.15835	-1.96986	-1.80915	-4.0094	-1.13669	0.338943	-0.0821593	-0.950454	-1.44603
MYBPC2	4.49537	3.73115	-6.80572	-0.835859	-1.90597	-2.79735	1.4789	5.7606	0.924689	-7.28644	-1.42695	1.55423	-1.66314	4.37526	-0.517754
LOC389207	-8.72538	-1.67384	-1.86377	-2.25529	1.96739	0.614001	-9.42751	-1.25863	-1.89314	-0.230729	-7.64952	-7.23422	0.246873	1.40695	5.15939
FLJ20021	79.2381	106.45	109.716	128.546	42.8908	142.45	176.68	93.3139	102.237	133.94	117.428	86.6103	89.1602	168.238	129.606
LOC389203	18.7707	21.7573	19.9124	8.85151	11.8698	11.2184	12.1658	13.979	9.64005	8.74291	51.8483	20.901	18.1156	20.6406	14.1994
BGN	15.05	313.645	896.619	792.871	1401.61	2581.9	626.113	243.489	69.202	8.49332	270.323	218.002	288.651	112.442	142.815
CSN1S2A	-0.439799	1.01786	-2.94587	-0.846032	2.25377	11.8873	5.74849	3.8929	6.90845	4.22329	-0.047065	6.394	-1.1825	2.53752	1.7463
TMEFF1	6.24599	0.607711	7.5904	-1.36992	3.08096	5.1654	11.9828	15.8617	11.0973	3.48122	3.50724	4.01377	1.9793	4.77877	-4.24364
TMEFF2	4.36278	4.76682	-2.72617	-2.72051	3.0802	-3.8837	3.34739	-5.02058	-1.43243	-3.92116	-0.935393	-5.81735	-1.18693	-2.49528	-3.95758
LOC642423	12.5368	10.5407	6.57568	-1.06695	5.17265	8.49833	24.4018	7.93135	8.3509	14.75	9.91728	8.3509	16.958	9.15215	7.17643
LOC642425	-0.924804	-4.10242	-0.946232	15.8391	0.583651	-4.2953	-2.61963	5.932	-1.20381	1.77671	-2.82235	6.89695	-0.14623	11.4418	1.97038
LOC642424	1.049	-4.19305	-0.461056	-3.05171	1.98782	1.32556	9.5566	5.93803	-1.24579	2.28129	1.33516	-2.13001	2.73547	-3.25382	3.64717
LOC642426	3.34069	3.89067	4.63708	1.33728	-5.35081	-6.78953	4.19499	-3.93479	-10.3734	0.72464	2.87699	1.95238	-4.10495	-0.435917	1.97101
LOC642428	-0.925242	0.170264	-2.60352	5.14989	39.9256	7.19697	-2.04904	6.15572	7.92546	2.53993	6.33962	1.33065	6.68299	2.54467	6.22591
FLJ32011	4.262	0.216017	0.61577	15.6004	8.02274	10.8454	15.1338	3.80837	4.38717	4.27163	6.9068	1.41776	3.56458	6.23071	-2.05569
FLJ44006	-3.33901	1.39087	-0.634708	-1.17887	1.99218	4.28501	-2.86683	-2.51242	-3.11741	1.43224	-2.32788	1.00295	3.1791	0.460243	3.3492
FLJ44005	1.33115	-2.8419	1.63688	11.8401	8.3534	14.648	6.67349	3.56208	3.52061	6.02038	5.14301	1.7782	2.05597	12.1744	8.48741
LOC642432	5.48258	1.0096	-3.06145	-6.28182	2.7002	-2.1262	-2.61766	49.5876	11.5259	10.5413	15.2363	9.26468	10.0445	10.5738	8.75388
STX6	198.51	307.781	260.774	165.587	168.203	283.71	236.042	185.042	268.74	252.71	351.802	211.149	262.441	178.223	167.874
STX5	300.643	350.535	345.81	520.863	384.919	420.064	441.93	377.132	389.199	443.842	316.584	395.538	352.046	375.646	363.23
STX4	158.842	229.093	184.483	209.83	196.148	449.785	451.666	210.853	286.173	269.952	362.172	250.337	256.223	287.384	508.663
STX3	141.952	134.681	121.898	75.0919	109.838	138.858	208.158	92.3694	111.595	162.661	81.9765	157.662	107.627	73.555	133.766
STX2	254.736	82.097	204.552	198.314	262.257	27.8903	119.501	199.495	219.479	263.056	66.0557	296.733	234.398	247.477	53.4252
BID	29.2539	37.0291	21.1417	3.38682	11.2586	52.2848	38.0092	51.6531	19.8296	30.9713	37.0691	18.557	23.7081	37.075	64.4086
SPDEF	148.889	243.891	247.655	635.56	228.157	275.496	550.95	241.175	296.185	491.592	269.492	280.458	301.262	271.054	192.796
MBD3	33.2403	56.0162	32.1829	22.5514	27.5112	99.3917	115.49	61.2375	72.2067	37.965	34.8093	41.7135	41.2045	26.9383	96.9232
LOC642419	6.78786	1.00509	-2.09337	5.86661	2.71028	9.74429	2.24371	5.15771	2.69852	7.01979	2.73462	4.28417	0.145613	0.570916	12.1468
MBD4	574.993	595.72	533.232	955.921	616.399	755.907	1507.27	552.495	3813.16	971.66	484.545	531.28	1651.32	695.699	1077.29
MBD5	5.02838	5.56541	2.76038	3.90448	2.43922	8.12302	-1.01262	5.28955	7.98501	7.54623	13.8006	12.177	10.7987	11.8091	14.8467
MBD6	244.041	383.206	222.199	312.157	451.899	630.598	418.178	162.064	772.92	341.232	230.238	261.718	368.981	227.861	212.125
BIK	197.484	239.946	134.651	202.248	155.151	277.712	347.683	354.508	134.001	271.705	241.287	191.899	168.881	342.449	576.777
MBD1	42.9478	40.5799	52.6997	31.4258	51.6246	41.6317	7.32525	13.6101	32.2184	34.614	37.4926	34.6653	44.571	27.3724	41.6578
MBD2	6.98441	3.49201	5.61536	0.28557	5.73979	2.47439	-5.93982	0.351081	-3.10775	3.38592	8.45112	0.72411	0.0637285	-2.48391	-0.163936
LOC642412	-0.0353752	7.20713	6.35374	15.8405	1.98689	24.5853	10.8341	4.9566	7.73043	10.0699	6.03262	7.73805	10.4479	9.18904	4.24013
LOC642411	-0.035541	-2.60167	4.21626	8.95393	0.584325	11.2011	-1.15032	0.744911	-2.074	5.1204	4.97539	2.27907	-2.12833	1.55215	5.90297
LOC642414	-5.3632	8.57023	-0.458304	-1.06347	-5.33257	-0.220248	-0.537905	-1.57593	-2.04585	-6.19368	-6.50873	-1.26998	-8.41907	-2.95166	-3.25763
LOC642418	1.34451	-1.8818	5.47929	-1.06535	8.56851	6.35847	-7.10733	3.5105	7.01288	5.16815	4.93473	-0.643249	1.76595	0.180756	2.26535
LOC642420	7.74237	-5.12044	-5.38836	11.3797	0.583561	3.55494	1.32667	-0.0525205	0.92008	10.0109	1.87067	3.08295	-4.17795	2.72122	3.5184
PRKRIR	487.753	686.354	608.473	399.61	427.23	559.466	630.837	551.293	627.102	694.899	857.489	532.823	670.763	593.076	518.867
LOC257358	1.33011	0.61231	-1.85884	0.254311	-4.70183	0.736226	-0.67261	1.00059	1.13113	-1.25336	-1.41281	3.90487	1.74656	-1.38049	-2.06776
FBXO27	7.93311	0.258768	6.77302	6.03453	11.4243	6.39199	4.67258	0.179055	-0.647638	-1.16987	-0.653386	-4.21904	1.36914	0.90429	1.97118
FBXO28	122.727	116.41	116.766	37.1331	101.547	109.58	83.6664	118.417	111	131.558	125.282	134.549	117.168	146.833	141.094
FBXO25	5.33746	16.6997	3.3069	2.31918	0.827611	6.25802	7.69217	9.33697	12.751	13.7702	12.7138	9.86934	6.06292	16.6525	11.0063
LOC642447	10.0595	2.04768	8.23636	0.165434	20.0065	9.15006	3.57639	8.45641	5.4883	6.65308	17.6498	9.44028	13.171	8.23841	6.3887
FBXO24	1.03817	3.17188	0.576405	3.55717	4.92155	1.66942	4.49231	-0.967991	0.237386	-2.06014	-2.55096	-2.7552	2.34232	-1.01769	-2.35587
FBXO21	338.031	406.458	362.117	239.855	262.122	391.977	340.935	307.313	267.831	399.524	417.891	337.98	311.239	305.669	286.669
LOC642449	-0.0202497	15.0611	1.97881	8.94255	-2.05951	4.22619	-3.54702	-5.63472	-4.70926	-4.20873	-6.39883	-2.52783	-1.50463	-2.77958	0.561828
FBXO22	23.9443	19.4071	29.6358	5.60881	10.9698	18.9237	6.66395	10.4893	9.84292	14.1711	16.8238	17.406	16.111	7.64408	18.7661
FADS3	6.04342	-4.5779	2.87606	35.9142	-4.71981	-6.16578	5.48181	-5.11771	1.14916	-5.08114	2.73392	-0.619861	-1.6603	-5.03888	-10.0281
FADS2	2.72432	2.98138	4.36379	-0.464232	0.927913	4.19055	8.34211	-3.82816	-3.53466	-4.70314	0.728233	-5.09104	0.367305	-4.61263	-0.924804
LOC642450	-1.92081	5.27515	-4.70183	11.3828	8.47041	-6.77963	2.04713	4.96837	2.92835	12.1464	1.93889	2.88869	5.14349	4.96113	3.48499
MYBPHL	6.03189	-0.541721	9.45349	3.16169	0.164984	-2.79773	-10.3734	-9.82689	-9.54186	-6.82621	-5.46346	-0.019663	-6.28001	-9.68872	-3.46309
LOC642452	1.04797	-5.13569	4.21571	15.8402	-1.06422	10.8337	3.57211	5.14453	11.101	8.05419	10.2987	10.2115	16.0461	28.4044	11.0904
FNTA	255.381	291.565	327.71	200.554	240.429	226.941	141.248	253.668	150.674	220.351	320.694	247.161	230.086	253.837	257.43
FADS6	8.35673	8.05081	1.41508	-0.465672	-0.516603	6.13358	13.9917	-13.926	-4.40696	-5.29956	-6.1978	-5.40218	-2.9508	-2.82966	-2.82339
LOC642451	2.4634	2.9109	-3.05614	2.88869	-2.06147	-6.7832	2.04879	-0.143422	2.28519	4.10409	-2.22441	2.70476	-0.442375	6.24793	0.148309
LOC642453	1.33862	0.167781	5.48142	49.951	0.579791	1.3636	-5.71626	-0.839306	2.37557	1.31819	4.77239	3.36596	-0.254899	7.6026	-0.344479
FNTB	116.984	123.045	93.4886	158.538	124.4	134.564	138.69	71.8207	136.714	139.366	118.862	77.5974	95.4848	93.342	123.77
LOC400120	2.29588	-0.0451698	6.05434	-3.90884	-2.94646	10.2229	7.19729	4.21242	-2.13778	4.02991	9.35507	6.02915	6.24025	3.34012	2.26556
FADS1	29.0167	7.22058	40.4203	5.27174	6.26061	4.18725	4.27995	14.2858	8.01579	3.52927	6.26404	17.8412	19.73	16.9901	16.985
FBXO18	82.735	141.985	109.643	86.0717	125.4	209.832	312.051	128.557	189.606	165.824	121.803	125.818	138.49	141.841	174.458
LOC284988	104.06	82.1694	137.129	159.776	148.616	80.8129	125.682	362.256	205.686	320.514	247.655	254.915	288.16	337.648	173.437
STX8	158.018	179.69	124.806	60.8007	110.076	88.089	75.9737	123.652	61.7218	127.563	116.507	94.7005	130.756	152.619	185.556
FBXO16	54.1845	11.6804	28.0169	15.3952	11.4116	10.843	39.258	23.1956	19.3262	49.9781	11.409	24.9635	26.9367	43.1214	30.4372
STX7	53.8717	22.2174	46.9126	6.46665	29.6835	18.9449	22.9602	54.8625	15.5653	40.26	38.2919	54.5925	46.7882	68.4766	40.4105
FBXO17	5.08244	10.4737	7.48703	1.55182	11.5753	10.4906	6.16246	2.89893	4.00644	4.27463	2.63884	-0.714936	3.48636	3.215	10.5014
LOC642434	-0.0198906	2.90997	-2.09771	0.164984	1.98546	2.68547	2.86745	7.45699	3.3466	4.37323	8.02352	3.48387	5.15426	5.32178	6.37087
FBXO15	2511.04	906.625	1877.58	2259.07	2110.2	82.6767	1099.85	2361.56	1886.66	2102.98	726.167	3348.45	2511.04	3255.11	409.113
LOC642433	-0.0200282	2.04797	-0.946568	-2.94279	0.580165	-6.16524	-2.6181	-5.94436	1.1439	-2.11843	0.160822	1.03031	-2.12488	-0.637452	0.350959
FBXO10	0.743318	2.45589	3.22936	7.97917	-0.230275	-2.69867	1.6539	1.40866	2.18623	5.98976	3.99862	-7.86675	3.55702	2.70832	3.89262
FBXO11	232.621	259.849	271.034	182.56	236.892	170.322	237.805	226.739	221.074	240.92	225.504	293.008	235.602	232.166	168.631
LOC642439	-1.41002	-0.930057	0.912697	5.15797	5.2757	0.723172	-2.62211	15.1541	13.385	14.1176	6.35984	4.65236	-0.935642	16.2432	2.97663
MINPP1	33.8371	26.7787	26.4012	3.17217	-0.00515848	26.9509	10.2264	79.7292	29.1114	53.7411	52.8391	65.2636	50.8156	34.911	10.916
LOC642443	3.33109	-5.41502	-8.51076	2.88858	0.580472	-1.41502	2.04797	3.507	7.21719	9.44059	11.402	7.61458	7.01702	18.6871	6.46807
BLK	1.47188	1.85293	11.9794	-2.81288	-3.88662	2.97615	14.7569	4.24752	-2.71418	0.214812	2.2707	8.01935	19.7132	26.3062	4.24792
BLM	15.4959	9.26683	8.00826	0.637362	0.913288	24.0122	7.49	7.74923	5.89613	13.7483	35.1913	7.73198	20.3476	26.2969	23.1927
LOC284998	-3.95608	-5.07482	0.222331	8.59048	4.61838	5.74703	8.76003	-1.35298	0.162956	-4.10721	6.81262	-2.94852	-0.513757	1.22719	5.30886
IREB2	111.084	78.4535	53.3331	52.8247	17.1436	61.331	61.0684	105.667	64.2628	76.4336	102.38	86.9089	81.4877	73.6715	86.7921
FBXO47	-2.14845	-1.19897	-3.02824	-6.70359	1.05737	-3.57552	-4.65731	16.9785	2.77605	5.12645	-5.06898	1.4305	-0.950546	11.0655	-1.41073
LOC642468	5.93593	0.674715	5.99108	4.02529	0.32688	5.40304	25.4094	-3.42923	2.95274	1.83809	3.24241	4.50726	3.72612	2.47858	-0.0783413
FBXO46	63.7153	74.1531	72.4356	107.193	121.714	114.121	88.8277	47.233	97.8835	75.6897	55.5107	55.2082	68.0853	53.4272	64.3255
FBXO43	11.7868	-0.846579	-0.157993	18.2474	1.82136	7.04717	-0.940959	1.29024	-0.919678	4.52112	1.78791	2.10299	3.50973	3.07546	0.322165
FBXO44	5.75868	3.85931	1.74613	5.79419	0.626817	0.0425279	5.4378	-3.32659	0.863839	2.72064	-2.88307	0.818192	0.79312	2.24391	4.83762
FBXO41	8.32834	10.4479	8.03395	15.137	22.236	6.55462	4.68177	10.0205	11.8824	17.6432	15.3193	19.599	11.6044	17.8591	34.6941
FBXO42	3.91477	10.3337	13.289	-8.17543	10.532	15.3133	50.243	-1.26675	-11.7568	6.37201	-2.52597	-1.23435	-0.48749	-7.11924	0.186509
FBXO40	9.5442	-0.481322	-0.846528	-7.65128	-4.4864	-3.03429	-2.93774	5.32992	-5.61882	-3.67677	-6.82849	1.37727	-7.54687	-3.86727	-1.36817
LOC642471	-0.0192492	4.10409	-0.0429283	-1.06601	5.1429	1.65602	0.347616	-2.23983	-3.49874	-0.620494	-2.23868	-3.06842	2.02858	-1.15178	4.3818
LOC642473	-4.6909	-7.09378	-7.24845	-1.06579	-2.04489	-0.148182	1.32947	-2.22638	4.6666	-6.24604	3.91079	1.56323	-5.08167	1.7324	-0.933696
FAM90A8	0.641437	-1.20155	-0.632158	-3.66905	1.86139	-3.52868	0.211974	2.28877	0.826319	2.86765	0.222659	0.207754	1.73085	-0.642121	-2.82166
LOC642475	1.05408	-1.66232	-5.38217	-3.8858	1.98893	-0.148322	-2.62236	0.16304	-0.629525	-1.85551	-5.32751	-5.63674	-2.51681	-2.02435	3.50445
MBIP	39.2092	74.5568	50.6213	41.068	11.1118	34.1333	17.7017	93.6716	34.2916	39.4052	82.611	54.0027	53.2138	90.798	83.6882
LOC400145	9.55159	5.8426	5.12122	57.9439	10.0287	12.5633	5.19904	69.3739	35.8827	35.59	36.185	16.1163	19.9963	48.5429	63.7013
BMF	8.0875	13.9046	8.15988	-1.8532	5.39909	23.6572	8.72738	-0.367645	-0.404747	0.0305847	6.33338	4.34076	2.75141	0.455073	-0.892333
KIR2DL5B	-2.76316	1.91806	-1.62179	2.54638	-5.06407	3.94177	1.14532	-2.76727	-2.42575	-6.22125	-6.17026	-4.55816	-3.5618	0.484772	-4.51314
KIR2DL5A	-2.16688	0.361045	0.826417	-2.30045	-2.04306	-2.20895	3.86918	2.194	1.26595	0.309122	1.08886	-0.878349	-1.09825	0.810911	3.41527
HTR1E	11.084	14.1099	8.34978	2.96672	2.79476	5.93686	7.47642	4.66761	7.61419	0.258537	3.54898	11.0889	3.26001	-1.2527	5.84804
HTR1F	3.44415	1.63703	-3.05478	-5.10714	-7.277	-1.42749	16.8488	-0.924071	5.93007	-4.24312	0.905221	-3.86963	-7.99009	-5.85275	-1.76838
FBXO38	66.2856	87.3715	69.9492	92.8614	52.7995	76.4313	80.7609	85.1347	76.8286	97.5399	115.696	94.3914	97.0681	78.8494	91.305
STYX	-0.301876	-0.48362	0.0599553	1.5197	-2.84619	0.317369	1.08073	8.85427	-1.29405	2.35831	4.16805	2.33347	1.47277	6.19954	0.132824
HTR1D	-2.69874	0.561506	4.28685	1.05569	2.15495	2.72268	-3.66115	-0.459347	0.156171	1.32165	-0.834839	-2.70565	-0.506587	-6.2419	-2.77143
FBXO39	0.245302	-1.20718	-1.1409	19.324	11.3791	2.99643	2.25485	9.46214	0.734861	-1.65775	1.24783	1.15423	5.89659	5.11692	17.0007
LOC642456	12.5333	6.57364	-0.0422645	0.163927	-3.43446	-7.54054	5.92594	2.4572	1.02756	2.74586	11.6817	6.78483	10.5525	4.2079	0.0688802
FBXO36	45.0086	16.537	24.4039	4.60488	3.3451	2.24476	64.6677	-0.829409	-0.436229	6.02092	-2.78325	25.753	1.40114	9.66848	3.50322
HTR1A	0.636852	1.63784	7.2154	-3.9397	-1.18834	-3.83426	2.93816	0.585476	-1.2623	-2.07663	-2.7018	-1.93101	0.465848	0.924246	-1.68063
HTR1B	2.98561	-0.638625	-3.87142	-1.88933	-4.66623	-6.53848	-5.7283	-5.04342	-5.4078	-4.27155	-1.38713	-3.58066	-5.20995	-8.27549	-1.35403
FBXO34	500.863	474.748	360.912	446.257	345.283	499.632	296.219	306.929	255.86	562.114	516.182	488.757	388.477	388.306	376.947
FBXO32	64.3072	122.034	69.3254	60.3505	66.4363	157.217	63.9832	34.7088	60.4092	61.5002	121.564	40.357	68.4866	43.317	93.4161
BMX	-0.948791	0.079476	-2.49403	3.51928	4.89142	-0.0310726	5.94995	-0.274614	1.97263	0.617225	-0.215817	-2.6696	0.498722	-0.924104	-1.54057
FBXO33	235.308	256.74	251.286	187.597	181.375	177.787	211.153	221.64	263.984	287.17	229.365	274.994	256.894	217.794	178.912
FBXO30	23.9335	42.34	36.5328	13.8086	31.9772	32.5277	14.3625	29.0792	32.6483	61.1283	63.1031	42.3809	54.5351	47.793	43.9159
FAM90A1	18.2959	5.1891	17.767	11.0664	3.34837	15.8699	3.55389	10.8247	18.1054	1.00023	8.23069	23.026	0.819483	5.30168	4.59908
FBXO31	301.262	273.641	342.92	481.935	355.929	308.236	454.519	278.567	570.75	345.627	211.075	360.202	305.41	285.99	350.216
LOC642460	-3.44294	4.105	-5.38705	1.33819	0.581419	-3.09905	7.46583	0.257658	-2.51198	-0.0205276	1.36406	-2.00983	-0.959109	-2.13605	-2.03918
LOC642464	4.758	6.57469	4.96905	-3.10957	1.99055	-4.30509	1.32961	20.9835	11.4126	14.9309	6.57592	12.5483	6.33942	10.8189	6.38284
SEDLP	49.928	41.7254	41.9186	2.37841	42.7201	44.2415	12.8053	7.60629	12.1732	35.8852	74.4618	37.5008	43.6825	55.3732	60.4359
LOC642489	592.209	601.723	652.417	566.269	509.578	715.549	347.055	400.049	251.273	380.735	464.487	486.253	287.284	321.203	452.36
HTR2B	11.7555	15.6009	1.4028	21.8348	44.4048	42.8792	0.645685	12.4636	11.8575	8.33552	27.4988	27.2195	14.023	7.71362	53.2497
HTR2C	-1.59578	0.829758	1.21085	15.3031	-2.16134	5.14835	-2.18817	-0.723635	-0.325109	-2.11041	-0.561074	-4.92727	1.49722	-1.78352	0.0814155
PPWD1	110.518	76.9999	86.5237	99.9741	31.5753	43.7058	3.34241	77.3096	49.0318	42.488	93.5692	60.5365	96.4397	50.1676	71.8252
HTR2A	190.434	231.606	170.657	48.2375	144.331	132.97	111.164	115.583	120.659	94.8909	153.235	119.413	115.946	122.525	91.9187
LOC642497	-1.40931	4.10394	-6.12202	2.89348	33.2478	4.2223	0.34748	-6.15933	-0.0446686	-4.41373	-1.41774	1.73192	4.64764	-0.83345	-2.33647
BOC	5.85266	21.2726	11.6014	-2.80435	4.39597	-2.05354	7.50038	-1.22479	-1.6814	1.65949	5.90902	-6.82901	2.23232	-0.478323	-0.92719
LOC642490	4.66946	2.04583	1.41562	15.7661	-1.06495	-6.13985	5.87048	0.343888	7.01016	-6.40166	-7.70729	-3.57789	-1.41582	-2.22656	-3.90939
MBL2	2.91816	-3.90972	-3.87315	-0.254779	-4.78798	-0.666326	-3.93898	0.719591	-7.88422	7.36496	3.16424	0.62163	-7.62561	2.90334	9.82907
BOK	42.8688	72.3965	44.6028	110.444	105.555	180.362	162.879	58.4823	77.3289	107.873	85.9589	85.5971	57.3087	79.7538	149.443
SLC36A1	16.3482	16.038	7.38277	13.97	1.4242	16.537	-1.18607	10.2243	16.6987	19.7221	8.23012	18.1212	27.2342	11.3749	2.27162
LOC284948	-1.24767	-4.24312	-3.4557	5.92264	8.03045	7.82208	-5.44317	-0.472257	5.13723	4.11229	11.8299	4.18689	1.97945	5.75382	-0.345243
SLC36A3	0.96156	1.70031	-1.39422	-0.344724	-0.351	0.524026	10.6611	2.68021	-0.599307	-0.634801	0.583962	2.28722	2.29416	0.251476	-1.43673
SLC36A2	3.55753	-2.10324	-0.821353	13.9706	-0.230586	-2.06987	-2.93658	1.32191	-4.68235	0.33827	-2.77204	-5.30005	-2.72701	-7.71882	-4.70115
VPS13C	33.9954	20.9366	21.1783	12.8484	0.620655	14.2558	40.23	6.56166	51.6099	15.6444	12.4092	26.7512	29.9684	17.1708	13.9777
HTR3E	-5.45914	3.52745	-3.87242	-2.8393	-2.07258	-3.11048	1.42709	3.0865	-5.40035	3.81934	1.41703	-2.24342	-4.31279	1.85272	-4.21032
DHPS	251.612	285.004	240.47	316.933	297.933	329.549	321.451	263.007	298.808	274.165	212.875	254.045	215.752	351.628	308.916
VPS13D	8.54905	17.8894	9.69887	-1.21878	9.10893	26.1661	11.0849	9.56216	24.2872	29.9819	11.1777	8.14432	8.69482	6.20834	0.615104
VPS13A	16.9954	16.1862	14.6914	7.47108	-1.18202	8.13872	-0.383602	2.29279	14.9169	8.76538	18.2796	17.3767	15.9192	4.52076	0.813654
HTR3C	3.37663	2.96802	5.89008	12.0717	8.76712	-0.479711	3.35156	-5.09169	1.40804	3.92833	6.26703	-0.917658	2.01065	3.54571	11.7612
HTR3D	13.6609	5.0494	5.98783	0.624228	-0.931365	3.47904	-0.50946	5.63748	6.61484	3.30384	3.72408	5.45757	6.82995	5.60573	7.19079
VPS13B	1.41403	1.38782	1.79316	-1.94777	8.71942	-0.377436	-3.42787	3.51377	4.32191	-0.391377	1.28433	3.71657	0.352434	-0.494421	0.45989
LOC642477	-5.36298	4.59841	4.20957	0.164528	2.00508	11.7612	-2.62097	-0.00643614	-0.930057	4.92375	-5.20705	-3.51817	-4.1855	-0.222739	-2.73865
HTR3A	-0.728953	2.81248	0.605781	21.5934	8.21012	0.924737	0.394887	8.4572	2.96826	8.02369	6.09883	2.23667	6.0063	4.36788	7.0276
HTR3B	8.45693	8.00581	-2.03014	-8.26382	7.46769	8.96258	2.93912	-6.02875	-0.983267	-1.78229	-1.14537	-5.61382	1.38738	-2.09586	-10.984
RABGGTB	245.454	303.167	313.054	264.98	241.415	214.135	295.211	292.334	328.315	365.534	329.817	345.347	359.142	486.668	465.261
RABGGTA	19.221	13.2071	11.8489	-2.0478	33.7772	10.3881	5.44082	-2.43178	0.153018	2.65046	8.07496	2.56817	7.60198	0.623364	0.679868
LOC642480	-3.44397	-3.04478	-3.04379	38.1897	2.00322	1.36469	1.32979	3.65445	-4.61498	2.75454	3.64773	-1.65413	3.54002	-2.734	4.76721
C1D	10.585	2.0954	4.74894	4.31202	8.21172	1.57987	11.8331	2.29981	-0.09302	10.8448	6.97256	6.7198	6.91889	14.3804	4.95663
LOC642486	-3.44886	1.14536	4.94896	5.83676	12.5477	22.634	1.33031	5.30521	1.43749	2.28969	8.04666	7.48541	2.53831	9.53392	2.76796
BPI	2.23061	5.29776	-0.917831	-2.81051	1.13687	1.01439	-0.239718	2.00835	2.74952	2.86693	3.92481	1.39925	-0.617323	3.35264	-3.0505
C1S	1.98675	41.9908	47.2647	30.5356	74.1349	79.156	74.895	6.43185	4.8101	9.52966	33.0115	17.0512	34.2208	3.93167	34.8255
C1R	12.2272	19.9319	16.0108	20.6734	5.83552	7.94223	3.72354	4.7201	-0.369418	0.0753277	9.74692	7.38605	16.8826	1.96111	4.92929
IL2RG	-7.52484	3.55276	2.04288	4.36874	-5.32161	-7.87122	-0.654265	-1.16603	-1.20761	6.65627	4.94454	4.21478	9.36429	-0.834023	8.65937
SLC36A4	46.2933	29.4727	47.9614	38.5484	39.2351	30.419	157.859	93.5193	110.631	97.4646	42.3633	76.5594	80.4785	96.3337	56.6175
GPKOW	37.1977	41.2207	33.3384	0.245584	27.8017	45.012	55.6566	4.2795	21.1022	32.1758	25.3412	38.092	44.8519	27.9069	48.2459
LOC284964	2.24755	1.56642	0.221927	-1.92634	2.99058	0.741753	19.6922	7.74399	9.91364	12.7909	10.4205	8.49086	1.55394	3.36294	10.9123
HTR5A	0.0717275	3.52611	-6.97238	4.02807	-1.18674	2.7055	-2.71534	-2.22964	-2.23173	-4.63207	-2.78819	1.13142	-4.17938	-1.67665	2.22482
BRE	141.391	120.742	107.251	114.969	116.404	129.247	79.3588	92.9249	74.9351	117.86	119.71	86.1167	108.566	124.187	110.891
IL2RA	-5.39231	-3.20214	4.76053	-1.26856	-0.234947	1.57182	11.9769	-4.4094	-3.84216	-2.86428	-3.33781	-6.37496	-0.889027	-6.17796	-5.92225
IL2RB	66.6811	174.402	193.003	4.3684	54.333	71.7072	140.499	80.6601	129.436	18.9607	124.715	160.852	201.78	101.434	120.914
DKFZp779B1634	-0.443886	-8.00004	-1.92566	-8.62833	6.14602	0.747399	9.55807	0.448294	-2.86017	-2.69637	-1.4293	-3.74907	4.62404	0.825372	-3.92026
CDRT15	-1.35992	-1.20355	-8.99506	8.24305	5.11627	7.928	-3.47821	9.5321	6.1365	6.80244	3.47587	2.38014	5.91559	5.9265	5.90249
PEX26	7.42239	5.55603	7.06154	9.52881	8.52926	6.31636	4.34465	2.30201	2.88681	1.8252	0.450982	2.73319	-0.0299095	5.74272	3.2256
LGALS4	13.2947	11.444	15.139	13.9871	-1.77838	16.9882	6.79644	11.0954	4.46503	19.7311	8.4709	12.1505	1.04134	16.9738	4.76436
C4B	-0.257842	2.36552	-12.1282	10.5832	1.44977	-3.5849	3.33109	0.914023	6.78453	-2.75714	1.98488	5.27377	-0.533991	18.2902	-0.832634
HSPC105	22.4725	15.5929	12.5642	-6.49003	-2.06928	10.4196	11.2038	2.79237	4.38927	10.3163	16.2013	14.3339	15.4056	6.03769	4.94258
C4A	-0.466085	-3.82931	9.45118	5.30168	-8.60698	2.95513	4.5822	-7.88331	-11.4712	-8.38139	-8.73816	0.457214	-4.60371	-11.4354	-5.837
LGALS3	503.581	526.142	333.102	375.642	367.858	619.66	736.077	1561.55	600.029	1207.5	1056.08	835.517	722.503	1846.19	1246.41
LGALS2	0.445009	16.6286	3.34732	0.362678	-0.0384132	6.89964	43.6825	-1.41931	0.600562	-7.2495	-9.28487	-6.22502	2.96087	-3.85235	0.61759
LGALS1	115.09	179.497	313.364	204.581	329.274	623.635	213.236	152.301	66.0079	25.1481	301.981	95.4957	185.838	261.29	521.704
BSG	952.851	1012.85	1123.6	1582.65	1462.8	1808.24	1131.75	1038.11	1161.06	1153.04	829.913	1082.26	844.278	633.569	883.332
DKFZp686J0529	0.784453	-0.282831	1.16917	4.22876	2.14004	-0.153316	3.5639	-2.12949	0.530826	-1.56855	-3.84977	-2.02228	-2.36624	-1.27427	-0.179855
LOC727866	10.012	19.2967	5.66529	-0.0425494	16.2448	18.7639	11.3693	1.75548	2.28188	13.1781	2.88538	4.03241	7.72071	2.74468	6.78393
LGALS9	94.4513	83.0006	106.253	161.611	122.164	316.236	103.539	67.5198	90.1225	64.6266	96.0012	82.2186	68.1063	52.3312	226.389
LGALS8	125.941	121.521	118.418	73.77	97.6385	153.4	124.797	135.419	132.255	103.586	185.399	121.268	185.206	161.375	167.152
BSN	0.737261	6.79481	7.19201	2.04274	0.0697518	-5.30902	-3.82816	4.26128	12.5544	3.2604	14.3298	4.64028	24.3184	1.77751	3.56877
LGALS7	114.469	556.588	343.709	48.5628	97.6779	884.391	939.513	256.958	91.951	152.976	773.828	54.5012	124.593	128.795	696.134
HTR7P	-5.45054	-0.639083	6.24835	1.05513	-1.1862	-3.10705	1.42695	-5.32102	-4.69419	-2.81897	-3.0576	-9.64402	-8.1809	-5.08953	-3.43817
BTC	129.736	56.2389	81.151	193.353	106.033	29.1202	114.127	98.6766	171.779	115.381	49.0198	148.902	89.0841	93.3221	57.6227
MBL1P1	5.83148	8.96962	2.93273	33.2293	6.24782	12.1486	16.2285	14.2727	67.6136	11.8353	10.4605	13.9977	17.6382	12.4553	13.0058
CFDP1	155.189	145.898	126.069	220.547	312.773	94.7005	77.8588	89.3277	50.656	98.2818	77.2778	164.167	126.821	207.779	89.9563
BTD	74.79	81.9946	65.4991	33.6081	94.2808	60.5313	60.5365	40.062	70.2323	66.6811	67.8555	85.1528	41.2256	64.1617	24.9761
CRISPLD1	35.4537	13.884	22.5075	17.8464	55.6603	0.533232	14.2511	42.8439	18.7547	23.6036	12.7641	44.7011	16.2591	26.6531	11.3766
CRISPLD2	32.8177	45.7221	40.7401	13.6684	74.6809	86.6353	56.6747	7.45747	43.2118	11.2147	35.155	29.6031	26.2899	9.64556	10.8346
SUB1	257.879	306.738	283.459	200.599	220.056	164.661	258.572	352.746	295.053	340.34	142.413	351.191	329.274	471.697	378.219
BTK	26.0078	12.5606	9.03978	6.90148	-5.29348	4.21027	27.4006	-4.32704	2.74468	3.91692	15.2239	9.44931	23.6611	1.23683	29.0084
LOC400099	4.27122	3.89718	-2.42162	3.73479	-4.2554	12.2726	-0.668382	-0.504126	-4.61635	-6.80682	-5.13049	3.88954	2.98957	-0.0179789	-6.25941
LOC400095	0.482669	3.89204	5.13398	-3.91035	-4.25409	-2.956	-0.668288	-0.832478	2.54568	-0.675584	3.50313	-2.24789	3.36679	-2.52719	-0.513502
LOC284912	2.24788	0.739506	9.12944	2.76841	1.64298	-8.51527	12.8272	0.619284	-1.77246	0.146404	-4.64919	-8.02187	0.823285	6.66161	1.02422
LOC727837	4.39042	7.72462	-2.82284	4.47497	7.48008	2.05091	2.24508	6.81515	5.87333	-0.973479	2.25936	0.578758	3.2604	2.7337	4.6861
DHX8	30.0943	31.0133	24.8452	8.01333	10.8277	67.5311	113.747	8.34325	60.3954	50.926	24.0122	33.5075	29.4916	42.8574	49.4987
DHX9	32.2935	24.6764	26.2518	25.174	26.9543	20.9523	9.58527	14.7968	20.0998	18.9118	36.381	23.797	29.9105	13.4835	22.4218
NKAIN1	-4.20619	-1.06553	-4.61761	-2.32604	-5.30304	-1.68038	0.373026	2.70048	7.37329	0.571083	4.94098	-0.0552943	-0.932551	0.602646	2.75526
LOC390282	-8.96198	-0.033862	8.01367	0.330136	-6.14667	2.75795	3.90199	-4.19878	-6.02338	-6.29521	-2.04281	-5.20912	-12.2268	-0.271502	0.632947
NKAIN4	-0.23583	2.37369	-4.62001	2.94235	1.55939	5.19809	-1.06535	4.65818	-1.16703	-0.238768	1.05857	2.88511	-2.22932	6.14189	-4.6501
MC2R	-2.49437	-4.58301	-7.90951	-2.50725	-3.0487	-3.7497	5.8987	-2.24153	4.23502	-4.63829	-1.91123	1.99375	-8.77336	-3.52555	-6.93331
NKAIN3	5.31076	5.67184	3.91358	0.82503	-0.149292	12.9133	2.75295	3.64926	6.05633	5.89678	20.2523	3.64547	3.93488	5.15662	5.75587
RACGAP1	37.9194	30.7564	19.5262	8.64866	32.5067	75.0411	70.9914	23.1545	23.151	31.8172	70.0765	23.5835	31.5824	29.7329	91.5867
PRIM2A	8.30474	6.28304	10.9203	10.3385	1.11537	-1.42456	2.87474	7.72132	6.45354	10.1348	3.61949	3.09648	9.92883	5.36356	8.06047
BBS2	671.203	451.335	449.157	378.838	546.325	251.469	236.637	428.411	385.368	483.594	299.103	505.626	415.35	428.212	167.188
SLC10A4	5.08594	-0.670904	0.035899	-2.52829	1.3584	-1.38772	0.425501	-1.80584	5.08116	-1.30951	-7.38767	-3.8439	-0.28557	-1.45853	-2.73501
SLC10A5	5.93254	4.59336	8.75036	-4.6885	1.15384	-0.971696	-1.68575	2.02485	2.71693	1.41869	1.24912	6.36818	0.902864	4.59148	2.29309
BBS1	360.787	236.367	221.35	352.746	317.841	128.921	132.142	195.665	226.41	273.079	170.657	281.163	258.303	253.209	123.394
XBP1	3579.8	2774.03	4329.08	2205.88	2243.71	1384.26	1070.57	4073.51	2369.86	4907.66	2854.18	5121.83	4304.02	3676.11	2874.71
SLC10A6	1.23554	3.51249	-7.76769	2.2874	-1.43168	-0.971315	-2.78926	-5.09476	-9.45544	-1.16754	-3.59264	-2.75008	2.07127	-3.93122	-2.50141
SLC10A7	17.4722	19.5833	9.06786	7.1564	4.07452	6.90661	2.4172	0.751503	5.9031	19.5842	19.9931	18.6381	14.3689	8.58849	9.93939
LOC727848	11.6251	13.1975	1.68875	1.00511	1.85669	2.35411	0.148348	26.2285	11.8162	13.283	23.7701	8.9359	21.9744	9.9842	16.0364
LOC727849	9.85436	-0.005789	9.96222	36.2088	15.6456	6.28553	-0.236916	7.97124	2.8687	7.56395	2.28341	5.30057	1.55159	0.646579	0.53956
SLC10A1	7.38429	4.59403	1.72695	-6.3903	2.90486	-8.17452	-4.26009	-5.84618	6.0212	4.4688	-1.50076	-2.61434	-1.39555	-2.74527	-7.78758
SPDYC	-2.09415	4.76846	0.330751	-5.07438	-7.71563	-3.91673	8.35014	6.37718	19.1356	13.5109	4.65524	7.73405	11.8885	11.424	5.83083
SLC10A2	2.7548	8.00267	0.361698	-1.86233	-2.73084	3.73754	-2.78325	0.601161	9.46298	0.564802	2.73767	5.88623	-2.06892	5.31482	4.92311
SLC10A3	130.19	148.794	128.281	140.11	156.392	216.691	139.329	93.5477	86.3006	109.802	111.164	109.227	114.708	87.9299	151.492
PEX5L	-3.10905	-4.36981	-4.14675	0.906633	6.61414	-3.12781	-4.14314	-0.958313	1.02975	2.25215	-2.26636	0.31823	2.78891	1.25577	4.6434
MC1R	20.73	53.833	68.1021	60.4046	75.8311	74.29	161.626	7.61746	161.912	61.2965	12.1732	42.488	43.9185	19.427	55.3947
LOC727855	0.743193	9.81525	-0.518487	2.75766	11.3867	3.2509	-0.00643614	5.19147	9.0502	11.0786	2.90522	7.01847	8.47961	27.5136	8.56765
SPDYA	-2.08097	-2.78888	-2.03715	4.04614	2.28699	2.653	2.91881	-1.8034	-2.09701	-0.75354	1.36815	2.17542	-4.32214	-3.08331	-0.506275
LOC727851	2.35553	-4.20998	2.99947	-2.12323	-2.47168	3.78337	8.77036	1.5309	-4.08506	1.81436	-2.31145	4.29513	-3.89439	3.82011	2.4176
LOC727815	-0.870322	-2.847	1.09516	19.5539	6.69264	1.11365	2.08738	11.8285	11.5054	7.50704	3.90625	3.35833	5.30579	8.59547	7.78346
C8B	-0.351543	5.83352	-5.72013	23.9102	5.52277	0.202297	-5.84745	-2.07804	1.94838	-0.36803	-1.27355	-1.27032	1.85979	-3.04592	-0.361007
C8A	3.16752	-8.17503	-3.66645	16.4279	-0.224119	2.25677	-0.619615	1.42788	0.209552	-0.840644	-2.80152	1.33442	-5.34733	-0.472966	-5.31502
MC4R	-3.66818	1.95791	-1.35921	-4.25373	4.38202	1.33924	-2.50458	9.36615	2.06693	-0.942506	3.18047	1.86289	-0.487074	0.210753	1.95238
C8G	1.44227	5.51433	6.23766	2.71912	-7.65706	10.3457	2.74505	-0.983919	1.87181	1.47792	1.95338	1.73362	-3.86774	-2.71777	-1.43211
SUFU	1.3215	1.35631	2.90522	-11.327	-8.36718	16.5514	-2.22768	-6.50764	-7.11453	-4.56109	-1.21805	-6.53974	-8.1882	-5.35301	4.27714
BBS9	157.952	71.7026	143.127	107.514	118.954	20.8802	48.446	89.8104	55.3021	100.052	45.3176	126.937	74.4332	65.2692	28.2645
BBS7	49.785	28.7544	44.4908	42.6605	48.7902	17.2382	35.0045	28.4225	57.3713	58.5829	36.376	72.8577	43.531	51.7941	27.497
LOC727825	40.0491	26.753	46.85	101.725	89.4735	82.6669	75.0836	78.9281	69.9345	64.4475	37.6957	39.6586	38.7875	52.6443	48.9241
BBS5	36.1184	7.99446	10.2125	5.21352	20.8133	2.55834	9.98711	12.3854	19.4907	16.3183	5.14407	24.69	18.7564	13.3124	3.00324
BBS4	359.392	178.012	315.524	402.541	436.82	112.888	310.198	341.475	431.832	440.819	133.428	433.055	281.541	397.341	126.744
LOC727820	305.41	171.988	211.771	420.043	256.938	99.1421	390.976	494.271	336.831	268.182	145.514	318.893	379.941	437.753	335.589
PCYT1B	6.47535	-1.17366	9.9318	16.5067	8.74989	5.47314	6.89939	1.23801	15.4061	17.3336	5.83872	26.7112	7.48201	9.82317	2.14555
ZHX2	40.0685	53.4356	53.0626	30.3275	42.4564	95.8578	113.407	30.0225	79.2996	54.614	59.5335	47.7383	70.1883	68.1114	93.3606
ZHX3	33.5889	24.3184	23.9237	-4.66342	1.36046	29.6924	29.0119	-1.35786	13.2768	13.0925	8.21289	22.2283	18.5955	-4.26307	-2.77966
PCYT1A	8.23202	-0.26748	5.29604	-2.03971	-1.40918	16.2108	10.3437	-4.33253	1.74524	-1.90996	-4.57232	1.13129	-0.454992	-2.62455	-7.66886
CACYBP	61.3095	58.4978	59.9387	8.57964	21.8993	28.1917	13.2965	24.6415	17.7964	17.6581	66.4911	37.9993	42.7077	20.5736	28.6341
ZHX1	23.7904	13.3639	14.8534	3.31966	5.62089	20.5501	-0.0490437	2.68588	4.1898	1.97782	17.9907	6.7868	9.42171	0.315959	4.19943
MC3R	-0.467169	-3.8993	7.60837	4.22081	4.3818	-5.08304	-6.2318	-2.53247	-7.10392	-7.11254	-4.56266	-2.85782	1.33031	-2.8453	-0.0272641
RNF144B	165.151	187.249	191.379	65.6785	125.432	75.8114	61.6549	134.945	171.604	247.207	269.952	178.798	195.895	169.092	156.276
TAX1BP1	1964.14	1506.54	1816.83	1779.84	1761.09	1008.36	1102.83	1374.45	1402.99	1835.39	1192.51	2352.69	1633.57	1544.18	836.447
TAX1BP3	410.242	1019.19	509.578	308.458	514.046	1404.57	658.554	600.029	326.889	531.28	1306.07	337.289	811.219	722.503	1616.81
LOC727832	-7.70935	5.45329	0.202843	2.79103	2.44762	6.3848	6.15949	2.0936	1.28434	1.57401	-1.90639	4.13755	-0.707238	0.797033	4.38532
PEX16	223.469	186.799	198.688	262.258	254.466	289.632	352.418	284.296	292.182	278.471	240.79	235.253	222.782	366.094	347.067
PEX19	215.497	208.206	169.731	156.101	197.257	164.022	149.05	175.944	154.746	232.971	166.831	183.333	176.028	214.508	117.637
LOC727805	2.97463	8.93895	4.76846	2.7571	-0.475908	-0.473631	15.3147	-4.71238	-4.30574	3.37184	1.04768	-5.62286	3.37108	-5.63528	-0.273322
PEX10	8.35562	-4.54603	11.5829	2.72549	2.43263	3.33698	-0.620238	0.385681	-2.43569	4.24198	0.905606	2.11453	-1.82941	-3.6774	3.08472
PEX12	-2.33661	4.50773	6.73237	1.99659	-2.83123	-2.80041	0.510363	5.67105	1.75752	1.57739	5.19517	-1.40636	0.747855	4.78503	2.33854
PEX13	58.7739	53.6321	60.7256	42.982	53.927	47.187	37.2029	68.3379	38.4911	57.9589	76.6772	50.8811	51.6998	62.5846	75.6584
PEX14	231.101	129.711	255.613	526.142	260.271	147.193	120.41	215.027	271.136	178.896	105.688	319.112	217.053	248.09	171.779
MC5R	-7.00051	-4.58663	8.94277	-0.257842	-7.52585	5.90273	2.37809	-5.08066	-6.53848	-1.89749	-4.64591	-6.93331	-3.75193	-6.0266	-8.43661
LOC727811	-0.744505	-5.58167	2.64573	8.52221	14.5121	-2.1947	-0.838759	-1.56017	-3.49364	0.48931	-2.15889	-6.56703	-6.98112	-2.00319	-0.294237
INPPL1	249.178	322.609	187.2	443.224	371.089	630.213	482.537	214.417	696.499	365.095	278.896	381.753	334.327	416.81	372.211
LOC91561	8835.47	8508.55	8371.52	6492.03	7647.05	10701.6	11327	9132.57	6720.31	8387.92	9638.43	7275.07	9127.7	11441	11020.2
GCET2	10.0914	7.69486	9.21718	6.55042	0.031546	-1.54587	4.53532	-3.02893	-0.627375	-4.098	-3.06452	-4.07681	-0.762724	-4.01081	2.69342
IGF1R	19.4331	17.4941	23.7444	2.96217	7.00242	18.3785	0.636852	0.348751	31.8616	16.9678	-3.44654	25.3636	11.2971	3.47147	1.99856
FLJ34690	-3.74619	3.35602	-5.0273	-4.10074	0.567293	4.64174	-5.3887	4.65466	4.21272	-1.25378	3.16382	5.52205	2.03271	9.56716	1.55855
ENPP2	21.2942	8.23799	26.5319	2.45198	3.63927	5.41005	3.31959	-1.47692	1.81751	-6.1107	-0.922159	16.9837	41.4179	2.22771	3.9259
ENPP1	3.93296	8.74077	3.90774	8.33876	1.97748	4.84868	10.0273	4.59403	4.64656	1.02124	5.13582	9.36894	1.34562	4.97753	6.14588
ENPP4	425.742	224.073	479.955	244.486	396.438	79.6752	226.861	386.83	246.648	461.248	296.341	399.322	312.773	292.507	138.69
ENPP3	97.513	43.216	148.616	413.23	117.401	22.1357	72.3879	213.724	149.373	145.723	91.471	503.179	226.861	124.05	2.95642
ENPP6	3.92322	-6.84607	-2.74353	14.2919	1.02951	3.49566	-3.10598	6.04441	-1.18861	0.174683	4.9535	4.22721	8.75311	-0.957191	9.12455
ENPP5	363.962	124.05	236.81	360.393	247.424	19.71	238.977	178.431	187.225	206.091	73.4622	337.765	185.291	212.38	49.6092
ENPP7	0.465154	1.23679	-1.92464	5.49328	-2.58424	0.174718	6.49371	3.02216	-3.30278	-5.89719	-0.676231	-1.47458	-5.08651	-1.61554	-1.13319
HSPC171	192.576	224.852	222.094	259.882	249.178	405.858	360.787	292.681	234.457	189.278	214.618	199.034	154.041	226.189	346.903
DHDDS	72.725	71.3638	74.882	94.7509	99.4851	127.717	100.398	78.1933	111.068	112.099	86.5998	78.7947	92.3173	50.1108	120.025
C2orf3	-5.72066	6.65999	10.1392	4.62869	-3.8717	-3.54346	3.89262	-6.23721	-1.21648	-4.69453	-3.5849	-5.84362	-3.07424	-3.47485	1.35453
LOC390231	0.465544	1.55624	-3.47216	-4.63179	-6.13964	-2.84502	-2.71216	-6.18739	-3.88491	5.48444	-13.6386	-8.58864	-3.25538	-6.95655	-10.103
SUGT1P	3.73642	-2.32736	-4.87765	-2.71229	2.76738	-2.83226	3.90914	-8.62729	-2.02018	-5.11319	-4.59692	-7.98775	-3.52665	-0.265646	0.167546
LOC389217	7.6202	-7.88272	4.92022	-6.78953	1.96781	-1.21213	-0.96722	14.2968	-2.14299	4.20551	0.0683113	2.27242	-2.77785	-0.638241	-2.70347
HTRA3	4.11463	-8.9997	0.464746	-2.83055	-8.86756	5.90314	12.5836	0.602407	-1.85539	-4.62935	1.56673	-3.59183	-4.29109	-0.0618876	-2.70862
LOC150577	-0.041026	1.22208	-1.14644	-4.65953	-6.97667	4.48637	-2.7346	-5.05571	-2.24366	-0.0318766	0.72633	-4.56452	-11.5289	-6.81744	5.29674
HTRA4	1.64468	3.48642	3.27338	4.9572	4.34377	7.89886	7.19009	4.35787	4.27672	0.273968	1.24155	6.89665	1.91186	7.76492	-0.662942
HTRA1	113.551	213.236	245.923	128.802	153.447	374.562	287.744	188.074	146.399	82.9727	149.953	116.266	230.461	156.409	105.55
DAPP1	796.59	605.638	693.144	1206.65	953.124	739.961	1644.62	631.355	1725.26	762.376	429.013	910.58	1025.34	712.115	915.783
HTRA2	54.6571	35.1726	31.6756	11.8134	4.85842	42.0605	11.7096	5.83357	6.18177	10.8682	35.2014	33.074	21.4897	32.556	25.8802
FLJ44048	6.77354	13.9799	6.24562	9.44533	1.99173	-4.20847	-6.70232	-0.34171	11.2859	1.99807	-5.31271	5.32561	10.219	2.98456	-1.40059
LOC390205	43.6737	4.85199	33.2352	19.905	15.7589	4.47854	4.21027	1.86593	-0.635207	10.8391	-0.82337	1.6523	1.73461	7.59364	0.231593
IGF2R	489.163	915.76	559.466	574.618	547.589	878.506	1016.91	270.619	761.065	828.592	607.398	831.385	571.512	267.289	370.48
FLJ32065	4.67296	-10.6492	4.27262	15.5992	1.94753	7.60987	8.86247	-0.942911	-2.94919	-0.842019	-1.66454	0.347616	1.38013	-2.10009	-4.59276
LOC390211	4.27141	5.14156	8.01396	-2.12703	11.446	4.47789	2.04957	4.48109	0.589457	7.4741	1.73381	3.06932	5.48043	1.05054	2.24984
HSPC152	820.142	703.302	758.115	515.907	460.421	580.354	284.486	868.357	378.554	545.49	524.377	701.747	702.437	725.397	745.135
HSPC159	11.413	19.2936	16.324	-5.11114	-6.37854	16.2308	31.4884	12.9149	2.97207	17.7541	3.2509	9.03936	4.62745	7.71198	11.0764
FLJ44060	1.3321	-2.05734	5.91724	6.02915	1.99375	1.14274	3.5115	4.19341	-1.92375	2.88918	-0.472966	1.01715	0.596841	-2.50446	2.78775
CA1	-2.79594	3.33181	5.91847	5.18491	3.17001	0.185731	-3.50059	4.58387	5.5028	-4.18032	-2.51751	0.468956	2.88811	4.39042	0.157524
CA3	-2.68766	-1.08288	3.54298	-0.069374	0.061974	5.77273	0.284927	-1.59793	-0.458681	4.45667	-1.39998	-1.2694	0.0614647	-0.505583	0.444618
ZIC2	0.168	3.56961	4.26586	15.0631	12.5586	1.24609	-6.27076	7.17283	9.26663	3.93252	1.86593	4.38837	15.5925	4.62964	4.29021
ZIC3	7.10088	-4.5813	0.1478	1.44008	-7.24996	-0.0272641	-5.06533	-7.24529	-11.7347	-8.78322	-3.42326	-8.74143	-0.838893	-8.54722	-10.2001
CA2	2.39103	14.492	7.59691	8.98387	4.62524	5.2571	0.375314	4.8513	0.565925	18.8121	45.0019	15.0913	24.9033	49.9763	3.5987
ZIC1	3.90362	-3.0351	2.53817	3.50552	-5.35341	-5.45054	0.15169	-1.65583	-5.71897	-3.8837	-3.06905	-11.5398	-9.41754	-5.30196	-10.7095
CA4	4.95298	10.8302	5.1334	20.3466	17.3265	10.0663	12.1583	3.47436	5.6645	11.0928	4.35963	10.0378	3.90444	15.4152	8.76317
CA7	0.413642	0.474834	-0.434924	2.85272	1.6873	-0.31418	-0.54112	-2.03005	1.56744	-4.33987	-1.94155	-2.06061	-4.54287	-4.24589	-6.42441
CA6	8.76742	2.45766	13.3799	-6.69794	-0.341584	7.38399	23.8321	1.13853	-2.0031	1.644	1.0177	3.48317	2.00167	2.69701	-3.52711
CA9	4.95276	10.5718	18.0227	2.69146	5.49887	22.7183	13.9995	22.7299	23.5847	10.4409	16.9599	15.8816	10.3492	10.3416	4.97174
LOC389286	14.7703	15.312	19.3016	308.236	243.466	50.3796	62.894	96.5297	48.3369	45.3582	97.4945	51.0676	53.6378	76.7981	107.182
TMEM189-UBE2V1	43.0613	40.3831	39.1202	0.953434	37.6641	54.1802	4.53342	41.9729	15.3995	23.3485	25.8541	24.9334	24.6773	19.1575	17.4189
CA8	25.3597	18.4792	22.1051	-3.52321	36.5035	2.92256	33.9978	99.4062	78.2271	5.52306	13.2843	49.4156	39.8481	33.0229	3.34296
ATP6AP1	2819.65	2485.01	2504.33	3418.94	3382.48	2601.5	3961.56	2317.86	4713.49	3731.81	2234.05	4089.68	3012.8	2022.04	1471.07
ATP6AP2	1300.22	1530.87	1601.1	1058.65	1157.04	1143.01	610.42	765.273	857.489	1016.28	1489.07	1326.12	962.782	869.406	687.693
CAD	21.3667	39.3534	45.2491	5.12842	71.5884	116.12	81.5944	3.72873	71.4118	41.97	36.7291	22.8331	15.393	17.6602	33.9978
HUNK	8.85373	4.59738	-3.86461	-3.93898	2.025	-0.483273	-11.4456	2.77778	-4.19845	-2.94333	2.45359	5.32383	6.05781	0.256771	4.61661
CAT	453.408	240.556	331.205	211.198	284.459	137.49	106.668	225.57	264.279	270.376	400.117	506.713	209.962	331.7	87.281
SHANK3	70.754	67.3332	139.727	86.0355	100.625	183.83	121.275	75.555	116.953	75.7361	58.3173	72.938	76.0413	53.0204	51.3586
SHANK2	28.7395	20.6895	39.1991	50.7404	21.7683	6.40707	30.9172	11.6885	24.9293	29.5299	10.6555	47.5841	15.9277	12.9063	0.979429
LOC389293	38.9439	17.3441	34.2448	-0.743696	10.5333	7.62129	39.9256	158.018	28.4044	47.9668	96.7591	77.8659	63.3762	98.6766	63.0514
SHANK1	-8.9981	-1.66332	3.36972	1.31889	13.1851	-6.17597	6.34941	3.55346	7.36367	-4.5841	2.28539	-0.931381	-1.43022	7.70578	-2.77706
DAPL1	282.96	383.505	103.152	88.601	81.0653	212.38	303.047	183.178	152.301	105.079	352.502	61.0734	91.5131	290.524	273.118
LOC389257	-5.18178	-2.1944	0.55805	-2.76716	3.22829	6.45117	2.45305	1.27552	6.78842	6.67169	9.40188	-1.32583	5.428	7.05614	0.49208
C2orf7	113.723	69.1979	84.416	19.9064	61.7076	92.6575	108.826	106.029	48.6618	71.1292	78.2903	64.6717	43.9335	126.846	114.886
CBL	18.0718	23.4301	27.8492	13.9867	4.34379	27.7604	5.38562	3.99007	8.95458	16.8134	7.82023	14.8515	18.6956	-1.56952	3.94785
rab1c	-6.85985	2.95513	-2.15247	5.19252	2.15733	-2.61828	4.57058	-1.17948	-5.84653	-6.39446	-3.25901	-6.25655	-6.13477	-2.12238	-5.12216
SV2C	-3.43755	8.23069	0.464999	3.54426	1.40094	-6.85199	-2.86256	7.59875	9.66808	-1.35298	-0.0661102	4.19234	4.66009	3.33364	-2.95945
SV2B	12.0717	27.6121	16.2154	6.765	1.40057	-4.28673	13.7487	-1.92619	7.49526	1.97763	-1.19945	13.4059	-2.73438	-3.32735	0.635415
TBX22	-2.24751	-0.256258	-1.6619	7.26097	3.56768	1.80706	3.9658	6.79808	6.01511	1.93422	0.422698	1.99732	0.737658	5.3179	1.1311
CBS	11.8445	27.2219	18.4697	19.5967	76.196	45.3752	71.8207	34.1083	20.5396	31.5994	16.2151	3.52841	80.8408	31.462	66.1223
SV2A	4.47248	2.02239	9.66348	24.8676	2.76717	9.74677	5.19262	-0.361523	1.24544	6.1539	5.14919	-4.26201	18.2885	2.53117	-3.05826
TBX21	7.49632	24.9874	-0.0389323	-2.77763	-6.83272	-5.30196	6.2408	-0.939213	-3.89842	-1.58166	-6.38635	-1.87288	-10.0024	-7.45067	-10.1949
LOC390243	2.55732	-5.00438	0.292521	-0.929471	11.446	2.38223	0.235722	-0.598806	2.32135	-2.09034	-3.5213	-6.64891	-1.84022	-1.39196	-5.09452
TBX20	2.0658	-1.04793	-0.194148	-2.33555	0.603102	0.816567	-0.77796	0.856556	2.1538	1.44136	-0.0445342	-2.90578	3.94182	2.43447	3.68613
LOC389267	-0.655253	6.14246	-1.86497	-0.676243	-0.848601	3.46099	5.86172	3.52108	1.37312	3.90696	1.77671	-0.438638	-1.92249	2.79004	0.45876
CCK	5.16244	-1.06999	-6.52456	-11.7885	-3.75032	2.36552	-0.93579	1.73745	-5.29089	-3.03818	-3.66905	-5.32851	-5.20579	-6.28146	-0.271045
ZIC4	-8.36826	-3.03545	-6.81744	-6.98566	-0.821353	-0.979974	-6.25904	-0.987807	-2.14563	-3.33176	-0.356199	-1.36181	0.741849	0.331026	3.07388
ZIC5	-0.954975	3.5707	0.582689	9.93921	-3.82931	3.55446	-2.80234	-0.662763	-1.42253	-1.67709	2.73833	-0.148182	-0.530612	-1.58238	3.49588
SUOX	205.355	244.724	177.564	120.985	150.423	223.937	223.914	120.373	253.742	196.429	187.404	228.542	149.765	178.95	185.791
FLJ44076	-0.345651	5.84271	0.345306	11.8414	4.22177	7.58743	2.27127	1.01412	5.85572	3.17795	10.0361	-0.826229	0.727671	7.60837	6.24835
TBX19	10.17	10.9263	11.0653	20.7027	14.8636	17.4996	11.8495	11.2377	6.87704	14.0912	16.9118	11.2195	10.0179	9.95054	8.47066
TBX18	1.36069	0.673075	6.24038	2.09507	-0.297996	4.4234	10.9488	8.74961	-0.768239	3.68126	-1.06991	2.22664	0.537407	0.375018	7.00676
CD2	99.7642	115.946	411.222	134.918	102.242	114.162	123.954	126.623	222.67	34.0039	86.1996	277.46	118.561	239.582	412.661
TBX15	0.247219	18.7791	-0.947301	-4.69576	-5.3067	-3.67525	-0.0485489	5.32036	13.289	-1.3706	2.92388	-2.25074	-0.0651848	-7.26157	-1.77537
CCS	47.8507	55.2512	40.5661	25.0531	15.99	100.748	80.0396	37.4394	61.499	42.0972	55.7766	30.9195	44.2658	31.5453	64.1269
CD4	51.0311	26.288	17.7419	65.7668	55.4034	14.1917	17.0712	30.7377	39.559	37.3462	14.2019	63.6089	38.9688	34.1286	44.2027
CD6	73.186	41.8978	104.131	116.266	91.3863	114.484	206.429	47.5387	167.077	47.5155	53.6107	179.329	84.9562	111.307	168.238
CD5	12.5694	5.91847	17.23	15.0286	3.50372	18.3002	16.2497	-1.17134	-0.669422	4.19658	3.46045	18.4659	4.67279	4.62701	13.1717
TBX10	5.30521	-2.33393	-1.6629	1.14887	-2.0095	-4.48506	16.3457	-3.86744	4.38632	-7.54985	-1.06323	-0.643542	18.0146	1.97545	-5.31599
CD7	27.1399	26.9403	43.2185	58.3741	7.47778	87.1968	206.799	64.6583	81.499	8.23012	49.3028	130.884	104.208	95.4784	286.173
CD9	361.67	501.326	279.658	114.146	150.934	296.661	37.3359	228.376	93.3139	136.457	445.55	145.427	180.649	102.704	194.628
HSPC111	21.7516	31.1406	27.4108	17.767	13.171	63.7837	111.772	45.3514	34.6842	43.2226	59.1705	30.637	25.5383	41.2649	111.338
LOC390259	2.29135	1.55595	5.74671	0.329947	11.4455	6.38951	-0.671467	14.4963	9.16407	16.5526	3.93252	2.91037	1.33266	7.03253	3.34241
CDA	12.2798	21.1765	11.7533	19.9921	8.83739	4.28631	37.7066	6.6541	20.6236	18.0227	8.57643	34.8251	24.1131	27.5269	172.238
CLEC10A	1.36402	1.58637	2.35641	4.35381	11.0937	6.54982	16.6511	2.28721	8.4946	0.386522	5.17534	6.18402	2.27581	9.32125	12.0344
SCN11A	11.0655	4.28662	-3.43102	14.0159	-0.268414	-6.18604	1.73439	-1.43306	-2.8195	-2.69137	-6.82477	0.210213	-2.52438	-6.50598	0.152041
CLEC11A	34.7127	47.2723	20.6436	51.0753	4.96385	46.4638	36.1991	11.8522	27.5269	28.3026	12.577	12.1428	40.938	45.7405	22.9968
HUS1	-8.14882	6.81732	4.07552	-1.8984	2.89632	2.3783	11.9136	-5.32787	-3.92768	-5.00946	-9.37156	-5.45713	-1.62423	-2.04737	-5.28317
FLJ34503	8.49506	8.33189	-2.01726	-6.19368	-3.11498	-6.61477	2.8748	1.39396	-3.4905	-2.04607	-2.60318	3.52391	-3.0576	0.0737714	2.98333
CEL	333.854	74.4536	261.108	247.102	451.237	135.369	95.0073	462.44	362.687	141.94	105.005	78.9657	477.853	107.879	100.35
NUP93	350.541	272.944	248.831	221.35	282.446	376.127	286.494	258.731	364.29	270.323	464.127	232.971	204.471	238.126	255.217
BCAN	5.92854	3.02661	6.49694	4.69122	-0.971621	8.54342	0.698226	3.21885	6.74201	7.65863	4.49933	5.1294	7.50755	7.24991	16.6141
BCAM	8.51979	18.5406	26.4609	8.4671	31.9692	25.8607	22.186	17.9704	10.3048	12.3338	10.5291	5.66035	14.8168	3.47308	21.6819
SCN10A	0.189303	0.899367	-1.16484	1.35724	-9.78681	-4.27813	3.9388	-2.09034	2.28526	-1.92314	-2.11106	-6.83188	-7.24672	-4.29996	-3.91537
HECW2	43.5338	55.5834	54.915	67.7034	57.0694	78.9611	39.2753	9.17632	47.3984	54.8539	25.7548	37.3249	18.8863	19.7229	20.351
HECW1	-5.11598	-4.60631	-4.31476	-4.56765	-13.926	-6.93524	2.8752	-3.95003	-10.9523	-5.05025	-5.13077	-3.87824	-1.78026	-10.9926	-2.62263
SRFBP1	78.6203	53.6698	33.4329	4.93067	82.8441	65.6785	68.5187	100.25	68.692	54.8726	48.5656	61.0833	67.0446	54.9252	69.5874
NUP98	22.2528	11.7651	15.4234	0.363999	-0.812274	12.0655	10.5845	11.3289	3.00743	11.0531	13.8194	12.0713	9.40042	8.58022	7.03362
CFB	1190.2	484.907	1743.54	4407.69	3613.14	2227.92	2986.46	2195.63	2976.77	3156.33	1530.87	6784.72	3774.7	943.769	2970.86
CFD	554.232	469.703	732.258	101.471	237.552	171.077	223.176	697.222	133.976	141.087	62.933	129.595	201.935	253.475	247.993
LOC642509	7.74355	1.14482	-0.0552943	2.89479	-2.05093	6.35144	-1.05682	57.605	9.54987	7.49086	9.14692	7.00819	6.76159	5.94481	6.15239
CFH	107.912	153.6	194.566	52.8861	78.5169	86.4121	75.1409	105.628	70.3096	85.8971	155.425	89.6824	122.125	73.2998	103.652
FLJ22531	9.59695	11.4519	5.58746	9.33472	11.8248	14.0092	9.08677	7.60157	6.04669	6.70059	7.78824	4.06406	4.98699	15.4134	8.17014
DEADC1	5.28092	1.2329	5.12725	-2.0204	0.246873	-0.835175	-2.71596	0.614092	4.75662	4.77159	7.21097	1.13588	3.80916	9.35457	1.31836
CFI	21.4815	11.0833	34.7178	23.3858	47.2878	22.9947	19.8753	-1.42664	2.98574	6.80089	7.379	20.2653	26.6271	-1.86198	6.15424
LOC341112	8.83939	0.7222	6.22425	-3.93168	1.06399	-3.43503	-6.84221	-1.37967	-2.61324	5.52045	5.85266	-0.954706	10.9214	0.911505	0.196656
LOC642502	50.4507	20.0075	29.8508	15.7667	28.306	14.2734	9.92146	132.709	33.2384	74.0034	68.9714	68.9651	47.1802	69.5438	54.919
LOC642504	1.05465	-5.04475	-7.89894	5.32296	-2.04969	7.17184	5.66647	4.37309	-3.4193	0.630851	6.46938	-2.06436	0.555711	1.04634	-4.27548
CFP	18.2976	10.3062	5.59516	2.97933	6.901	8.86247	42.3702	22.8194	11.2052	8.21035	-0.0348775	35.3135	7.69689	15.0077	-2.23903
LOC642503	1.33904	8.67035	3.17205	2.89378	0.588365	0.7222	4.24149	-0.666051	-1.1462	0.33462	2.91025	1.98628	1.46692	1.75828	-3.47434
LOC642506	-4.69419	-2.5322	-8.42641	0.164623	8.46748	-2.13231	-2.62061	-4.87065	1.01144	-6.25115	-2.0294	-2.00707	1.95163	-0.51007	6.57404
LOC642505	-0.0214322	-11.7347	2.94851	5.83173	9.53591	-6.80215	3.89067	35.4808	8.4494	13.3704	16.1979	7.49697	10.4279	9.67505	16.2063
NUP85	218.49	196.303	189.032	142.701	158.36	263.984	192.992	208.712	245.533	209.716	246.648	197.508	160.98	142.628	296.219
NUP88	490.698	423.33	390.188	468.698	337.648	471.068	499.098	438.759	335.955	519.517	725.745	420.742	430.364	459.659	594.592
CGA	8.49243	3.55016	6.27175	-2.42113	0.206702	2.02943	5.85159	-0.272402	-4.18576	1.2439	-8.77467	0.158369	-12.2971	-11.2464	-1.65827
CGB	-5.3547	6.15481	2.25558	7.21626	17.7419	4.26355	-0.918957	3.18236	2.74053	5.27174	2.75045	2.76348	5.12823	-0.0562014	7.21507
C3orf18	9.03995	11.9047	0.651346	-3.33107	-6.37424	30.8495	2.24567	-1.41535	2.69074	-4.69906	-1.43075	5.51365	-2.95473	1.45019	-2.24481
C3orf19	146.589	280.333	244.731	136.845	171.779	359.12	243.489	253.067	281.733	314.748	291.577	223.374	231.736	336.724	261.958
C3orf17	24.5542	49.907	36.1793	3.63114	26.3721	45.1847	38.6717	8.24428	13.9098	26.7689	20.9547	16.3991	15.381	33.07	45.3279
MCAM	-2.61324	2.913	-0.476903	-5.636	-8.71038	6.79885	23.4003	-4.63221	-7.20258	-5.33857	-2.61418	-7.44565	-0.445153	-11.2445	-5.93402
C3orf10	644.197	570.14	531.28	333.102	417.721	281.329	407.657	469.325	291.753	458.149	561.91	283.326	254.348	689.603	457.313
CGN	1890.9	967.891	1203.03	1926.91	2002.74	877.988	1418.97	1030.33	2528.79	1928.4	1015.55	2601.5	1726.43	1157.69	602.581
C3orf14	263.251	252.6	156.327	98.2733	120.347	195.275	68.7886	263.716	78.9653	132.959	352.669	143.926	225.706	404.406	339.99
C3orf15	977.371	499.769	1088.39	1786.9	1493.28	97.0537	778.033	922.945	1957.43	1268.54	391.088	1721.99	1262.48	1043.07	226.381
MCAT	185.614	45.2155	91.0935	51.9419	94.4306	46.1324	13.1912	80.4294	47.4312	74.6542	39.6967	124.253	86.3224	70.2809	47.987
LOC149620	3.90892	1.15329	3.50095	3.07182	3.07948	-2.24203	2.37618	24.1137	10.3506	6.78715	11.2906	9.91087	15.3971	6.48119	16.9729
MOCS2	11.6131	15.6023	13.5851	3.15615	8.17292	2.42963	5.10423	16.8974	-1.88154	-0.432999	22.5108	13.7174	8.55712	16.4463	2.29722
MOCS3	16.352	9.36148	15.3959	0.741112	13.9811	10.3496	9.26343	27.8966	2.88525	37.522	23.5847	33.6104	12.8083	32.9224	15.5925
IL1F8	-5.21187	1.03072	1.58706	2.98322	0.907833	-3.44083	0.810872	-1.16997	3.35755	-1.95756	3.8733	1.26784	2.04035	-0.3511	0.435958
STON1	-9.41096	8.57929	0.453855	0.173145	-6.99994	3.5707	-4.21386	-2.75676	-4.69349	-2.78004	-0.946999	-6.99861	-4.10926	0.47998	1.77158
LOC642521	-7.76002	3.91557	-4.70165	8.46293	-5.35826	-6.77784	8.66049	3.44388	3.52194	-0.362999	2.46147	-1.23977	-2.82166	1.64218	-0.822114
IL1F9	4.56524	-3.53042	-4.6299	1.04187	-5.31717	6.78419	1.40447	1.03877	-2.01164	1.04976	0.571663	5.47473	-1.90996	-3.52942	-0.485656
CHM	65.6737	99.2191	93.8089	36.7912	69.1872	63.6194	83.1557	98.4361	93.4008	97.7487	131.821	89.1041	117.966	69.0119	84.4864
CHP	229.344	313.454	191.801	136.748	213.913	278.544	134.552	154.139	85.5971	153.447	205.346	127.855	90.4715	120.177	114.721
STON2	-1.92582	-1.40118	0.454037	24.861	1.38407	-6.97667	1.23591	3.33981	-0.272606	-2.80883	-1.17624	1.42356	-1.17186	-3.08551	-6.16825
LOC642528	-1.91817	2.28557	1.97545	-2.94961	15.3983	9.55099	7.3672	7.18356	3.50813	0.915722	0.241489	5.30012	1.13129	6.03453	-2.10324
LOC642527	-4.69246	0.156362	-2.10813	5.32883	-0.96322	1.34707	-2.00617	-0.54367	1.42709	-5.07438	-0.83729	-4.67769	-2.04371	-0.920483	-0.954326
MCEE	256.197	311.405	247.102	117.927	208.902	146.306	110.527	344.853	140.11	205.363	412.661	232.812	273.344	527.201	315.974
PJCG6	30.6456	22.5497	18.1273	4.0199	2.74468	13.1886	24.2991	11.2052	9.53829	34.9851	23.0233	37.9936	24.4111	30.3479	19.3309
LOC642530	-2.73553	4.03046	-4.70397	-3.09892	2.72332	4.23884	0.347289	13.0158	14.0205	19.7171	3.88954	9.45235	2.45964	11.7609	9.15748
RRP12	177.571	117.529	207.194	213.145	259.479	182.591	235.192	95.2055	226.762	271.828	88.3392	199.55	131.462	92.5795	112.076
CIC	65.0894	67.506	55.3693	74.6001	86.5383	156.409	85.9777	10.8378	91.3067	60.6183	52.2612	46.2955	78.8414	31.5994	39.3672
RRP15	152.798	150.317	149.749	103.598	178.896	191.58	337.451	247.138	131.913	191.978	254.54	174.77	236.123	186.716	310.198
ZIK1	10.8166	6.13943	15.0507	39.5709	12.4589	11.1035	33.6182	4.10638	13.1922	7.38202	22.5434	6.6889	15.0204	5.27797	2.87569
EDARADD	31.6101	40.5106	32.0429	41.7925	45.1929	66.4843	73.5921	39.2891	110.75	27.0416	64.8703	51.0083	69.7063	48.4668	64.5826
LOC642515	-0.925836	-7.00806	-0.0539261	-7.75057	5.29092	-4.30138	-7.9041	-4.22451	-1.28242	-4.24278	-7.08344	-5.3608	-5.08035	-0.362831	-9.68348
LOC642514	8.0296	0.168116	4.64028	-3.88554	15.4025	1.65949	5.67184	-7.6589	-4.20619	-2.74934	3.47605	2.96059	2.89335	-0.34709	0.821805
CIR	116.894	46.7577	65.2565	23.6607	59.4009	41.9542	24.2076	10.0707	35.8681	42.818	26.7183	74.6809	40.9435	86.1065	59.7446
LOC642516	-1.40955	0.650611	-0.218931	-9.43141	-2.05158	-9.89324	-2.04955	0.556297	-2.42518	1.74929	1.86528	4.37273	-0.616571	2.02608	2.9282
CIT	-3.43544	0.252359	-2.1044	-0.931091	-0.352409	-2.73944	7.93285	-4.24892	-5.72066	1.24711	-2.4242	-4.71217	0.921015	-3.5499	-1.65503
IL1F5	-2.20272	5.61505	0.152604	4.32107	-3.74779	2.39869	-0.65329	-5.01873	-3.13537	-4.25936	-8.01064	-6.08642	-1.68175	-3.05348	-4.91032
IL1F6	3.3508	0.167546	3.37424	-1.92619	0.357902	-1.91599	-3.94918	0.0697518	-11.5236	-9.40906	-3.10888	-7.7904	-6.51431	-3.92203	-2.50121
LOC642520	-6.53898	0.156171	-2.10534	-3.88632	-4.28543	-4.26232	11.5265	5.87598	6.47083	7.0087	11.2924	8.45275	3.5666	9.64937	3.16096
IL1F7	-0.0109645	2.63471	5.73935	6.05833	8.90899	8.21685	4.53322	3.5557	4.85154	0.573422	5.66925	8.29484	8.47683	-0.460954	13.8144
RCCD1	10.2577	18.7804	10.6797	5.66716	-1.78442	10.2365	5.87222	5.15345	7.54308	8.68013	11.2967	3.86658	2.09403	-1.19478	5.69887
MOCS1	22.1655	25.5494	20.1217	21.4659	17.5675	23.1437	46.7039	20.2094	23.9863	18.4762	26.0475	10.2222	17.5547	23.0788	16.0532
LOC642548	10.3069	9.93222	0.552076	1.33685	-2.04924	1.35663	-8.59441	6.24411	-0.251606	6.02432	-1.85719	-5.32305	0.331764	-3.49628	-0.504126
RASSF10	7.22326	0.0686155	-0.245415	5.27812	0.330751	8.75781	8.86163	5.91971	0.922884	6.37799	5.4999	8.95326	0.338087	6.89616	12.167
LOC642553	1.05285	1.146	4.94619	11.2859	-0.962598	4.23759	-2.61434	3.93908	4.47068	3.1672	4.68579	-3.09753	-1.20246	-1.42394	2.89649
CKB	741.428	353.352	798.511	765.273	1020.87	430.195	1044.36	621.984	984.909	977.371	333.265	611.26	464.487	842.425	505.74
PAIP2	450.808	331.395	504.829	377.865	416.303	129.451	130.16	432.609	262.588	344.646	338.069	377.402	431.793	420.989	286.449
ZIM2	-3.56482	-0.977103	-1.66104	24.6703	-9.64727	-0.0472954	5.27444	-0.475475	1.98857	-0.257433	0.636251	-6.28962	-0.492365	-0.466325	1.64899
ZIM3	5.85666	3.7231	-4.20353	-3.55122	0.582047	14.3092	0.0739617	-5.32751	-3.07155	-2.76449	-8.58618	-3.56564	-10.8276	-6.1772	-5.73163
PAIP1	11.5533	7.38021	1.28291	2.36062	8.55673	13.303	14.294	9.46618	3.48789	7.50654	9.79935	10.2174	5.70223	8.39614	3.60833
HIPK4	1.73024	-6.79313	-4.31653	6.80952	4.01132	-1.24479	-0.224119	-2.49738	4.02328	4.67037	5.20044	-1.18037	-0.848601	4.22329	0.612158
BCHE	-2.65049	-2.01883	-1.23925	15.2112	1.44361	3.08913	8.482	-0.798761	0.559562	1.59323	-1.19085	-0.638773	-6.07158	-0.295656	-1.43509
CKM	23.8296	8.01333	-0.259938	-2.22914	4.97174	0.253484	20.4707	49.9362	0.47034	5.31426	1.42455	24.4975	41.3433	17.6516	4.59082
MCF2	-4.10829	-3.89736	-2.03785	-4.24432	-5.04287	-5.09104	4.68447	-10.2958	-2.09691	-3.512	-2.85283	-0.747947	0.23747	-7.62651	-5.81582
MOCOS	55.4197	49.4959	158.639	72.201	182.023	104.617	199.698	119.714	264.112	137.888	130.017	17.3455	125.243	113.996	376.75
G0S2	9.27504	6.55383	1.77777	2.89968	0.451313	-0.0722547	7.84425	-2.95396	-6.11239	-2.49806	-0.451666	-3.53542	2.68972	1.03462	-0.644941
RRP1B	40.0534	35.3122	32.8248	34.1295	31.5679	13.3028	7.70195	39.4476	14.4194	21.1841	36.4606	34.9991	21.6388	18.9643	11.4151
HIPK1	0.655655	-1.19947	0.361261	1.06269	0.236423	4.7719	0.878331	-3.59825	-0.235459	-2.0931	-1.92793	-1.96875	-2.63306	-1.55044	-0.532093
LOC642537	5.47638	1.14664	1.40076	1.33644	2.00756	-3.10888	-9.82546	7.61545	11.1966	4.92454	10.5681	8.86484	10.0233	9.55204	6.37243
LOC642536	1.0519	11.5232	4.95074	5.32005	0.58806	1.65295	4.3847	4.19144	3.8873	2.05141	-1.86732	-0.0429283	-4.20685	-1.15288	-2.70767
LOC642539	2.45211	5.2912	1.98064	0.066566	12.5452	6.35164	2.03699	13.2838	4.18795	21.0039	16.5487	2.05377	14.2988	6.55977	22.1045
HIPK3	15.9561	3.34443	10.2281	8.94234	3.67071	-0.926642	1.13151	-0.190161	0.708161	5.64854	3.55667	8.7619	4.71479	4.06107	0.946653
LOC642538	-5.35921	-4.10547	-6.11845	1.33612	5.15685	-1.41223	-1.05731	1.06176	3.07746	-0.497468	8.57746	0.61078	5.92678	2.2455	4.37861
HIPK2	139.147	164.179	105.005	395.998	177.871	220.727	115.946	53.7465	274.207	203.142	89.4776	166.797	143.344	38.7532	35.4077
PIP3-E	20.2665	24.2076	17.7648	-1.14572	5.74671	21.486	25.3351	-8.40115	6.47347	5.28235	4.93253	17.7681	1.38018	4.11281	-1.35728
FOSB	88.9687	42.3586	14.302	16.0276	36.4606	267.945	212.82	111.302	51.6676	59.198	27.8904	27.7074	2841.71	584.403	81.499
CLC	1.14504	5.67089	-0.93289	9.67505	0.224455	5.29194	2.24664	-1.05604	-5.04614	0.447039	6.81222	6.23453	-0.0250269	5.3123	0.629954
LOC392713	10.4638	14.5699	15.8351	0.220624	1.00092	27.9257	-2.32809	4.67745	24.2902	5.87014	6.68358	7.18056	11.1966	6.91367	4.9556
MSX2P1	1.45429	-1.39625	6.67884	9.93049	4.92043	7.83343	0.783603	15.1285	7.93425	-2.13481	4.85614	4.23782	3.93306	2.94932	3.40334
LOC642566	-1.91885	-2.53247	-0.930057	1.33977	2.7241	-2.12895	-7.10561	2.00532	-0.364953	0.373835	-0.233761	2.95661	1.36698	4.67085	2.05026
LOC642568	-3.41211	-2.53163	-0.929487	-5.40648	-3.33427	3.54742	-2.61104	-11.3433	-1.15145	-3.54608	-3.09865	-6.85693	-6.82226	-0.473221	5.29032
CLU	-2.72665	4.50846	-0.418353	23.7956	-8.54178	-6.34027	0.171968	-2.38428	-0.187372	-5.31143	-8.3821	-6.38305	-5.18846	-2.56524	-5.68537
LOC642571	1.34094	-2.53091	2.96725	8.45533	2.72294	5.17511	-2.00344	21.839	-0.641833	5.26886	13.496	1.99801	8.85818	4.65718	4.02243
LOC642570	-3.41265	0.648447	2.96878	-3.89049	-5.85749	10.8343	33.3626	-3.07622	-2.61452	1.04055	-4.30957	-0.500347	-1.24401	-4.20792	-1.06569
LOC642573	-0.925407	0.155883	8.75883	11.2118	1.99839	-2.12938	-2.6122	8.57418	9.6549	8.25107	7.02653	10.2195	6.13001	10.0534	11.0632
LOC642574	5.4773	11.6096	6.26017	-6.29138	2.72268	-1.41163	6.765	2.28305	-8.69783	3.44492	-1.86114	-3.25781	2.22725	2.73691	-1.06553
LOC402665	-1.26339	2.2569	-1.76525	-5.54153	4.57537	4.21626	11.8438	-1.21302	3.18274	-2.93896	1.24793	-1.19197	1.02357	3.47753	0.898038
OIP5	30.4472	24.214	11.1547	11.8805	0.914242	39.4236	29.5421	36.4723	8.19153	16.5923	95.7864	12.5659	25.9056	39.644	125.324
DIO1	158.778	17.225	33.7176	42.6669	18.5003	-4.99268	21.2459	71.4464	28.3317	36.5189	9.63911	80.8843	70.8451	148	14.4761
DIO2	-3.90469	14.7303	15.3425	-1.31947	5.04494	14.2525	31.554	10.9553	1.24623	-2.03764	1.57895	3.06212	6.29754	-3.53044	4.52557
DIO3	-0.435917	6.91754	-1.06188	-2.104	-6.98265	-5.28676	-0.447611	-11.7934	-1.88422	-3.95397	-6.22542	-8.7284	1.44536	-2.50993	-7.23952
LOC642559	6.78204	6.6523	20.4489	38.7705	28.3032	13.3838	17.9291	1.35315	33.0422	14.2828	9.12331	17.4904	17.6511	2.00982	6.81222
FAM91A1	27.6228	13.0083	13.2825	-0.943567	24.1131	7.37717	15.8738	2.26462	10.5522	13.6651	12.5487	18.1276	16.2336	6.6778	8.75209
FAM91A2	0.396063	4.10511	-3.30505	0.803619	5.11043	0.493422	2.6716	11.2469	8.61687	10.5155	10.4888	9.94457	11.9258	12.4805	15.7547
LOC642558	2.25565	0.624787	-1.21768	1.34	1.2945	2.48153	-2.25894	6.72865	0.144657	4.49164	-1.26504	-2.5558	0.708304	-0.671297	-0.14997
MTNR1A	12.3623	0.465848	1.65243	6.76075	14.3281	13.9952	-5.03777	27.2263	6.90756	3.33109	7.5863	69.1979	15.1415	24.0411	18.4746
LOC642561	2.71577	-1.65884	5.52595	1.34066	5.26999	-4.25838	-4.94901	2.99669	6.68451	4.6111	1.05925	5.19031	0.556185	4.58308	0.249962
MTNR1B	-6.99334	-1.90049	-0.234237	-6.18702	-1.9279	-2.01851	-5.03858	1.94097	5.92734	-3.93673	1.78309	-5.03777	1.47818	2.38205	-1.16882
LOC642564	-1.40863	2.90937	2.94528	8.46507	5.26869	8.57023	2.03237	8.00984	5.75355	3.57452	3.72123	-3.57854	1.40936	-0.662403	-0.977995
LOC642563	2.71639	-3.04284	-0.0248639	5.32178	19.8753	-10.4644	3.8187	8.24811	9.66283	11.4135	7.92257	1.94943	2.72454	11.4156	11.9788
LOC402670	-2.82247	-2.75744	5.76035	1.22704	12.1749	1.4403	3.36387	1.76568	8.22359	24.0295	10.5712	3.57226	12.2042	7.92597	14.8449
LOC400019	-0.658313	6.13544	0.147411	0.223415	2.90807	-2.06305	-0.66865	3.56101	1.05911	1.43723	-8.26861	1.39396	-2.32664	-3.33012	-0.0515078
CNP	-2.81467	4.62462	-0.456954	4.56767	5.74865	2.98171	4.27028	-0.243923	0.460632	6.01993	-0.482533	7.60968	9.13944	1.13212	-2.78025
CNO	184.214	201.28	152.482	110.711	163.069	203.268	221.748	182.023	78.274	213.428	202.597	147.177	187.225	185.103	209.255
LOC402679	3.36934	-5.11281	8.9616	-2.49528	0.922884	-6.9973	-7.08412	3.53585	-1.66645	4.2746	1.93993	5.76137	-2.81512	4.39123	4.97982
LOC402677	12.1753	15.2311	17.001	-2.49367	8.00419	4.20799	16.9857	0.904727	-2.04545	6.02577	15.6749	7.46639	9.14454	18.4847	2.25953
LOC642588	4.68004	-1.666	-3.04683	-6.2903	-7.12355	-7.54121	-7.87796	1.64627	-0.98193	-4.66692	0.57651	-2.09638	0.228073	-2.95982	1.13766
LOC642587	-0.01735	2.29003	-3.04667	2.89199	-5.93581	-2.12955	5.75154	0.369715	1.47002	0.460901	0.354042	-3.67024	1.55872	4.64656	-1.22205
LOC642591	-5.3608	8.45014	9.91549	5.892	-5.83874	-2.11912	1.3286	-0.467795	-1.77424	2.97087	1.01906	5.32316	6.81412	6.79503	2.14646
LOC642592	7.75135	-10.3043	-0.928996	11.2151	-2.0749	-7.53938	-5.38462	-4.59018	0.47779	2.00861	-0.271382	-5.08751	-1.14435	-0.244141	2.7701
LOC642595	-2.73664	5.75333	0.568249	-7.87956	3.89372	2.54445	5.47981	-3.03471	2.04095	1.02657	-4.25476	-2.7808	7.57057	1.99563	-1.1778
LOC642594	8.2515	3.91499	5.67159	-3.88918	0.585476	6.24823	-0.984032	0.24	0.648802	3.1793	-1.38336	-3.46867	0.734661	-2.71624	-2.08608
LOC642597	2.65033	0.65008	2.71941	-2.70781	-1.41752	3.05421	6.7293	-2.74792	-3.52387	-5.13077	-4.0636	-7.25093	-4.64944	-6.28581	-8.82551
CD300LB	-8.2868	1.22503	-8.43661	-3.25287	11.1105	2.90918	6.8185	2.87979	-3.84621	0.5681	-3.57076	1.04797	2.68987	3.72902	2.22471
CD300LF	16.1194	10.343	9.46174	-0.232206	-0.241098	19.0668	45.2427	4.47609	31.8521	1.55542	15.4144	21.3921	25.9978	8.85215	25.3697
CD300LG	8.21745	6.20668	12.283	16.7072	2.44447	7.28302	9.48335	9.46043	4.48943	5.50153	3.16672	10.5265	4.17112	13.191	4.29145
MCL1	111.999	88.5056	71.0222	50.5617	53.9791	119.047	100.233	84.896	127.372	90.8326	93.7471	92.3781	126.956	80.7393	109.453
LOC343705	4.76813	6.23241	4.77306	1.31836	-4.60819	-2.07531	-2.14868	2.74754	4.67468	4.28148	1.55892	8.22103	-0.675099	-3.47948	5.83772
LOC400027	345.82	373.601	331.579	311.243	372.424	316.863	316.266	490.344	435.297	437.425	375.372	374.01	462.989	529.332	326.278
LOC642576	4.68527	-1.86497	-2.09947	30.3479	0.589011	4.23313	-5.38185	30.4311	2.99487	6.0175	7.61746	1.05762	0.359373	5.20082	4.39269
LOC642578	-0.0170621	-0.918145	-2.40778	-3.10781	-0.964213	5.17318	-2.00452	-1.23424	-7.45496	3.56129	2.70812	-4.20109	0.150018	2.23402	-0.258061
LOC642580	1.3848	-3.05071	-2.40818	-5.41128	8.65893	3.5449	-0.536717	2.87617	3.57474	-0.00643614	-0.629867	-3.86283	-0.0296738	-1.6683	2.98777
BCL9	144.745	106.668	136.854	232.185	245.828	116.514	158.353	81.9423	165.313	135.551	111.326	177.173	143.716	101.725	48.3553
UBOX5	8.4878	14.5761	11.1042	-5.40378	7.96358	13.6837	14.961	7.21458	12.3599	5.44945	5.10442	7.17379	7.05024	6.44243	8.14581
BCL8	2.75592	-0.529918	-0.0101443	-9.68578	1.32717	-2.14215	-4.29919	13.9995	2.99234	8.76506	1.37242	1.00482	5.28838	0.168116	2.90807
MCM3APAS	2.91966	0.456208	6.15221	4.21738	-5.03656	-2.69202	-1.17456	3.8873	7.92628	0.595178	4.38676	2.90774	3.46211	4.59411	1.41595
BCL6	852.917	955.479	911.234	1364.54	721.672	611.993	774.947	373.613	1736.83	945.378	662.042	670.513	823.436	423.185	322.221
LOC642583	2.53917	-1.66585	-2.40638	-0.00184147	0.585773	-8.38302	5.75031	-7.00604	-3.46183	-6.21739	-5.06366	-3.25665	-2.69324	-5.02287	0.186663
CPD	923.519	831.385	1091.93	991.045	1062.86	962.782	757.857	737.981	1271.61	1217.4	1115.44	1606.58	1143.01	527.249	264.902
BCL3	147.072	280.245	129.711	163.864	183.434	295.857	198.103	307.521	344.112	212.614	206.236	193.914	190.18	147.755	220.387
BCL2	25.1285	53.3729	67.2003	8.902	28.3586	27.3513	40.7678	34.4494	50.3066	25.642	38.3273	22.046	50.3945	15.8865	20.8988
CPE	46.5669	81.4877	85.2355	35.2042	57.0129	58.9943	72.8849	147.734	20.3493	46.0768	56.2452	24.485	56.2152	56.5224	18.2106
LOC402694	1770.46	2555.89	1903.97	1046.62	1631.67	2279.19	2721.23	2039.77	1262.48	1442.01	2728.62	1406.88	1760.53	2819.65	2992.39
LOC402693	-1.26361	3.65371	2.02806	5.92401	22.082	-2.95411	-2.04281	17.1413	20.9088	20.0375	18.8651	11.8438	14.7627	20.7447	34.206
CPM	13.9943	9.13712	8.60829	43.0172	25.436	15.718	11.9136	49.4479	13.8283	19.9957	30.6983	32.7673	15.961	33.9716	10.4438
LOC402617	-10.5968	2.25442	6.67571	15.0236	0.897671	-0.350425	2.77605	2.72137	-6.78266	-2.0308	-6.1411	-2.74134	2.75926	-3.83005	-2.50993
CPO	2.97275	3.36874	-0.362999	3.16537	-5.93314	5.51033	-0.641119	-1.89265	0.341412	-7.7818	-3.07452	-7.61786	-6.81876	-6.38018	-8.28241
MCM7	85.0801	186.907	131.406	92.4397	86.3769	326.366	229.261	81.4082	155.855	96.4465	238.732	87.9074	120.805	139.027	300.902
COL14A1	13.0058	2.23493	11.8407	7.70925	18.1219	7.19354	23.358	33.7717	18.1046	29.01	17.3005	11.1161	9.36642	27.4108	16.5463
MCM8	190.266	174.428	199.361	256.698	219.389	291.605	438.874	147.89	534.362	157.826	93.2692	138.303	279.075	189.476	217.512
CPZ	-0.792822	3.57995	-3.57162	8.23259	0.277953	0.301933	0.079329	0.692308	1.64408	5.8335	2.66371	5.95978	2.70488	3.1443	3.67815
CEP170L	2.7664	-2.22171	-1.78257	-1.43919	-1.66365	-0.655337	0.492252	0.542447	-0.539646	0.223623	-0.868225	-2.13895	-2.2404	1.78494	-0.171501
TCEB3C	-1.42713	2.14905	-7.70127	41.2207	-3.47792	-0.348489	3.45302	4.204	2.54522	3.93334	-0.495282	-2.03951	-2.75433	4.23464	-1.15501
TCEB3B	-2.81331	0.62	-1.58031	-4.71147	1.41408	-2.80757	-1.21465	6.40071	3.18156	-0.344726	-6.69295	-4.58434	-1.91207	-4.66776	-1.27212
OIT3	0.723517	6.03005	2.53491	-3.33826	-6.99946	-0.512743	-0.146621	-6.70439	-8.76029	-9.44962	-1.77174	-8.72386	-8.27348	-4.57726	-13.5493
DPRXP4	-1.27991	6.07931	8.27942	0.860309	22.4895	6.70084	5.20045	5.57638	18.7839	2.98018	9.12052	10.6097	4.20212	5.38698	8.39508
CR2	-0.237194	-2.81811	-7.0356	3.71241	2.9048	-3.15809	-0.588894	8.57447	2.96011	3.26416	3.90574	3.03895	29.0651	-0.382363	3.32576
CR1	-2.15517	-2.44363	-4.12123	-1.35858	0.306856	2.90893	1.70349	-0.87807	-3.03392	1.43746	-0.0297216	-0.325565	-0.900248	-0.29113	0.680197
GGPS1	201.597	233.746	203.692	148.918	144.194	133.133	92.0195	222.434	84.5965	182.681	158.046	159.2	155.143	224.287	172.646
SGIP1	4.77651	6.35144	5.90985	18.4804	-2.33155	11.2946	4.94934	2.92575	7.45411	4.23364	13.0903	11.1042	15.2332	2.86352	5.13819
DIS3	11.1089	10.3496	20.3528	16.9544	1.77261	8.22599	-3.83184	4.00933	6.26465	4.39544	31.8444	14.3175	6.0576	5.28392	4.36743
XCL2	15.4012	4.39544	-0.975333	-4.71564	2.37946	-2.74077	8.23901	-0.838622	0.737162	-0.343423	-2.76847	2.02987	1.13113	-0.36781	-7.454
MCM3	311.85	574.49	548.562	450.157	407.229	905.567	699.446	561.292	490.595	458.654	1254.63	477.974	566.592	461.954	975.498
CRH	0.477304	0.65152	3.09177	-2.13106	0.186383	7.46945	13.1922	-0.626678	5.12272	2.0297	3.46451	-1.66232	0.234931	-0.626516	4.18942
MCM4	88.1102	133.192	136.016	56.23	76.333	284.075	130.464	79.4352	73.5801	90.9111	188.938	91.9069	80.6763	83.1179	220.751
XCL1	-6.11081	-1.23096	-3.79097	3.1279	-3.70905	-1.63806	-4.38226	-2.5946	-3.14692	-4.96961	-2.69416	-2.34588	-0.258995	-1.17102	0.447987
MCM5	84.775	91.4646	78.5951	63.7013	49.1352	265.107	102.704	51.4028	53.833	32.8149	153.702	82.9727	95.4892	72.2386	189.092
MCM6	112.035	171.158	168.922	103.579	118.443	473.165	414.615	182.367	134.552	97.023	605.883	145.888	213.033	204.151	685.901
CRK	154.129	173.811	162.113	107.14	129.87	258.051	89.5301	186.327	117.703	121.815	171.875	122.314	148.913	102.002	140.714
MCM2	94.5167	75.5377	92.7561	241.693	152.798	230.493	155.406	96.0636	116.28	91.9071	163.98	90.2209	110.369	112.896	168.482
CRP	-0.437008	0.193764	1.38074	1.98312	65.5942	2.14695	-2.51465	10.4499	-0.260938	9.91624	-1.19321	7.46159	10.0326	20.9856	9.13496
LOC402635	-7.2176	-5.11198	15.0126	2.72766	2.94985	8.2518	-2.03841	-2.10245	-8.40811	-4.58264	-5.47119	2.70447	-0.452632	-6.29683	-6.99121
LOC402634	-2.82443	-9.08798	-0.23714	-3.91583	-8.73626	-2.95299	10.4205	-8.97088	-12.3044	-10.2001	-1.42437	-7.00806	-5.0342	0.609959	-6.18411
CRX	-4.48831	1.00269	2.89335	3.09124	-1.39731	-3.67788	5.12422	-3.08695	-8.54299	-2.24463	-3.05932	-5.54435	-1.6563	-1.37685	-0.944763
STOX2	283.875	315.179	235.745	499.364	267.289	352.339	627.693	119.798	548.73	266.172	169.516	181.275	302.433	122.792	158.256
IL21R	2.47216	0.978093	1.98279	-0.464868	-1.41149	-1.69418	4.35479	-1.5878	3.38882	1.01014	-3.03489	0.833961	0.00193735	4.86413	5.21432
LOC402643	-7.21443	-6.2318	-4.21247	-7.77902	-0.918145	-6.99664	-7.08486	4.36155	-0.532721	-3.53632	2.91929	-2.83467	-3.08041	1.9633	4.75644
LOC402641	2.37972	-1.78378	-1.06128	-0.640966	7.93365	0.589833	-2.69944	5.87217	2.79032	-4.5824	1.36742	-0.951622	1.36869	1.34905	4.25995
CSK	712.388	797.558	677.162	606.045	545.49	1545.11	1151.89	509.578	1172.14	961.865	1092.63	933.138	707.682	572.093	1027.25
BCO2	11.0907	7.46831	6.6905	-4.70782	3.33762	-11.4675	2.02239	-3.43263	15.6749	-4.27653	-0.95775	-2.78832	-0.534854	-4.59093	-5.33395
LBXCOR1	1.97748	8.56999	4.37526	-4.58694	-1.19585	10.5626	2.73068	0.736973	1.56323	-0.837706	0.550623	5.17276	3.50104	-2.93658	4.10546
STOX1	286.087	157.809	250.784	211.618	213.557	9.40214	50.2557	176.545	139.538	148.707	71.4597	225.672	161.608	201.797	104.326
SLC35A2	368.895	185.255	263.992	342.808	316.769	181.661	171.708	258.358	256.867	344.738	169.101	408.311	287.312	252.25	118.351
SLC35A1	572.093	586.295	668.996	415.987	449.873	267.48	403.316	474.046	576.242	810.613	496.265	694.554	556.841	647.293	317.058
SLC35A4	166.831	292.405	211.181	743.522	295.608	544.297	205.755	252.448	225.256	313.364	278.022	255.314	185.727	266.193	351.553
SLC35A3	688.618	678.69	652.644	659.942	442.801	276.303	464.333	597.505	563.317	709.207	499.895	918.219	764.468	662.553	406.979
LOC402644	40.609	80.1168	22.321	1.22719	-2.49777	52.5117	8.73789	131.422	29.3842	39.4476	175.34	113.041	101.422	90.3602	206.928
KBTBD11	49.9781	35.8731	38.665	7.20982	-1.67896	91.7459	63.6809	18.5617	33.2064	-4.6745	54.425	13.1839	109.802	25.6537	9.35712
KBTBD10	19.2488	10.7895	13.8437	7.98906	44.2918	4.84126	24.6586	1.3666	13.9865	8.96073	3.61652	11.1453	16.4459	10.6806	0.760681
ASXL1	54.3304	53.3278	68.5091	152.694	140.11	97.7875	101.616	20.2592	71.2311	56.2126	64.9703	61.2824	60.0382	40.4299	75.6311
MAB21L1	-8.78111	1.44184	-3.05546	-4.23727	11.0699	9.67708	9.12397	-4.59595	2.25352	-2.77958	-0.496132	-1.42664	2.45502	-6.85172	-4.28125
CTH	19.6856	1.95486	7.0341	-2.50133	17.0514	7.40535	0.663842	11.5575	9.44382	13.434	10.1204	16.4803	16.1807	6.26777	4.706
ASXL3	-2.69982	2.15435	0.233046	1.99736	-0.477476	3.73583	6.91843	8.56705	-1.41692	6.92221	-1.42664	-4.87572	-1.40604	6.24706	-0.359651
MAB21L2	4.51018	-0.689303	1.00326	-0.0313493	3.64681	-3.81455	0.983607	7.22757	0.696319	2.03203	1.98672	1.64586	4.70136	1.5365	2.65585
ASXL2	275.748	243.489	191.09	215.473	190.979	268.934	149.749	154.131	221.748	245.55	218.851	327.34	277.547	124.853	145.151
BCOR	53.6302	54.5361	76.8203	60.9742	36.7348	55.2451	29.4798	39.3174	67.6811	44.8571	48.388	70.3431	69.1964	48.784	13.2222
SLC35B3	581.744	342.286	512.656	314.414	461.471	229.093	288.376	438.333	303.047	406.502	369.387	556.588	457.607	464.127	276.303
SLC35B2	370.667	470.469	541.979	421.679	467.683	629.057	513.05	537.408	436.82	680.479	509.889	496.265	340.901	436.66	517.331
IL1RN	19.2633	62.3209	11.6521	39.9139	4.69733	87.2328	108.935	46.2589	16.5723	17.3702	42.0826	10.6185	22.693	15.8585	256.411
SLC35B4	10.5591	20.005	34.0226	-1.92053	12.8056	56.6552	44.8494	13.4795	25.5597	10.0187	33.7764	16.9358	15.7484	2.23939	15.0357
MGC33948	8.5919	2.90152	10.833	-0.521756	1.05054	6.0269	9.27456	15.0224	9.18554	11.1903	14.1056	10.653	15.1545	32.9359	7.46671
SLC35B1	584.403	614.333	688.929	541.367	625.389	611.696	494.604	711.915	384.27	739.367	576.494	453.856	484.421	571.073	733.149
IL23R	1.18891	-3.22866	-2.02683	3.40388	-2.49616	2.06391	-5.62301	0.0188335	0.553169	0.451462	1.11743	-0.119317	-0.578797	-0.889569	-2.33334
MGC45922	-1.28024	-2.21851	-2.31155	1.81329	2.658	2.15888	4.70236	-0.114509	2.40281	1.47489	2.01863	2.16322	2.43023	4.64005	5.44206
LOC727987	8.2257	9.26387	-0.525265	47.2652	10.429	16.9674	20.2685	-0.44347	-2.70386	1.4184	-0.0241241	-4.62092	-3.57231	0.342497	-6.8146
ARFIP2	7.57462	0.229683	-1.40238	6.24835	-0.83013	12.1861	-2.8424	-3.06653	-12.2971	-9.8818	-12.8472	-8.72538	-11.152	-0.482266	-6.26128
ARFIP1	103.708	94.9124	99.1045	104.155	78.1649	85.0586	43.5588	123.162	82.9013	118.602	117.494	109.006	101.425	76.0455	92.2437
SLC35A5	623.635	693.5	686.767	468.45	650.589	520.136	424.39	610.118	453.333	469.738	696.499	696.499	572.727	641.075	368.981
IL1R1	6.80851	15.0551	5.94318	0.218125	4.24113	-5.3289	11.3773	1.38866	-6.97746	-2.86096	-7.0052	-10.0163	-7.09502	-11.9771	3.5322
IL1R2	3.31297	79.7248	60.6721	25.0122	-0.770647	5.95174	35.3066	-1.18465	-4.80104	9.61764	12.127	-5.49971	12.0095	4.42314	15.865
SLC35C2	61.9751	67.9624	70.464	102.316	74.909	128.191	152.392	65.9857	93.4526	68.8284	55.2086	56.5708	57.4865	85.1286	83.348
SLC35C1	112.624	191.683	139.636	27.8186	139.373	403.938	221.64	173.198	153.743	217.053	167.159	179.823	193.249	104.036	235.489
LOC390192	2.29176	2.24532	9.45503	2.7757	-0.846987	0.815628	29.5743	-0.454255	-0.144428	-2.74501	-1.76344	0.225079	2.04938	-4.61023	-0.527209
LOC727992	13.1938	4.23739	0.210828	4.47248	7.47696	-0.463046	3.72485	0.241744	1.98506	-3.42234	4.97718	0.151307	3.73771	1.97788	6.7882
IL23A	10.6669	10.2281	5.92481	-1.91542	2.87903	15.4909	11.8417	32.8149	-0.489521	6.763	3.16768	20.4312	3.46484	12.1411	21.3872
LOC727994	-0.248	6.26438	1.24205	1.44251	2.95364	7.69604	5.16486	0.592457	-2.51273	-3.82881	-2.42387	10.0129	-0.0392377	12.1927	-0.484104
LOC727958	-0.51099	1.94788	-3.56686	16.5564	1.94682	0.647591	-1.24853	7.0174	11.1069	-3.93428	0.738216	4.38382	1.86188	-1.77617	-0.962496
SLC35D1	5.50625	-5.81777	7.57016	4.94212	-2.78252	1.94516	3.90487	22.6294	6.66943	9.93521	7.46291	4.76239	6.25765	6.56531	7.57759
SH2D2A	2.05843	2.22933	3.36369	0.252616	2.79365	10.4625	-1.67425	15.0266	13.3009	10.4259	-1.65645	11.4517	6.9052	28.7775	14.0171
SLC35D3	16.3549	22.227	7.37717	-8.35612	1.42407	1.05613	-5.29664	0.370835	3.16685	2.7701	-3.03409	-1.15894	1.23602	9.13695	1.33924
SLC35D2	148.616	124.292	111.316	142.44	95.025	203.932	170.97	99.1834	140.482	105.369	118.251	154.782	89.9276	193.605	138.858
MT1JP	4.48819	-1.88645	-1.38744	-2.53358	3.07799	4.21963	-8.36494	5.47743	7.58971	6.78483	6.91592	4.10623	7.74807	4.28285	17.3064
XCR1	-0.0393183	5.02453	2.49053	12.9111	7.69049	8.48552	5.25249	4.90334	13.4962	-1.51773	1.97105	2.70153	2.08577	2.48756	-0.316109
SLC35E2	-2.61337	-1.36769	7.38017	-3.49388	2.8894	7.69658	0.185731	-4.28845	12.7942	2.69832	3.25645	-0.449435	8.86296	4.26325	2.69701
SLC35E1	265.12	238.5	369.588	483.537	404.32	442.492	510.084	352.867	1046.58	311.843	250.68	281.334	494.335	190.057	438.513
SLC35E4	11.4531	12.5707	8.1327	2.69743	-0.235249	1.05676	-1.18579	6.3572	-1.25538	2.23623	3.35224	4.92826	5.93417	1.04494	1.5506
SLC35E3	358.066	320.088	415.238	306.385	310.354	231.736	288.461	355.554	384.68	370.48	417.391	354.29	358.324	298.72	206.21
SH2D1A	24.2931	18.6896	20.9856	6.13528	17.3542	22.9095	7.62357	19.6922	7.49126	10.4405	8.95637	32.6039	10.0657	33.3212	11.2882
SH2D1B	3.54299	11.8701	6.65106	-2.25276	-2.40617	8.2483	21.6388	4.59795	1.47881	2.91383	-0.83345	-0.0344643	0.825684	-0.0577904	4.92877
LOC221442	18.4741	33.8371	48.4592	5.49345	60.7094	19.2049	4.48215	28.7514	75.7199	35.317	8.01645	18.2959	35.8681	34.2189	16.2487
LOC389199	-6.41396	3.81553	-1.86411	1.25004	10.5413	-2.86382	-0.967404	8.44042	3.81001	3.56101	5.47837	5.89678	11.8772	9.19155	4.37064
SLC35F3	11.8196	1.97154	1.53799	-0.34403	-3.65815	-2.7123	3.26387	-1.65834	-0.119585	-3.37502	1.63523	0.615409	-2.14914	-1.4136	-1.42155
LOC727937	-0.248412	3.33521	-0.520091	1.44434	5.94004	2.05542	3.72249	16.5347	7.46671	7.20062	2.924	5.31788	9.81747	3.8929	9.34729
SLC35F2	22.5493	64.94	66.4946	8.3392	8.10875	30.9672	30.2599	9.95493	3.5061	25.391	59.1544	13.6475	51.3907	8.53679	29.4198
CAB39L	22.0785	25.8015	14.6911	4.66995	23.1724	17.8876	29.9135	26.3471	16.2202	20.7519	42.8807	20.3475	21.3253	28.145	23.8858
SLC35F5	158.36	128.281	116.733	89.1602	42.8734	49.951	14.3164	173.801	36.845	83.5072	76.1842	116.292	94.5167	58.2516	74.6066
SLC35F4	5.9222	-1.36753	-2.77407	7.45972	-1.66406	2.78692	0.90635	5.28668	5.32883	-0.0275403	1.24814	-1.14657	2.06667	-0.476314	2.8873
SLC35F1	2.00996	1.37507	-3.26006	-2.51053	5.15858	1.94753	2.70842	-7.35544	-2.72369	-3.25554	-3.75081	-1.24223	-10.0218	-2.79735	1.9895
SIPA1L2	86.0054	243.723	142.072	88.4927	150.489	251.766	226.046	84.4283	254.773	206.635	256.958	120.41	229.875	100.943	207.31
SIPA1L3	26.3078	41.2156	30.4405	103.588	123.965	69.1979	66.0211	24.5001	12.282	24.8527	8.48274	25.5508	8.3534	4.60488	32.0451
IL28A	3.08295	1.22565	0.258407	9.14454	-2.51751	-2.01701	-4.62193	0.588242	4.25517	-0.256523	-0.00793024	0.623875	-0.52535	0.26018	-3.52321
IL28B	-3.86127	-6.51389	-7.91566	-6.80385	11.3764	6.01869	7.48032	0.16355	-6.85199	-2.12814	-0.364953	-0.0627274	-1.28289	-1.24652	-5.8611
SIPA1L1	13.2734	12.1656	11.8514	11.4326	8.94316	13.2942	10.0364	-3.84565	-0.246787	-1.35642	1.9396	13.4783	-0.00737303	-5.09476	8.00469
LOC727944	6.89065	-2.32796	2.76686	2.76391	20.0102	6.91824	29.7101	-0.513237	-0.649485	-3.74892	-6.70306	-0.648293	1.39022	-3.85534	-2.05109
LOC727942	1.98046	6.01579	-4.2838	-0.035541	-4.24018	-3.84471	2.86823	-2.50007	-2.33071	-6.97968	-0.00472411	-0.0364242	-2.06928	2.54522	0.927913
LOC727948	9.04252	6.68978	2.76644	-2.11571	2.95642	12.8113	19.9087	12.9196	26.2852	8.93957	3.48254	6.03941	11.8432	13.0182	13.5829
MT1P2	-0.491281	-0.00858255	-4.60695	3.09315	-2.00164	-5.34373	12.168	-5.08708	-8.77641	-6.28925	-6.11845	-8.00753	-7.26128	-4.65378	-7.24453
DKFZp686I15217	20.1347	14.9048	19.0737	6.07088	31.2499	15.0821	5.00837	27.4965	38.2367	35.0431	24.2779	24.4589	21.7171	32.2028	18.2781
GLTSCR2	4639.88	6089.33	5692.32	4514.17	4828.4	7579.6	6615.61	4842.36	5170.37	4194.4	6266.6	3306.2	4923.85	6297.78	4889.22
GLTSCR1	60.4119	83.9918	48.3449	64.8088	74.29	102.369	63.23	8.48382	71.2545	71.8309	66.4851	77.1105	55.7591	42.8384	43.5285
RGPD5	-4.6686	-2.29905	-6.60931	-0.691059	-0.164189	2.4154	-3.86156	-0.356877	-0.71241	-0.482539	1.35199	-1.0575	-1.79164	0.288042	2.52365
RGPD7	-0.519912	2.94298	3.34201	-1.18177	-2.74478	-5.45685	1.86933	-10.6238	-6.41691	-6.83922	-6.14334	-6.82558	-2.83681	-8.16735	-2.73568
RGPD2	9.44581	16.8498	8.23916	0.613441	-7.86854	-6.97746	1.87113	4.95322	0.165894	-0.515252	-1.57472	5.28458	2.37263	0.447999	-0.0379799
RGPD1	6.70724	4.43218	7.06719	3.48552	6.59604	1.23113	6.05601	15.4045	23.1357	3.75181	5.40903	28.34	24.785	-2.07594	4.76573
RGPD4	-2.56533	-5.05065	-6.26914	-1.18493	-2.82824	0.0121355	-0.50701	4.71376	-2.07547	-2.12536	-3.72244	-3.85944	-3.43731	-2.10954	-1.53227
BEGAIN	6.69091	8.4732	-0.985132	6.24793	0.826928	8.02002	14.2963	3.26075	6.25019	15.8402	14.0159	9.44979	9.15175	12.17	14.1214
TCEAL8	235.831	264.675	204.529	184.404	143.519	191.457	326.922	291.497	115.397	162.296	280.944	167.921	230.679	309.167	312.356
TCEAL7	4.05615	-2.17903	-1.12164	5.43185	3.42768	4.25677	4.02369	13.1724	2.90775	4.24327	5.11194	-1.02285	6.14563	4.68355	1.69391
TCEAL6	-5.13862	-1.65177	3.48681	0.465994	13.5109	-6.99334	-8.27857	4.66946	0.154299	-2.00344	2.99156	2.53764	-0.466702	0.0716197	-0.0576098
TCEAL5	1.22232	-4.57594	4.95018	-3.44504	-3.91554	1.44434	7.59959	-3.84129	8.94345	-5.41615	-8.25812	-0.451666	-0.344596	-4.65414	2.0394
TCEAL4	370.295	514.989	447.558	319.966	343.445	461.097	402.272	405.673	401.257	400.196	531.926	322.785	480.651	448.662	451.083
TCEAL3	590.753	388.851	514.814	589.473	535.44	240.883	524.118	507.097	555.153	921.251	366.392	649.283	650.488	663.227	362.212
TCEAL2	2.71788	108.442	144.711	19.7178	-0.467016	44.8689	134.239	72.188	33.1115	16.9605	49.9111	11.0767	99.788	45.3582	110.512
TCEAL1	69.7172	39.0342	59.885	87.1041	44.6629	14.2534	8.61992	67.6418	20.9378	32.5467	46.531	31.1024	38.7306	64.0978	30.8193
LOC727922	-2.12567	-2.3331	-6.82033	29.6811	5.94094	-6.10839	2.86809	30.0644	14.8425	14.6667	22.0031	13.8945	7.10233	24.6911	11.3731
SVIL	360.361	191.26	347.129	473.434	351.192	153.048	232.171	259.784	239.517	240.253	215.176	289.305	173.091	242.364	138.319
LOC727927	-1.19399	-0.0304695	3.88754	10.5576	1.05911	-6.03509	8.58785	4.59446	-4.62672	-2.04371	-0.641352	-1.06553	-3.04065	4.76378	-2.93693
SPCS3	36.1824	37.3631	13.4795	2.26637	4.57568	22.227	13.1692	60.6242	22.7067	15.1526	36.0764	39.0636	26.3062	21.7634	63.138
SPCS2	351.996	389.048	422.031	230.831	291.308	257.129	147.279	353.795	183.475	251.311	546.037	332.345	473.491	316.716	445.733
SPCS1	4026.5	2448.78	3937.04	2721.23	3293.09	2168.22	1211.63	3774.7	1604.96	2748.44	2769.43	2810.63	2647.4	3505.18	3109.51
QPCT	63.603	53.707	47.043	4.34535	26.2248	20.7606	19.2046	55.5574	30.5103	26.5051	34.4324	25.4365	41.4686	41.4288	25.5815
LOC727934	13.1861	-2.32865	15.8637	5.91867	1.94597	11.2029	5.91847	14.6708	8.96574	12.8029	7.6005	16.029	10.9943	6.36669	9.92202
LOC727935	5.45521	7.69369	7.92779	4.21751	6.70628	14.1865	3.96765	7.61259	8.06058	1.97237	3.37647	2.48751	6.67579	7.13589	11.0595
NUPL2	180.466	164.257	168.882	60.4277	112.737	131.726	87.2444	200.331	80.5912	150.244	206.318	181.694	178.65	206.21	218.682
NUPL1	4.29422	4.63984	1.25735	2.09077	9.86934	4.92648	10.088	4.25176	2.54158	3.50531	9.54286	1.01198	5.68903	2.3138	14.5212
SIPA1	35.3759	54.031	51.457	77.8432	47.9157	139.688	221.598	52.3867	86.4038	42.8474	102.456	93.7249	96.4448	89.4364	171.743
LOC389118	22.7213	22.1155	22.9818	127.563	86.9914	19.4413	105.569	5.2714	146.226	16.1979	2.87827	11.854	25.3724	8.8381	2.95473
C3orf65	4.3339	-3.19529	1.33677	1.65624	0.0297785	-3.8215	-3.53561	1.94356	2.47896	-1.32398	-1.70644	-4.3712	-1.95815	0.199992	1.66731
C3orf63	14.1095	16.2134	23.5708	23.1948	15.0246	40.8135	32.9359	47.1091	18.6009	22.3149	23.9102	13.3894	14.3098	-0.446489	14.2988
C3orf64	101.194	108.095	112.074	98.931	69.1922	66.7829	73.311	112.943	62.8515	117.62	142.004	104.07	101.63	54.7373	50.0577
C3orf67	23.8309	8.96923	18.0978	2.29101	5.66331	7.84481	2.76609	3.80818	12.1583	11.8483	4.57503	7.47572	14.1032	15.7607	8.4457
C3orf68	101.114	54.876	72.227	63.3626	104.036	27.6324	53.8183	136.447	44.0286	73.9063	105.22	85.3172	85.5971	157.483	114.015
OR5H15	1.56521	1.77359	1.44336	-0.941658	6.14162	-6.79635	4.92583	-0.0577904	0.214812	2.87367	-3.45477	-0.544468	-0.361176	-1.21546	-4.22487
OR5H14	-4.23067	1.77873	4.18771	0.571771	-8.17744	-4.67897	0.621092	-10.8201	-6.80291	-0.745883	-2.80839	-3.33516	-2.05235	0.358506	-0.747348
C3orf62	20.7258	31.4567	24.8665	1.78208	4.58509	30.8322	16.8491	8.58087	12.1675	7.48712	25.1526	14.6752	11.2005	15.0507	12.5606
FPGT	10.0076	4.96615	9.3504	2.01275	1.97522	-2.06289	1.7463	6.46957	-0.539895	0.552454	4.23987	-0.444081	4.59491	5.12615	-1.38631
C3orf60	549.991	313.831	338.469	392.104	492.718	296.639	452.89	552.518	344.283	475.485	392.542	539.107	457	580.356	354.108
FPGS	7.71147	-0.13048	0.866827	13.0651	3.11089	-1.88043	12.5436	-1.30991	1.7808	8.58741	2.22138	-0.176166	3.21228	-2.52153	2.3547
LOC389124	9.14372	10.6705	9.91979	1.24824	4.49165	7.49974	15.0438	2.91948	2.36857	1.04134	1.32328	4.20899	1.13344	10.3167	7.37592
LOC389120	2.28326	-0.0385859	-8.57924	9.66594	5.48994	-3.94871	3.81363	3.48891	4.61189	-2.72424	7.46028	7.70659	3.45154	10.0094	4.19425
LOC727909	-1.19321	3.89536	3.56678	1.44452	1.06223	3.25667	9.13898	-0.940139	-2.81856	2.27671	-5.36095	-4.30481	-2.72353	2.68575	2.94298
LOC91431	3.5137	7.70678	-0.465672	4.25096	11.1932	-0.834839	9.12995	-2.22456	-4.02961	2.37528	4.02448	9.27762	0.632494	-3.45032	-3.40941
LOC390110	-5.29632	-0.0344643	5.74555	19.6933	-0.846859	9.15873	-0.67162	-5.40681	-0.347331	3.17349	2.26462	11.4503	1.73329	8.58215	4.21027
SPECC1L	485.267	825.964	621.282	646.58	556.588	922.945	843.403	460.194	1017.59	658.936	800.773	757.857	750.364	480.286	487.209
TIMELESS	52.9902	69.9871	53.3278	13.5019	74.8167	105.005	106.023	35.1738	56.6316	86.6219	174.782	80.6766	80.8283	67.8555	136.95
NUPR1	269.853	333.854	397.496	574.993	513.442	164.891	287.284	199.191	223.374	326.278	127.767	243.921	290.505	468.698	207.585
CLEC16A	226.046	230.028	174.426	218.985	241.958	333.799	218.206	206.635	527.686	318.338	234.361	400.049	347.683	140.863	133.959
CAMSAP1	401.797	244.499	266.447	333.014	255.314	226.762	444.637	266.657	352.339	449.873	323.598	428.606	328.479	255.021	211.457
NPC1L1	7.5718	7.02933	7.48901	11.3923	-3.44903	-0.487206	6.91055	2.76097	5.3223	7.83099	1.77253	6.01869	3.0737	2.2915	-0.521329
LOC389102	4.675	-2.73084	-0.014963	2.78819	10.4429	2.75608	5.86111	9.18198	2.90957	16.5555	11.8901	10.4358	5.86197	12.8071	21.8383
AMELX	-0.443183	-0.921492	-3.66363	1.75688	9.83361	-0.918145	-3.03659	1.25049	1.46239	-0.659114	6.55821	2.73577	1.45239	7.72394	5.9348
AMELY	-2.80451	0.234644	-0.245792	7.82857	15.5967	-8.71327	0.23595	2.98379	7.60747	-1.58089	0.258537	0.352666	6.01884	3.45817	3.25471
PNPT1	1275.31	1191.12	1359.84	2163.42	1739.25	1767.37	3424.15	952.29	3830.21	1223.82	687.947	1004.37	2210.43	994.34	1775.96
LOC389105	6.35164	-0.0384132	-0.0135381	0.245868	1.96652	0.620897	8.6622	-1.21272	-0.51099	2.53645	-0.056782	-1.78026	1.1487	-2.04384	1.40909
DAK	71.6965	55.5806	82.4778	104.583	57.8279	79.4958	75.6378	90.8046	77.905	97.2114	49.9463	80.5825	54.5235	87.7617	87.2895
DAP	216.475	155.074	139.533	197.257	170.113	205.732	169.317	158.53	74.9002	174.77	109.035	166.022	133.543	173.825	180.863
DAO	6.05133	-1.66704	0.160091	14.0146	6.14227	8.84991	4.65873	1.33644	11.8854	4.67621	2.94778	5.88403	5.14268	3.72893	-1.77189
SKIV2L	291.854	241.591	264.112	500.572	382.536	343.927	540.356	259.664	471.068	404.81	244.486	381.266	283.459	305.611	307.076
LOC389111	4.26806	4.2507	2.99764	4.27567	13.2942	9.55303	8.02747	8.33047	8.04588	7.58939	2.90125	5.51112	8.58309	9.15288	3.35244
C3orf27	-4.24364	10.5427	-5.6376	2.2886	-1.91787	0.824724	-3.94515	1.42939	-1.85185	1.24252	1.03942	3.07643	2.29283	2.07625	-5.93135
C3orf28	124.824	183.485	115.845	92.5008	130.795	200.445	148.096	533.657	173.159	203.932	540.356	214.513	245.662	447.231	531.968
C3orf21	167.67	160.666	132.065	130.884	97.4945	185.946	237.098	120.898	169.731	107.879	142.072	150.072	137.996	132.311	129.423
C3orf22	-0.461436	9.45675	4.97854	21.7461	3.08201	2.25605	0.451313	4.4679	5.29136	15.1533	-3.46867	9.83832	13.9695	-2.70386	1.3745
CLEC14A	-0.352531	18.0276	75.2728	7.73103	4.96495	75.0993	53.4844	-3.08318	-5.3085	-15.5615	12.2831	4.77651	3.34296	-0.512859	0.574657
DBI	1735.85	1087.61	1728.2	1056.3	1375.33	794.168	573.957	1757.53	618.648	1040.53	1207.04	1196.14	1162.03	1648.17	1306.97
C3orf20	10.7432	2.91851	2.02995	4.6511	-10.9357	-4.56288	2.2383	-0.461655	-5.29664	-5.40005	-4.30206	-4.18576	-7.22625	0.0698692	-5.47099
DBH	5.32629	8.85279	4.25038	10.0574	14.2752	6.24272	9.56716	-2.0067	-0.919225	6.78585	-11.3555	-3.47266	-3.84655	-5.62568	-5.08167
C3orf25	105.787	27.807	65.1803	110.133	23.035	14.1193	60.4179	15.0349	65.7668	55.7947	28.7759	68.9898	41.631	76.8087	0.200716
C3orf26	81.6541	87.16	121.723	55.3495	66.8679	73.7475	71.5841	84.3636	44.9764	89.3068	138.845	116.699	129.871	141.061	185.662
C3orf23	11.3738	11.0648	14.4022	4.46631	3.88567	0.729748	2.22309	0.237384	3.61392	1.29257	9.17105	11.6576	10.9431	3.78088	0.822589
C3orf24	2.45383	-4.2718	-0.983012	6.0575	-0.233232	-0.0111575	-3.21431	-3.57297	0.534437	2.9277	1.81024	-3.88328	-2.07744	-0.840702	0.786143
DC2	275.618	227.6	267.783	79.3273	128.295	132.695	114.7	363.228	84.125	214.273	496.155	261.374	401.805	266.097	283.661
DBP	35.0069	35.56	34.8266	6.91212	3.93213	124.06	21.7645	23.0164	22.0967	9.91053	52.6009	16.4341	25.1481	63.2264	31.4598
DBT	127.14	164.72	103.898	110.377	103.822	162.912	242.012	162.152	168.748	151.734	147.644	151.071	135.398	165.953	158.53
HSPC268	222.584	211.075	209.255	554.04	610.118	302.73	512.182	163.884	867.081	124.377	67.5772	39.3607	286.766	102.045	334.602
C3orf38	117.234	61.507	88.1634	39.8271	51.6002	37.113	14.55	109.745	26.6508	59.9309	107.581	85.15	70.7675	58.5846	68.2269
SVOP	3.81245	2.0226	16.1163	36.3765	0.327667	-0.364757	4.21825	-1.6531	5.40094	3.25458	2.77798	-1.91631	2.95426	1.43425	7.21783
C3orf39	129.365	87.0068	106.113	157.846	155.763	73.7964	96.6203	137.148	144.621	135.02	71.1292	151.223	100.401	107.485	82.6897
DCD	-1.15473	-1.42604	-5.04593	17.8519	-5.71307	2.06109	9.64937	7.598	6.65834	3.17035	5.19095	-10.5915	1.65376	-1.77862	5.75128
DCC	-1.13818	-0.444456	-0.244012	7.83864	6.14292	7.58783	-4.60929	-2.79184	0.23606	2.06421	1.47622	1.95668	-2.77669	3.44791	2.744
C3orf32	288.376	46.5593	50.7452	342.392	247.102	13.4926	5.92678	4.95194	38.7859	18.1004	24.6714	33.3231	45.3858	23.8309	17.3258
C3orf33	5.16143	6.56985	0.99999	32.7143	-0.616414	23.9139	48.5656	0.200716	10.327	7.69808	-3.41153	7.84753	6.57813	2.94463	5.14315
C3orf30	6.48153	1.55344	3.23288	1.75247	4.98636	7.68245	-0.702359	5.22951	2.42596	4.04242	9.45573	7.73846	6.75222	7.23366	5.37412
DCI	161.301	114.708	113.551	49.9463	52.8391	214.508	155.763	82.6485	41.9641	70.6154	117.628	58.3959	60.5244	137.148	139.174
C3orf31	153.729	164.509	146.671	120.666	104.826	131.083	91.9432	152.192	147.51	202.714	197.993	133.527	105.667	159.011	109.506
C3orf36	-8.61727	8.05701	0.929455	4.65236	6.91926	3.53291	8.73838	-0.984761	-0.830059	2.26914	0.0666626	-4.21032	3.0862	3.57474	2.77362
DCK	43.5227	38.1787	46.5774	28.2452	6.14456	18.7413	9.71471	62.9937	19.2997	33.4367	58.6025	48.2824	51.8841	39.5082	64.385
C3orf37	86.0652	116.144	110.789	95.5167	54.6018	211.841	161.618	86.3549	87.4267	84.1626	83.1065	96.7102	57.981	103.456	151.78
C3orf34	926.689	761.393	817.951	1551.21	1584.36	1126.29	1484.72	765.724	2727.83	679.579	340.603	468.886	1133.41	483.6	832.668
DCN	1.88098	558.593	474.136	143.51	190.84	161.063	159.582	157.785	6.45159	3.84553	62.6731	65.1405	169.278	71.9683	164.356
C3orf35	4.91629	1.44185	1.5218	10.9545	2.4726	5.18134	6.88541	-2.2614	-0.069441	-2.68587	-3.95305	-2.30255	0.00605525	-0.433949	1.34915
ZAP70	3.08291	4.15866	8.42677	2.02244	7.66262	13.73	22.8975	7.5488	10.9845	-1.247	0.0909396	13.5718	5.24848	7.83573	17.5479
DCT	-1.14928	4.68648	-5.04427	2.99534	-2.73147	3.51913	14.1099	12.5411	6.05471	-3.10206	1.06269	4.60241	2.07423	5.1796	4.57379
DCX	-0.734405	-2.367	4.65656	17.1973	8.16075	15.4725	4.21367	8.48621	11.8043	-1.55484	9.81483	4.88145	7.58494	12.7155	11.7785
DNASE2	525.161	550.051	554.04	485.571	476.813	524.841	641.308	523.715	944.422	727.369	593.288	845.221	670.325	592.209	576.242
LOC149643	12.156	11.2135	8.04493	1.32328	6.80973	2.37354	1.43927	23.1939	4.26044	5.19465	9.92689	11.8694	3.45935	-2.11432	-3.66115
DNASE1	1.40329	0.210021	1.46646	4.56729	3.90786	10.3259	18.8893	-1.66847	1.32961	2.01112	3.56631	10.0635	3.5007	-1.3758	2.96321
LOC389174	2.28188	3.81001	7.37516	4.27901	2.92957	-2.08898	4.39042	-4.71399	2.61353	2.95991	5.51749	1.74561	8.9453	5.75652	10.228
DDC	61.0547	60.5153	12.9133	4.23267	-0.667894	15.0543	8.94651	32.3365	33.2251	16.5418	7.10076	8.93764	15.2269	47.2702	14.0055
LOC91461	-5.94668	5.157	-1.26034	-0.467016	6.25669	2.69532	-3.89101	10.321	6.80952	-0.35524	1.55595	4.85153	6.01643	10.2298	1.32214
CLEC12A	0.637916	3.44213	5.46976	19.1378	2.65894	-3.12672	11.0641	6.05975	0.779605	1.53454	2.58523	3.82365	1.37767	7.12024	1.9838
LOC389137	72.3638	77.9961	55.8576	79.2756	59.6058	116.213	163.583	100.676	102.156	90.5508	96.7155	78.8753	77.7939	112.983	126.751
CLEC12B	9.15873	9.90745	-2.06675	4.28417	-2.77785	0.245057	8.04414	-6.97191	-6.69098	6.23592	-5.07247	-3.95157	-4.87449	-4.48529	-3.83532
C3orf44	20.351	12.9916	8.66795	-1.14379	23.7302	2.95222	2.77384	2.73906	6.55175	19.335	-0.931381	9.19058	7.60968	12.4595	-2.15101
C3orf41	0.742314	2.3663	-0.450985	-7.89302	0.366321	0.821961	4.76721	2.0049	1.85203	-5.02613	4.10614	2.03604	-2.02219	-8.56791	1.46478
C3orf42	2.55053	2.52589	4.89687	20.461	3.01597	0.153537	-2.5188	1.67629	7.46358	6.03342	3.88527	6.30482	6.3915	3.37839	5.33303
C3orf47	-11.5729	4.03292	1.46965	6.55419	3.08668	15.3921	4.77666	-0.615853	3.08125	0.45008	-5.38406	-2.09109	-1.85631	1.73882	-0.961076
C3orf48	-3.85482	-1.68056	-0.446825	6.55731	-1.38729	-5.82453	-2.74418	7.17102	2.24608	-2.12672	1.64228	-0.458133	2.92555	-5.47328	-4.17877
C3orf45	7.46696	-1.86345	-7.2126	6.55739	1.44227	2.25953	6.65787	-0.363424	-4.3194	-2.80725	2.95823	-0.445709	-5.71115	-3.11273	-7.36108
DDO	11.2427	0.529522	6.17174	8.33704	15.481	3.80677	2.94739	11.121	7.3704	9.20093	6.25951	12.093	9.34216	5.21342	6.04821
C3orf46	1.45392	5.2863	11.2913	6.55545	-3.8689	8.21035	11.2098	-1.19787	-2.02391	3.73965	0.552454	1.33747	7.72885	6.90254	1.95354
DDN	4.94454	-2.41057	-0.253545	10.4196	-6.85595	1.442	-4.6525	1.75809	-0.0315506	-0.968714	6.89964	-0.457965	-2.70092	4.24516	2.04768
LOC392781	7.72841	-3.94656	-10.8375	5.90259	5.29477	-5.31271	-6.39295	-7.24593	-3.25402	2.28769	4.23801	-1.27314	-3.51375	-2.60616	-0.827587
DDT	811.543	997.005	729.104	764.468	942.928	1226.1	811.219	1193.09	506.106	580.354	1110.3	553.692	894.304	1106.62	1804.71
SNORA10	11.852	24.6777	14.3098	-1.91979	12.9908	28.8683	30.9352	4.11549	12.7983	18.5822	20.7411	18.8651	20.3593	4.92518	22.0841
LOC389142	4.27028	-5.03332	-2.24965	26.5545	14.4178	1.75369	4.39178	16.7682	16.0307	3.91202	13.489	13.6618	9.65465	11.2967	20.3636
C3orf54	56.344	215.28	77.293	46.0746	4.58769	174.449	255.695	142.725	136.748	80.0419	239.292	47.4231	168.273	121.055	281.14
C3orf55	0.742826	-6.78953	-7.53229	2.2923	-1.39064	-1.06128	-4.20372	12.8266	-1.39792	8.12855	9.63863	-0.518563	1.06339	2.86765	6.03841
C3orf52	71.8207	52.2428	71.1218	32.4246	5.66309	79.6551	12.5827	65.9832	43.6716	73.1893	56.5986	79.0663	56.6793	65.6072	37.3045
DEK	308.06	438.759	438.333	224.998	241.605	299.14	279.934	914.249	362.256	420.32	1106.62	673.083	639.697	613.38	957.35
C3orf58	177.541	149.541	144.342	23.5621	135.276	144.455	97.9114	128.774	71.8309	69.9706	104.992	75.6378	83.6702	44.764	78.2793
C3orf59	26.7609	48.8322	35.6579	13.3774	4.58537	30.6205	52.6414	5.50539	13.2877	42.7989	33.7717	31.4859	24.5853	39.3724	40.609
C3orf56	2.96647	0.240269	0.914679	4.64752	3.0905	15.0093	9.13944	0.231959	-0.467169	3.54976	-2.85022	-5.4078	-0.343148	7.48477	-0.362999
C3orf57	-1.14362	10.5246	4.88515	0.638435	0.360793	2.8416	-6.13431	4.15531	-2.96949	2.78997	12.8994	-1.22036	1.84306	1.6894	2.3183
DES	5.84787	3.92322	25.0792	5.51558	38.9648	-0.538469	1.00523	-2.94142	2.86745	-1.41734	7.01207	5.50493	5.91867	5.18143	3.51188
Klkbl4	0.163487	-0.445511	-0.917658	11.8936	-8.39741	-7.89302	2.76329	-2.72106	-1.91787	-2.75993	-3.57231	-0.93126	-0.0531822	-1.39316	-1.24618
LOC389151	-4.29769	-11.766	-2.25133	14.9273	-1.65281	1.75398	-3.42679	0.618498	0.559901	-5.38462	2.92263	-3.67144	-2.83287	0.472508	1.99007
MDC1	114.876	132.453	169.197	153.358	63.4595	120.418	132.453	84.9744	231.321	128.929	107.852	112.412	115.995	65.3966	40.0534
LOC341457	5460.23	6458.45	6534.55	2783.54	3824.98	5460.23	862.964	4962.14	2309.35	3270.17	8669.71	4736.26	5820.98	3677.34	5460.23
FLJ10404	3.65247	8.62976	9.13473	23.9233	7.78194	22.9388	16.2773	4.02919	10.9669	5.32849	2.71825	5.44529	-0.74504	1.41358	10.104
IL4I1	0.345804	0.838624	0.402148	-1.3002	-2.70468	3.58178	6.78851	2.70855	0.807434	-3.28262	2.44964	2.85013	3.3826	-1.9608	0.644867
SNORA32	9.12737	12.2793	10.0374	0.155555	22.9959	4.48916	0.203818	6.56607	8.36481	15.8449	4.76365	11.4395	13.3958	2.36868	12.549
SNORA33	13.1696	19.599	19.7321	13.2021	51.0311	40.0795	54.5103	37.5095	60.0874	67.7822	44.0576	28.3138	37.1245	52.8247	60.8007
LOC389405	-2.8406	-5.38705	-2.24203	0.327792	2.00156	4.38632	-9.08209	-3.87733	0.900992	3.35712	-6.50397	-2.0179	6.67495	-6.25778	-3.49628
DKFZp434J1015	4.97941	1.76577	5.13645	16.9751	-4.86941	4.92375	2.7196	15.4988	2.1518	12.1474	8.36764	-1.17752	4.48714	12.1804	3.93777
AR	3.18446	0.148856	6.64264	8.82126	4.09453	-2.75607	7.20328	-2.59589	-0.543071	-1.42756	6.50366	-1.31831	-3.61803	-4.96901	-1.11483
SNORA25	28.7609	55.7633	43.9185	7.57995	31.1293	48.4592	79.6927	3.49897	46.2955	46.93	7.01601	38.1897	43.4357	13.489	43.3139
CGGBP1	208.805	293.799	268.031	188.515	195.858	236.362	169.394	269.342	231.261	236.278	392.234	290.96	310.073	246.601	288.596
LOC644808	4.96446	-0.841313	3.49387	-0.930197	4.36437	-6.22693	2.00996	-3.48546	-0.531914	0.164415	-4.60221	0.338087	-1.8792	1.99093	-8.52741
LOC644809	8.24418	-2.00252	2.92121	0.651244	0.621353	0.592457	2.7032	7.60329	5.85719	5.29092	-1.87559	5.86395	5.84651	4.76767	7.2168
SNORA62	6.38475	5.40273	15.8847	11.2125	5.51726	16.2013	-3.91878	-2.1469	-2.94009	7.20713	2.76211	8.34036	4.96983	-2.07043	0.743869
LOC644806	-7.09831	-7.22014	3.4912	5.67265	2.01519	4.19736	15.8517	6.91797	6.76235	8.01137	8.05583	8.85544	7.19881	11.4492	12.8093
DHH	-7.88422	2.22725	2.95762	-9.15904	0.329676	-3.10645	15.8753	-4.19816	-6.71021	-0.0451698	-5.10828	-0.516985	-5.30755	-6.5114	-2.84262
ACTL7A	-1.24579	-8.53544	1.76289	0.568403	-0.249096	1.40233	-7.6703	2.9876	4.47497	4.94687	0.61302	0.924689	5.18947	2.98737	3.73053
ACTL7B	12.5328	17.7567	4.67693	26.9488	5.8632	2.92673	-0.825417	3.5312	-2.24965	4.03188	11.8612	6.78233	-3.84819	6.34587	3.48769
FPR1	15.5102	5.85266	1.55892	16.1912	17.2305	3.9396	10.5827	5.49809	-2.04359	-2.51053	1.98312	4.96888	-4.20491	-4.64106	-0.0646782
LOC644800	5.19731	2.15306	0.184674	11.4432	7.02391	2.77384	11.3922	5.13286	4.28806	-1.06827	0.244798	7.93043	6.14424	9.12455	-0.456258
FPR3	22.2428	10.5638	18.3868	-3.89028	-0.543418	21.7288	28.0241	2.46069	13.5846	-3.9321	15.8457	31.0133	27.3091	20.4323	101.155
FPR2	0.581592	1.4429	4.78447	2.94103	-0.799998	1.79744	-1.39615	-0.896438	0.320132	2.46124	0.243057	1.36582	-1.89871	-0.912598	-1.53643
LOC644802	-5.38217	-5.09678	-0.533756	-6.83188	-5.37684	-6.98036	-1.36235	4.5935	-1.21249	-8.8563	-4.66723	-1.87225	-7.89246	-2.04904	1.13619
C2	13.388	9.14454	21.3714	35.2142	4.57472	66.6625	26.9367	16.5387	28.4065	20.02	7.00202	39.4743	20.7269	17.6342	36.8113
DYNC2LI1	294.91	104.392	192.191	172.174	179.832	25.5916	101.046	233.778	150.657	145.727	93.0197	268.307	249.466	163.92	47.4933
C3	27.2556	4.61229	24.3652	17.7301	49.0717	11.1618	5.54227	-2.34736	4.30256	11.0246	-0.347045	63.2864	6.5349	-0.0914039	3.92384
C5	64.0042	108.371	117.322	13.1635	133.976	102.132	152.301	80.8353	224.528	131.993	114.146	87.2012	116.28	80.7025	65.278
C6	7.20192	7.46526	56.2679	144.069	76.2997	4.84706	66.3756	47.412	8.84854	15.135	12.5333	15.7469	25.1628	74.9948	1.65427
C7	-3.95892	0.474731	15.2344	-8.52851	-9.26173	3.64717	4.93123	-7.64657	-4.18646	-6.23666	-9.45446	-7.54798	-2.22441	-10.5848	-6.15172
C9	-2.80703	-6.69794	1.36545	-7.71435	-7.69999	-6.15458	-2.53322	0.582689	0.723013	4.36554	-1.41131	-5.41088	-2.95208	0.233376	-0.642121
LOC400304	19.2087	51.0344	67.0659	75.2728	86.5154	46.5446	61.0607	105.949	404.634	221.774	74.79	108.997	144.069	112.7	141.556
LOC400301	-2.81499	-2.7148	-7.88331	-0.639973	1.02625	-6.21015	-2.3237	1.33313	0.729013	0.33163	2.92957	-0.499583	-1.86682	-3.04731	-1.37373
CP	35.3911	16.2511	27.6154	0.072506	14.0235	22.2111	3.53717	33.3498	11.103	18.0251	15.6778	25.6553	22.4634	9.54715	6.48017
CS	287.685	464.147	348.174	354.836	316.139	453.502	405.667	327.136	430.015	444.289	588.637	367.833	363.274	333.361	511.81
LRSAM1	28.8578	29.1822	30.439	27.8247	18.5026	45.9993	52.7956	22.4238	56.22	37.0596	27.8221	29.7588	37.1218	27.702	38.6201
LOC644828	3.3539	9.27456	1.04151	15.4943	6.92603	-2.84715	-3.47012	-0.360167	5.83663	-2.08238	3.56935	4.57986	4.77213	14.0152	1.36046
LOC644829	1.24662	5.93887	2.05415	1.149	-6.5239	11.3897	15.5027	-4.58584	-4.6745	-2.25256	1.14741	0.644139	-4.65274	-2.23292	0.826319
LOC389435	8792.04	11250.8	10428.7	6957.1	9199.79	10939.1	6861.66	10591.4	5028.65	6894.09	10659.2	6653.38	8342.72	9041.11	9863.77
RPLP1	4653.5	6951.61	5916.7	3666.41	4963.06	6582.59	6131.38	9408.92	4951.17	5105.37	6792.18	4854.28	5909.52	7799.54	7516.11
RPLP0	1628.69	2513.79	1932.62	814.606	1272.67	1500.61	470.362	2300.42	734.026	1238.02	3032.19	1447.21	2111	2086.56	1829.3
QPRT	30.4594	1.24694	3.72409	-2.81986	5.7623	4.22523	14.0333	18.4804	4.65509	-1.15708	2.01835	15.8674	25.6472	5.16441	4.27304
ECSIT	33.7644	33.7691	50.3406	9.66145	40.9435	57.4168	54.504	48.3346	28.306	24.5795	25.568	18.4873	27.9076	55.7731	60.8052
LOC644826	4.64968	2.2271	1.73568	0.642092	2.01574	-2.04204	-1.35728	3.53153	-3.50463	6.57211	-0.480338	9.44775	-0.489282	1.45965	0.162956
LOC644827	-1.38464	-0.353114	1.04367	-5.356	-4.27575	-0.360917	3.92767	-4.5776	-1.19217	-5.12401	-1.25988	-0.020403	-6.40478	-3.93337	-6.41874
LOC644824	-3.54556	1.03291	0.174683	4.77989	10.8258	4.1017	2.02841	15.4965	4.20799	1.0497	5.2863	2.77646	-0.0683802	2.98612	3.1705
SNORA7B	467.935	175.859	185.939	378.554	406.299	51.4158	201.579	184.998	359.756	204.976	92.5738	214.077	260.271	256.019	75.5497
LOC644830	1.14944	-7.21944	2.92164	5.7574	26.9551	-2.84755	7.45591	-0.47864	-2.86492	2.53274	-6.29456	-3.5573	7.37986	9.1293	1.46805
LOC389442	1.36294	4.241	3.81765	8.76114	2.00058	-0.251606	10.2302	6.64595	17.3533	4.49165	8.01954	7.29389	5.89472	3.49833	12.1695
RPLP2	9784.78	9988.78	11197.7	14748	16900.7	13375.8	15101.5	20004	14367.7	14367.7	16679.6	14367.7	16679.6	17016.5	17601.1
LOC390427	3.57823	7.17558	-0.736077	-1.44267	-5.62314	-0.549101	-1.44952	-6.17368	-0.705665	0.731937	-4.77213	-7.04205	-3.54819	-3.18898	-4.39377
LOC644819	-7.76707	-9.45143	-0.53288	-4.18744	4.36256	-0.359974	-2.11884	-2.32654	-2.84915	-5.05364	-0.359974	-7.20334	-6.37424	-6.27631	-1.2527
SNORA70	35.2142	108.917	107.466	45.1655	126.821	167.88	30.9384	74.3621	117.653	115.078	43.9156	55.5757	84.3305	80.2162	82.6669
ACTL6B	3.73168	0.241143	4.67991	31.8585	4.66108	25.2501	7.19174	15.5087	6.78292	13.8969	3.16226	5.90368	14.3117	14.3238	9.03995
ACTL6A	410.785	409.878	318.459	174.694	255.912	347.362	112.818	386.735	163.89	275.895	559.639	233.356	328.322	280.65	324.235
SIRT4	15.3893	17.6534	14.3013	11.5265	5.15871	5.14385	8.24305	9.14192	9.1207	2.96009	14.1945	10.0076	15.8533	16.223	-0.058359
SIRT5	127.501	115.971	126.568	94.82	93.9493	87.106	94.4389	139.142	144.091	131.688	97.3031	125.226	98.1685	178.698	118.173
SIRT6	10.4645	-1.67665	0.371362	-2.32809	1.23181	17.9291	4.00777	8.95003	1.99988	2.2572	3.54553	5.93335	3.51794	4.95916	-1.37837
SIRT7	50.6419	44.0522	43.9052	36.19	24.6886	64.9789	6.38194	7.47242	26.752	40.4489	41.7362	35.1506	25.3565	15.0626	16.5112
F3	347.431	499.447	573.58	289.982	217.004	216.766	366.749	1411.72	456.598	862.249	1032.53	676.669	913.22	689.212	723.42
LOC644816	9.15271	20.0181	8.85544	5.67204	2.01595	9.9116	-6.97667	11.8599	5.1429	8.21891	6.64923	16.3305	8.37078	4.19817	8.35589
SIRT1	42.8346	101.181	63.8287	91.4751	58.3721	63.2214	75.7199	93.776	89.9502	89.4192	89.5486	78.6616	102.742	64.2554	71.2114
SIRT2	18.8902	18.9054	25.777	2.22725	4.19643	25.2287	15.7042	3.87963	2.0559	8.69789	4.90467	7.67577	1.72423	0.514343	4.4463
LOC644813	-1.38515	3.25834	3.90762	11.4418	2.61407	1.7837	0.350682	5.66281	-0.0515078	1.75045	8.2537	-0.972211	-1.26998	9.03978	2.93981
LOC644814	3.89963	-4.27457	5.15552	-4.18774	-5.38138	5.47051	6.23667	-7.279	-5.3811	-4.62051	-3.66551	-5.35052	-7.00806	-2.14061	-12.8561
SIRT3	2.05363	7.50283	11.0926	-5.45271	-0.751549	0.743201	16.4257	-2.86264	-4.36151	-6.6132	-7.48741	-6.32847	-3.61857	-4.86777	-3.57024
F5	26.2969	-0.650058	13.3779	15.8483	1.99736	9.65465	0.260317	-2.79315	-0.82337	16.5167	4.1174	31.462	13.4812	2.8752	8.04083
F7	1.09907	5.37779	-2.13939	-0.832046	-2.37463	3.19617	0.584514	-3.29105	-3.71758	0.113347	-2.8789	1.08337	-1.47815	-1.6178	-0.704042
F8	0.123478	1.08335	1.66551	1.0977	8.94947	1.64465	0.3672	-1.4035	-0.499067	2.14407	6.97541	4.1617	2.03958	0.285253	1.09726
F9	4.4688	-1.91047	-0.831506	-0.973826	4.28868	-3.0393	6.13084	19.8879	3.07192	11.8449	14.4206	5.52458	5.86855	12.451	13.3844
BDH2	14.0235	4.63267	5.75072	2.07674	-4.18087	10.8302	7.73485	0.335187	4.97016	1.6354	5.89182	2.99742	10.0314	3.92953	5.88972
BDH1	83.5272	25.56	78.1293	132.99	100.91	17.3852	65.8316	52.7165	77.1838	69.1754	14.362	109.129	69.4174	95.2941	30.1311
CDC42EP5	540.027	819.799	501.06	695.699	504.21	1631.67	1513.5	1157.69	639.393	1403.38	872.961	897.311	561.91	1136.06	2008.78
CDC42EP4	1533.32	1739.66	1288.56	1527.25	1539.62	2900.59	1686.9	1811.93	2129.89	2091.13	2157.65	1374.43	2261.76	1411.34	1860.01
CDC42EP3	9.15112	15.0606	11.0999	6.36568	-2.69543	0.328523	1.72985	29.4916	11.4116	6.01453	4.00763	8.00166	11.8428	5.51352	2.93737
CDC42EP2	23.0069	31.1569	24.3097	48.8322	7.60022	19.3116	34.5008	33.6226	69.1841	102.814	60.9004	54.8924	66.6746	26.7829	55.1974
CDC42EP1	6.07015	0.340872	4.19652	-3.66311	2.22626	9.51648	5.89389	1.07635	5.206	5.74174	4.65231	6.17005	0.798765	9.73322	2.42834
FLJ22447	0.194627	0.688048	1.58272	7.77441	7.12017	1.18752	-4.50641	10.5697	4.21965	4.31433	2.55187	1.46836	4.99883	2.2377	3.44719
SNORA65	4.97821	9.91399	4.94116	13.273	2.7337	15.598	1.15343	8.9453	3.46372	9.83115	13.9712	8.84595	13.982	12.3654	12.1612
DLD	180.808	181.082	137.898	169.765	111.595	124.377	59.8497	184.382	50.9545	112.076	152.792	129.406	142.524	180.828	163.98
SNORA66	-2.72209	0.819483	3.81634	1.3697	0.204217	-3.66334	-1.20246	2.8699	-5.54289	-9.28103	-8.58864	-9.28707	-3.51192	-3.9397	-3.03608
MDFI	4.20438	10.4465	7.59875	3.07012	-4.63517	-5.08953	6.66382	-8.1705	-7.68113	-5.74727	-8.51076	1.38882	-8.61628	-6.97786	-0.969336
SNORA64	13.1699	17.1517	10.9936	-1.91349	2.7331	20.4627	0.203015	4.20118	-1.37756	19.3327	9.35899	11.3906	14.2784	1.34373	3.45856
FH	488.187	705.188	563.733	351.368	464.127	699.149	1012.95	658.554	451.108	586.142	970.236	506.604	602.979	772.146	659.505
LOC644844	18.2063	18.0146	13.2922	49.0074	37.2761	13.0032	26.7718	76.2104	20.546	35.1913	31.0115	19.7132	22.2215	32.9533	31.4825
LOC644845	3.88954	2.22912	8.85637	-2.7856	-6.52345	15.8748	6.14951	-6.80489	2.04	-3.88645	-0.925665	-6.41718	3.54237	-1.38515	-1.76321
LOC644843	-9.76804	-4.27394	10.8302	-0.932013	0.605366	-5.02287	-2.12024	1.04704	-5.63819	-0.258233	6.23903	-8.39534	-1.42253	8.75555	0.158722
CCNDBP1	601.908	434.824	528.611	412.125	443.73	222.805	145.883	541.275	372.375	411.238	475.649	636.037	566.203	680.267	362.862
LOC644846	6.38119	-5.07027	0.178646	4.93136	2.01847	6.36371	-1.35873	9.53428	9.13988	10.1442	5.19348	7.20287	-2.51927	18.2147	5.13582
HLA-DMA	1431.89	681.144	1431.89	2929.01	2713.28	1179.79	3322.51	1495.69	2279.19	1300.22	783.459	3270.17	1679.4	1332.62	2900.59
HLA-DMB	1036.45	336.335	1560.45	2690.34	2134.1	1113.14	4766.37	1645.99	2463.47	1241.77	798.144	4008	2243.64	1282.54	2964.72
LOC644852	11.0207	6.81311	10.7214	5.83473	-0.295486	12.4515	37.3397	4.01401	52.3204	4.17671	9.50413	0.463722	20.0782	3.96159	16.4262
DMD	3.58387	4.58386	4.85302	2.09851	9.5763	7.99591	14.2958	2.35431	19.4141	7.80496	5.76013	1.89237	4.51698	1.32045	7.81656
CSMD3	0.277908	-2.10548	-3.39232	-4.41633	-4.43017	-3.40409	-4.03388	2.26619	-1.33659	0.535376	-2.66624	-4.69616	-0.397637	-2.18902	0.611717
GC	2.06532	11.2879	3.44702	5.94205	375.764	-0.0643811	5.51003	-5.07027	-2.06928	-6.17896	-4.321	-5.81807	-5.45733	-4.22188	-2.52738
CSMD2	-0.440695	20.1081	-3.03131	-0.846683	-1.37837	-6.85043	11.8452	-0.485372	-1.17605	-2.41471	-5.06398	-13.9042	-9.08299	-3.54851	-6.16334
CSMD1	51.4821	16.8329	30.9387	42.7071	48.8072	2.22129	23.4676	13.9832	22.5689	49.697	3.86338	70.4428	38.3173	28.94	2.06896
GK	243.827	75.4283	172.358	142.779	128.041	56.438	57.6706	243.968	107.018	156.545	131.669	205.053	156.588	139.678	130.324
MDH1	2942.86	2617.48	2699.42	1298.22	1918.88	1993.66	702.437	3000.1	1359.94	2105.3	3171.11	2519.61	2929.01	2472.47	2341.38
DMN	5.63854	17.4567	10.8718	2.99769	8.80861	8.2073	26.6351	-0.842475	10.5088	11.4112	2.26258	-0.558672	11.6466	4.05096	-0.0048635
MDH2	5126.28	5394.13	5208.03	5138.11	4573.77	5328.05	8475.87	5645.2	5968.51	6861.66	6754.99	5899.31	6468.95	5170.37	6492.53
LOC389422	-0.0225075	1.01131	3.47404	1.25049	2.00148	-1.20609	-2.60604	-2.14425	-0.926122	0.722433	8.7614	3.50667	-1.26007	8.44395	0.361368
LOC644838	-1.79095	-3.07255	-0.504055	7.5111	5.87313	1.71615	-0.57851	19.5004	4.79239	2.91772	3.52624	5.01126	5.18754	5.94428	7.44693
LOC644836	1.24912	0.920752	-4.4082	5.75708	15.8512	6.38664	-5.37309	24.6714	1.23418	7.74898	7.59281	8.35203	6.81262	11.3797	4.22991
TTLL7	38.092	4.47814	24.4943	-0.539895	11.8936	-4.56194	-2.03382	17.3198	18.0227	30.0362	22.1155	30.0819	23.9963	30.2585	11.8858
TTLL6	27.7976	14.2972	29.5762	43.6967	11.8873	11.609	47.8779	8.76425	35.3979	34.1345	14.9213	47.0973	29.9649	48.7356	13.302
TTLL5	185.134	96.3458	103.579	238.213	125.87	60.3999	277.856	160.666	318.492	275.515	147.496	213.99	179.69	163.374	106.684
TTLL4	39.5646	18.1193	14.0043	66.8973	4.48109	37.522	33.3591	2.9778	32.5943	41.6125	24.316	33.994	19.6067	19.9932	11.6005
TTLL3	55.9445	55.1154	93.4991	126.44	95.5379	49.9603	50.3281	21.9956	106.562	41.1735	12.7795	50.8397	35.9491	41.1864	32.1559
LOC644841	-5.38676	-1.06088	6.03573	-5.35766	-3.50059	3.92112	2.7002	36.205	30.8615	22.0833	22.0953	12.8143	25.3806	30.0943	32.8248
TTLL2	0.571933	-7.02955	0.0430235	-2.73373	-4.1158	-2.38213	0.891428	6.25162	1.68321	3.28019	5.67978	4.79693	0.282079	-2.37268	2.61634
TTLL1	40.1608	25.2786	31.8812	47.9991	41.2369	16.3568	18.1274	-1.09341	28.6743	32.9229	20.2566	25.8951	24.4625	21.8313	2.4784
GGT3P	-0.349002	-1.65503	4.48569	20.4474	15.0353	-2.10468	2.02153	-0.489282	-4.64737	2.2824	0.184342	1.42916	-3.94536	-0.945874	0.349042
LOC390414	-0.0256226	7.84069	-2.01276	5.87494	15.8351	3.33778	-7.89359	-4.59276	2.04302	-0.629988	-2.2286	2.9869	-0.0705129	-3.02934	-2.81051
TTLL9	14.1066	1.97748	12.5376	25.8305	2.91134	-0.928866	8.44348	-0.665382	48.3775	11.521	0.58335	-0.0091929	4.38332	6.65769	-1.36594
TTLL8	0.922174	1.97788	-3.56546	-0.540144	-2.9357	3.73568	0.224131	-1.41692	-0.923484	15.5094	-1.89027	2.92737	-1.19684	-3.88027	13.9829
HP	-1.18139	8.2537	10.3473	10.4452	161.903	-6.692	2.53702	7.73679	4.47609	4.3651	0.183215	4.28015	-6.79999	6.79709	1.04645
HR	-0.218634	4.84893	-4.94131	-2.00827	-3.77784	6.97595	-6.53406	-2.79803	-0.810248	-5.33794	-0.776269	-3.69368	-4.78931	-2.12435	-5.32006
LOC644865	8.7608	5.32615	-3.48521	11.4335	5.32949	6.36225	-2.11994	5.16354	5.9395	7.58697	9.1363	9.04669	4.76217	7.29072	-0.53501
LOC642204	-1.38696	3.9388	0.822857	11.2095	1.77687	3.72379	2.22561	-3.83426	0.203211	2.00419	1.40047	-1.15742	0.150425	-1.58089	-4.2238
LOC642207	8.48411	9.91979	-4.24432	1.36098	8.03515	2.70494	-5.82823	-1.36715	-3.86221	-0.355143	-8.75641	-1.50463	1.95204	-4.69684	-0.0368065
LOC644869	66.6933	68.4244	66.4597	11.433	37.3607	63.6089	32.423	97.6779	51.8407	61.6479	63.3571	44.842	56.8941	107.818	74.9002
DCAMKL3	-10.1979	-3.45446	-9.67843	7.83899	7.46452	-1.65841	-6.26098	12.5827	4.98069	0.0701642	1.46522	6.91186	3.90892	8.2518	-2.33054
LOC642210	12198.5	15946.1	14104.8	8390.19	11118.8	10141.6	5460.23	14367.7	6754.99	9199.79	18126	10046.8	13375.8	15373.6	15946.1
LOC644873	-0.840454	-4.28259	4.6685	1.1487	0.602803	6.13241	-5.3696	3.72802	4.66761	-0.252315	2.15457	0.916191	2.78879	-0.643886	1.47188
LOC642212	3.91244	3.93727	-4.71217	-7.7397	-3.2551	-1.42451	0.344691	11.5294	7.72605	-1.23305	4.65297	3.53014	4.95102	-1.20471	9.27352
HLA-DOA	88.4696	26.7394	135.876	488.757	495.542	130.795	207.883	160.018	300.553	47.1091	75.9495	534.388	286.87	70.9379	250.89
HLA-DOB	11.9085	-2.104	10.9234	11.4446	11.8456	9.15838	15.7564	5.28167	5.49665	14.2031	2.95775	12.577	25.2573	7.59009	38.7647
IK	1724.86	723.952	1616.81	1274.68	1481.37	367.346	327.024	747.215	806.244	879.906	541.029	1340.01	1192.06	1102.79	407.153
IFRG15	4.39307	0.159079	1.96713	-5.10087	6.895	2.22684	1.43036	2.71004	-1.20948	1.86051	3.93908	2.69648	-2.08341	-1.1707	1.05208
VPS33A	76.4286	37.3566	57.3217	7.73335	31.3183	36.2097	28.6781	25.3495	34.911	55.389	32.1571	43.911	36.4836	39.3649	42.8325
VPS33B	84.8535	76.5684	74.7876	109.514	53.6504	95.025	79.6752	73.6989	84.7697	92.7813	70.3146	80.0225	71.1126	74.4455	83.536
LOC644856	-2.41253	-9.42482	-1.13856	5.52205	-5.31271	-0.360506	-1.35933	11.3701	7.18381	17.6506	9.36522	-0.92033	8.25654	23.1097	21.3667
LOC644853	2.69	0.910045	-3.48498	2.87903	2.71835	-4.29586	6.26344	7.84985	7.37953	8.47684	1.0409	-2.10086	6.7945	3.54141	5.11865
LOC644863	2552.2	2414.06	2388.82	1499.12	2137.56	1185.3	304.917	1815.17	748.086	1484.45	2545.7	2022.04	2219.74	1743.54	1301.8
NSMAF	225.894	432.765	345.123	289	310.933	428.914	404.471	345.418	475.181	354.939	547.219	291.854	368.842	316.863	336.114
DPT	-5.34476	11.0619	41.6005	10.4621	112.421	154.051	85.5843	0.596457	0.73031	1.36076	1.63504	8.00267	4.93526	17.23	-1.88045
LOC644889	15.8533	15.7582	3.50243	36.2978	14.6781	84.0208	3.90479	-0.643135	43.5105	4.24827	2.93103	-1.77246	0.611954	4.67012	2.90478
LOC644886	3.3545	-8.52293	0.177052	-0.929487	0.602407	-2.03864	-3.54304	0.204022	-0.0111534	-0.541018	-3.47266	5.32178	-2.09626	-3.50265	2.07333
LOC644887	2.6922	-2.0049	2.05866	1.14191	-2.73001	-2.85412	2.70762	17.8373	1.05054	12.4541	4.85199	13.6708	6.65022	6.75932	3.5193
LOC642229	6.7701	3.93321	-6.13964	15.8674	-1.06235	7.18087	11.0769	5.86606	8.2447	12.3629	6.81249	8.85625	8.223	-0.151017	7.73574
LOC642228	3.26001	-1.93392	-3.25923	15.8617	-3.11741	-6.11239	11.0764	8.8524	-2.10875	6.89569	-1.17711	4.0199	3.47341	0.580957	-3.66842
LOC644891	4.3971	-5.32993	6.03262	1.14236	2.71326	0.920752	5.30701	3.65186	-2.24635	2.92657	0.643813	0.726905	-2.04038	-2.11106	2.05377
LOC642231	2.46018	-7.09831	-2.01701	-3.92367	-2.11432	-3.18556	-2.04489	2.70429	-3.85724	0.34748	-2.73568	-2.09771	-2.15281	-6.18919	-3.67355
LOC642233	3.32882	2.24878	4.24187	-8.38869	5.28718	5.49576	8.66405	21.7583	24.3046	9.56782	19.4338	21.7543	16.4324	30.8322	12.9095
LOC654203	4.29021	-0.0202497	1.02912	-5.4195	-8.17503	4.96924	2.2386	5.13248	-3.08604	-2.10367	-0.508553	3.09359	-6.39295	1.96628	4.66717
LOC400388	-2.8148	5.12272	1.94597	-6.52577	1.99105	-2.06346	-2.32425	4.28118	6.56494	0.368837	0.148997	1.77629	-0.537615	-1.85947	4.22968
LOC654206	6.48384	-5.73276	-6.82189	2.75827	-0.539181	-4.86207	5.17864	-3.06295	-5.40709	4.56571	1.34129	-9.4009	0.359869	-6.28001	-2.03652
LOC654208	6.89215	-3.47076	-4.32421	4.47673	1.95529	13.3967	-2.23328	-3.50422	-2.94142	0.747727	-4.25069	-1.36753	-0.512859	-5.44276	-1.14555
MDN1	8.6708	18.1062	6.13132	13.2738	2.99764	2.04384	3.56791	2.36857	2.27447	8.94345	3.51279	12.8346	12.1604	0.479783	0.627456
LOC654209	0.74358	4.22721	-8.97253	-0.826229	-4.21456	-5.94552	6.57783	10.0678	0.58796	-2.13663	2.74211	-3.0351	-5.46923	5.84295	1.13454
KL	-1.27466	11.5294	7.74189	13.289	2.76378	-2.00707	6.66716	2.95797	3.57134	17.3214	5.93213	13.8252	9.54677	8.21941	0.47185
DR1	47.412	74.6001	65.5092	2.78164	14.0063	31.9767	21.1805	70.8539	39.9399	64.5624	104.323	78.8311	52.9959	46.6606	101.974
BDNF	3.39934	7.11922	1.22606	1.64546	-1.26028	1.35257	6.09236	-1.13461	-2.26566	0.698956	-1.67514	2.64877	-0.832547	-1.71527	1.79668
LOC654200	-6.28523	-0.469632	-1.20225	-6.13964	-2.33071	-3.86666	0.0673167	-8.72582	-5.85678	-12.0521	-9.08069	-9.67976	-6.21501	-4.18744	-2.32517
LOC654201	2.97306	0.47185	2.79145	-4.40732	1.95325	-0.922522	4.66365	-2.32919	-1.66979	1.73656	-1.65545	-1.91411	1.74173	-4.41201	-4.02813
LOC654202	11.3986	10.5712	6.05244	4.47789	-0.669604	3.46607	0.0671033	3.93027	12.1601	8.7463	3.3379	1.05337	7.69877	8.12621	20.9122
LOC642214	-4.32482	-2.00271	-0.918511	11.2029	1.77446	-3.11605	1.24674	2.86401	6.15275	5.90786	4.20708	1.47372	2.91578	1.01473	5.52122
LOC642213	-1.85238	-5.13631	-2.02632	0.154154	-2.11064	1.39143	-4.57493	4.76887	4.27399	5.139	2.29058	0.735436	-0.0560298	3.47214	1.423
LOC642216	1.33819	2.25235	3.08596	17.6424	12.4558	5.49772	0.344425	21.0046	8.67035	4.95827	4.02991	8.34988	5.85229	7.03226	11.5281
LOC644876	5.1564	-5.32282	-5.74374	1.14821	-2.74585	-2.85323	0.35139	-0.268414	-1.87866	2.71326	-1.1652	1.34157	-4.56566	-0.496382	-3.09996
KY	14.7614	12.2772	19.7186	-7.37552	-4.3168	7.59189	13.2919	-2.12412	5.94363	11.2026	13.8239	14.6744	3.16782	1.31819	6.92693
LOC642219	-1.38842	5.15595	-5.36539	-3.06384	-1.0625	14.9166	0.344195	0.23055	0.183977	2.00737	-2.0401	-0.499928	-9.01098	-4.32461	-2.07703
ZC3HC1	228.157	264.783	218.192	258.303	282.27	370.307	482.188	395.161	377.871	373.601	400.952	271.602	397.496	362.343	396.836
LOC644880	2.68899	-4.28356	6.80547	29.4694	21.1923	3.91119	1.98761	-2.83655	3.44862	-1.27856	1.94531	-3.43544	2.74468	-7.2101	-1.8818
LOC644884	3.90762	-2.7415	6.7993	-0.932551	2.01052	1.85484	20.4663	-0.0012685	7.92094	3.45115	-0.50702	3.90418	2.98903	7.17679	1.64703
LOC644885	-8.86122	-4.28323	-2.84357	15.5032	-4.78735	-4.25345	-7.75719	-5.43487	0.571406	-8.62624	-7.11856	3.72628	-1.27087	-4.10098	-1.22399
LOC642220	-1.85266	-5.41888	4.24149	-1.06827	21.3931	6.04043	-1.14908	7.46375	5.91312	7.37786	5.31689	1.56503	-2.75449	9.17819	4.93315
LOC642223	5.49047	-1.37463	8.75846	2.90243	5.27251	4.28406	1.24642	11.0786	9.05281	4.38494	8.8438	7.69182	7.4876	12.4636	5.51365
LOC644883	1.24148	-2.74004	-7.26894	-6.79092	2.01093	-3.91376	-1.35813	2.02735	4.19457	-2.74478	0.449109	12.1692	-3.83567	3.34718	-0.842923
LOC642222	9.54562	4.582	6.34423	15.8637	2.45766	3.73479	0.343323	-1.20488	-1.23317	-0.438357	2.72268	2.23189	3.73682	-9.24071	1.44954
MDM2	2.98705	0.489053	-0.408682	4.65011	4.91704	3.15838	1.9331	7.8584	-3.50627	0.078565	5.78274	-0.485013	-1.33594	0.305216	0.0951506
HLA-DRA	4694.6	1676.16	5294.62	7102.66	7670.98	2383.3	3388.19	4054.59	4471.29	2783.85	2484.25	10489.3	5369.41	3086.48	6396.39
MDM4	17.9421	14.7665	18.9687	2.99812	4.38606	40.4276	7.84581	1.64559	11.4002	3.50354	12.8298	19.9897	14.4126	3.17464	2.03104
MGC33894	5.86395	-5.62534	-2.94395	13.2784	-4.66289	0.208068	0.0780752	1.41408	-1.38925	-2.78941	-6.80053	-6.13823	0.822716	-6.12525	-0.0115738
MDM1	23.356	10.1522	17.0893	1.60041	3.69952	3.0169	5.34813	1.84948	3.41995	3.58568	1.133	6.34164	10.1094	-0.132685	-0.0178483
LOC654230	-2.24871	-0.479144	-0.615439	6.03189	2.93737	4.96888	0.066566	58.9778	15.7469	9.81596	8.76765	8.74221	17.0007	11.8612	11.2177
SH2D4A	170.192	152.373	95.8908	187.833	94.3796	190.771	218.381	95.025	119.424	142.031	127.467	118.668	81.8553	133.128	157.988
SH2D4B	3.83068	4.44035	-5.42819	-2.02433	3.06476	-2.73458	2.50393	-1.73839	-0.640605	0.253947	-0.55834	-2.64231	-3.45765	-2.80845	-0.139299
LOC654235	0.743271	5.30497	-4.6432	-0.827091	-2.33241	-4.78985	-0.000955442	3.17217	3.16454	-1.68787	3.32923	4.48431	-2.84222	4.39425	-0.223258
LOC642248	1.14121	-2.00188	-3.25686	1.36076	5.28488	-0.241776	5.84422	8.58738	2.00835	-1.15463	3.90642	1.22373	14.2774	3.17485	9.12768
LOC642250	3399.05	4589.51	4275.78	2335.5	3123.59	3596.81	2552.89	2939.84	1984.59	2396.94	4028.08	2282.26	3800.67	3389.52	4096.36
LOC642252	1.19962	1.82658	7.5589	4.59996	1.47874	-0.991702	1.94666	1.95642	2.02679	12.2259	5.28643	6.20965	6.19572	6.17735	2.70302
MB	340.321	109.705	396.42	258.21	368.866	121.434	157.244	429.182	210.332	238.045	156.381	230.842	199.138	437.59	73.7246
DSE	179.504	175.023	202.975	111.794	144.445	123.826	163.958	218.654	191.365	137.743	206.029	226.719	187.443	147.277	207.031
LOC642255	55.4076	31.5411	49.9983	92.7151	67.9677	48.8747	9.37038	59.9171	30.7198	32.9123	28.5011	30.6502	32.5312	45.4425	40.3885
SPG11	958.25	903.296	1024.22	815.104	1221.48	603.339	464.388	584.86	878.891	844.231	804.006	889.856	666.843	509.889	449.466
DSP	183.859	253.868	178.645	68.5938	106.542	311.285	43.7184	69.2173	62.3811	143.389	172.576	117.579	136.191	56.2346	78.4721
LOC654220	-2.2491	5.91586	3.52765	4.47685	7.58199	0.73933	-2.24181	14.8455	3.90587	9.64436	10.3212	1.43081	3.91263	6.24614	28.4173
DST	3.10764	23.1402	17.3423	-3.27817	5.16258	17.107	21.4889	20.8258	15.3154	7.85143	39.2735	1.87254	24.3665	12.8395	21.77
SH2D3A	29.6811	45.8854	39.4694	59.7446	40.062	86.313	39.5709	51.4109	12.1428	57.5262	51.3234	17.3372	21.3673	76.5505	100.255
LOC654222	4.39382	10.8294	4.68218	1.42916	-2.33182	11.6052	5.17913	-3.51248	0.226223	-3.05959	0.373172	-1.20879	-2.12938	0.178423	-0.952628
SH2D3C	8.01528	10.1805	14.7635	1.61462	3.45397	28.9768	20.5148	1.25118	4.37517	3.76773	10.78	17.7382	8.1222	6.52146	9.70052
VPS37C	1193.85	1136.06	1240.43	1355.97	1217.4	1700.42	1561.55	1181.72	2398.24	1959.16	1446.34	2311.97	1754.69	1345.93	992.524
LOC644899	-3.47248	4.67152	-3.48135	18.5623	0.603478	-7.25522	5.31576	7.0007	-1.65899	-1.6888	3.54771	-3.08922	-4.71217	-1.85238	1.22527
LOC642236	50.1837	46.5465	54.1997	21.3713	29.5475	33.6342	23.4075	50.717	24.2881	30.4761	80.9978	23.7603	38.007	60.1854	41.7477
VPS37D	60.6954	99.1614	47.1802	16.5239	60.2356	89.8264	105.349	50.9519	82.2663	36.8382	70.066	48.3416	77.0801	98.8377	98.1155
VPS37A	52.535	73.3584	40.2229	72.8429	35.8195	67.1716	120.849	104.996	43.8605	95.4911	75.931	84.7383	82.8475	88.4759	102.883
LOC644897	-3.47356	2.15748	-1.86427	-0.925665	-1.2545	0.587465	8.96096	1.47255	-3.88335	2.37184	-0.938961	1.44977	0.476689	2.00072	2.2572
LOC644898	5.26955	14.0235	9.03766	0.471601	0.604618	-0.365095	33.7993	-5.34252	-1.18319	-3.86919	3.65018	-6.49518	-0.93725	0.557657	-2.11664
LOC642237	-5.94624	-4.1906	-0.0726173	6.03769	1.77873	-5.0954	-0.527209	1.41285	2.54283	-3.41972	3.72802	-5.03804	2.07061	1.39941	2.23697
VPS37B	306.385	447.773	288.461	351.553	372.064	961.865	612.547	375.093	522.764	657.564	367.895	324.409	249.785	356.621	526.142
MGC18216	73.7228	141.517	183.005	199.42	167.88	158.812	60.522	7.75061	112.609	95.6793	64.177	80.7114	80.4684	22.559	7.74314
MGC4172	132.483	133.79	111.869	121.338	121.675	159.011	148.208	164.706	191.784	135.848	130.968	94.8909	88.3739	153.755	155.056
LOC642243	-1.38744	-0.844719	4.96311	15.8656	-3.33261	-4.3034	2.78434	-1.1564	0.482815	0.34555	1.99894	0.353429	4.1186	5.14315	8.46455
LOC642245	-1.38761	7.73335	8.24935	-8.38794	5.1235	-1.50109	-7.73016	-10.1949	-6.96648	-0.508681	-8.52398	-14.7846	-4.59018	-3.91583	-7.74716
LOC642244	-5.41088	8.45986	-6.13823	11.1142	1.77831	8.22054	-2.04585	2.01713	-1.20173	3.37649	4.4859	-0.260341	10.4438	-1.68508	1.41309
BDP1	4.39217	7.0174	14.7685	13.3813	-4.1847	18.8746	15.0582	-5.30584	19.6897	-0.0287287	-3.93479	5.16368	9.34729	-5.85194	0.579958
DTL	5.87288	6.81133	11.2184	14.927	3.47365	26.7795	9.44301	6.38438	8.35405	12.5586	38.7789	19.6933	24.1314	20.546	63.6809
MGC33846	20.4617	18.1276	26.6972	7.82273	2.99964	9.54622	18.9699	4.67793	14.9299	22.8208	23.5879	7.38153	26.0272	37.2809	11.3855
NP	150.725	98.3905	83.1512	74.0354	110.538	119.714	220.199	138.543	90.236	141.952	88.5019	146.783	132.006	149.461	184.836
LOC654252	1.45911	-1.2753	-3.46529	6.02955	5.9444	2.2301	3.33408	1.75348	7.17595	6.37243	3.37133	7.70079	6.48172	-0.506705	10.8204
COL15A1	12.8	33.5804	40.9535	18.7791	29.8666	91.951	54.9287	23.3983	-2.8358	3.57312	22.1106	28.7581	14.4963	-1.06987	1.77359
LOC654253	12.8202	14.112	7.62283	10.8166	5.94455	23.4846	13.496	4.23935	1.73836	5.15463	-3.25606	-2.81331	-2.0067	-2.69137	1.24134
LOC654254	2.97237	1.94705	4.66873	7.71292	21.2741	6.91297	-0.00110167	2.9109	3.36699	-0.0697115	1.13212	1.47466	7.17595	3.49969	2.04159
LOC654256	4.39645	5.92329	1.03924	16.7675	10.3133	2.23038	11.8718	24.8693	9.45118	9.15112	5.19078	9.92202	16.1901	16.0301	9.04781
LOC642269	6.41098	-1.31924	1.65076	11.4023	6.6041	4.96002	2.05575	0.484958	0.49754	0.398926	3.27077	-2.34397	2.407	2.11537	8.76749
LOC642268	-7.992	2.91788	-4.23932	2.88976	15.4878	-1.43343	2.78398	0.565471	-2.12238	-1.76321	0.176138	-2.00252	-0.0198906	-3.25463	12.5738
HSD17B14	11.0977	-0.647177	6.01579	-2.85628	-4.63793	5.16191	20.5471	-2.62263	11.0691	3.3444	2.99519	5.94719	-1.16627	6.03468	-2.82284
HSD17B13	22.97	66.2997	122.846	91.7384	35.9478	6.02607	9.85024	39.6698	24.3488	37.0403	6.59368	52.6492	31.1346	79.0406	32.9646
HSD17B12	1065.57	902.424	1025.36	848.751	952.963	609.772	839.748	917.501	732.404	1008.74	911.254	825.592	805.758	780.645	754.598
HSD17B11	299.256	180.155	154.813	118.759	203.556	64.472	18.1278	187.657	65.4661	80.8626	164.922	121.834	79.1392	165.247	83.437
HSD17B10	84.7396	114.474	59.4864	105.231	110.518	148.096	109.592	155.189	69.9536	106.263	144.028	77.8521	83.146	148.444	270.365
RNFT1	68.433	17.3387	34.4977	-0.978874	42.488	9.45882	2.02724	10.3426	0.203973	6.26404	26.009	32.804	22.2374	4.76035	7.49045
SPG3A	130.335	65.4142	84.3119	60.7165	68.0693	47.6405	55.7116	62.7584	50.1424	52.4973	55.6999	92.3582	67.2668	102.473	18.0195
LOC642276	-9.99925	8.46656	8.84647	-3.10459	2.36379	1.73101	-4.56883	-5.44233	-8.56791	-11.5089	-11.7156	-9.79903	0.371255	-3.46095	-2.02027
SLITRK2	5.48957	-0.625208	5.90786	-2.101	1.44804	-1.16856	5.16743	-7.7397	-2.5186	-6.8124	-7.67134	-5.41482	-5.61862	-5.05944	-8.95185
SLITRK1	3.74598	0.007555	2.56218	7.69438	-2.97637	7.99078	4.16993	4.31812	-0.331623	-4.22628	-2.71555	0.327526	-3.97356	0.824034	4.71405
LOC642278	-1.85919	4.58603	-9.23562	-1.13885	0.59142	7.20328	10.3276	0.181064	-1.8798	-5.34978	-3.42633	-3.47044	4.02969	0.211196	-0.228386
SLITRK4	7.82503	4.01572	7.60464	-4.56981	7.21041	3.44767	1.14504	1.9833	-2.11713	1.3707	-0.440873	1.93993	0.174077	-0.0716603	-6.23278
SLITRK3	-1.7643	-2.95758	-6.83509	0.333201	2.74487	9.66808	2.24788	6.26404	8.937	2.45433	3.51202	6.38407	-0.48882	0.352219	-1.91504
LOC642277	4.62701	2.91766	-2.0343	1.36214	15.4144	-2.10685	2.78322	-1.162	0.373288	-4.2329	3.07276	3.08315	4.2746	1.85495	-3.87446
SLITRK6	30.4488	47.3894	21.715	-8.5365	12.5827	19.6904	33.5915	53.9025	100.728	40.2411	72.3098	28.3178	34.1247	53.0668	20.0224
SLITRK5	7.38017	6.47745	13.3741	5.12454	15.0297	5.92429	-2.94308	3.9282	6.56073	-0.241457	2.01801	0.823285	12.2839	16.5074	-2.06436
LOC654249	5.15739	10.5725	-3.46129	6.03005	2.93769	0.741112	11.2967	0.588135	14.8449	4.1907	9.04384	1.3969	7.72821	11.8407	9.18638
LINGO2	10.5344	2.88289	10.4187	-2.42487	10.0117	-4.02961	22.9871	2.44976	13.997	7.72377	-3.44558	21.4789	12.1826	11.6	-1.41281
LINGO1	1.22907	-4.25373	-7.0052	-1.86971	-3.48799	11.1045	2.73251	1.45003	3.47069	1.46203	-1.75911	6.26235	4.28501	-0.514125	-2.73635
DUT	43.5647	75.3091	53.076	35.5966	41.1105	57.2743	100.826	49.4946	31.5378	41.2309	88.3333	44.3738	42.452	70.9957	88.8797
LINGO4	9.27211	-2.50968	4.96427	40.9288	-3.48665	0.737582	12.7968	39.5819	22.0797	33.8371	5.27833	31.8521	20.4489	11.4481	22.0744
LOC654244	19.0073	6.53609	10.0187	-2.23589	1.49896	4.12244	-0.44723	6.95312	8.13002	6.45734	6.23713	12.4582	12.0502	6.15174	3.45978
P8	204.938	139.046	241.93	381.753	212.1	89.914	169.216	167.755	123.972	278.316	105.258	196.602	194.094	324.904	161.805
LOC642257	-0.926832	-9.99925	-0.0337934	-3.06677	1.86148	-4.56911	1.32717	5.75101	1.3401	3.47873	-3.74692	2.91595	0.9182	0.337561	2.14838
LOC642263	1.3369	-5.63025	-0.351002	0.167869	-2.10506	-4.32224	4.63148	1.04303	-5.83844	4.37948	0.0669363	1.01587	0.462349	6.56004	1.99643
PC	26.0108	20.1823	31.9936	27.6355	48.8769	35.1156	54.5165	30.8223	53.6129	27.7678	27.8191	38.1446	26.3296	28.8599	20.5219
LOC642265	-0.0394506	3.9355	-2.02062	9.04669	-2.10468	-4.32073	-3.54731	2.03908	-3.85396	1.37904	7.37592	-0.474639	3.45611	-3.87549	5.75871
LOC642267	-3.70478	3.64862	14.9585	4.68734	11.8241	7.57039	1.24856	2.66038	1.44249	1.6735	2.78222	-0.995036	2.28462	0.55141	0.458722
MDGA2	-2.60541	-3.53515	7.22082	-2.41221	2.99687	-7.66345	2.46394	7.72774	-2.07703	1.34921	-0.438049	-3.03159	-5.3471	-1.86633	-1.39746
MDGA1	7.93429	5.27053	11.0956	-5.34139	8.84412	6.79771	9.05324	8.44074	7.45815	10.8279	4.23686	13.9775	5.84033	-1.19684	4.01563
SPG21	24.7688	21.7854	16.7991	18.9716	22.2828	13.8059	4.9544	18.0064	12.2134	12.0284	24.6658	15.1605	19.2018	14.6386	9.95974
SPG20	21.0072	34.1345	33.6163	44.0553	9.15006	18.4906	58.7341	19.7033	54.3218	47.1034	18.3737	34.2266	25.757	32.1571	18.0224
RGSL2	-2.81279	8.75657	7.69389	5.32595	11.3687	4.58883	-3.74692	12.5376	5.29832	19.4395	2.9882	6.6778	13.1752	6.4751	12.0604
LOC654155	19.6035	23.3622	16.5036	25.6553	29.5906	35.663	77.3096	28.3994	29.019	28.5028	28.7922	23.3928	20.4707	34.3255	28.2471
RGSL1	-2.81265	0.374102	-5.62925	-1.17456	-2.14663	8.13459	-4.25159	0.602309	-0.470764	0.362391	1.64876	-1.27063	-4.28647	-3.10206	-1.37685
TXNDC10	58.8156	60.5278	100.265	65.3966	67.5914	44.2297	10.5662	84.9562	70.5353	68.6788	96.9166	53.4915	50.6386	34.2101	39.2351
LOC642169	-0.0371686	-5.41264	1.45421	5.27193	0.564025	7.73574	2.22799	5.17276	23.3622	4.97951	-1.3679	3.91882	2.15514	9.19369	7.5806
TXNDC11	46.8557	70.3491	76.5684	94.9741	56.3481	106.041	104.217	67.5696	101.034	101.145	58.7341	73.8021	65.771	43.911	69.9754
TXNDC12	1449.05	1190.2	1469.09	1493.28	1446.34	1457.47	1089.58	2026.95	1505.76	1944.8	1786.9	1757.85	1586.27	1616.81	1225.59
TXNDC13	102.439	82.8485	81.3768	50.3285	48.3701	41.9964	81.4515	45.8536	47.996	66.1683	67.962	87.4973	66.1476	47.5812	35.7702
TXNDC14	605.34	785.235	669.746	482.188	802.858	741.428	751.028	519.868	439.9	606.746	534.388	540.723	395.567	420.32	796.127
TXNDC15	19.8879	24.6802	18.8817	-6.13603	1.01353	16.2432	22.4616	14.7539	21.3995	19.2087	18.4714	30.3351	22.8173	16.7675	9.5546
TXNDC16	6.27023	14.1235	9.13652	-1.19872	2.91628	4.7733	3.53165	6.65947	4.68891	9.82907	15.8368	5.30149	-3.4936	-5.12717	-2.02435
TXNDC17	1180.92	2083.86	1317.08	1034	858.08	1831.6	1616.81	2053.63	898.9	1733.36	2774.95	1272.71	1978.82	2137.56	2847.16
LOC642173	6.7863	-2.00299	-0.438049	15.8708	23.5879	-3.11433	-1.15222	7.22037	9.16444	5.18252	6.77727	3.51354	9.0502	7.01601	7.46552
MGC45800	-5.82012	1.4379	2.25953	-0.502923	2.99472	-5.3365	-3.66225	14.9151	2.7197	0.162956	7.57333	9.65018	4.23313	14.1167	9.0374
LOC642176	-5.41415	-11.7306	0.736625	-0.617167	-4.69711	-1.42952	-2.04791	-4.55938	-1.9058	-1.38871	-5.71161	-1.3607	-2.06706	-3.42204	-5.41029
LOC642178	6.46828	11.1195	1.45019	-3.92116	1.78412	1.38829	8.66727	3.25834	5.84473	0.480205	7.74859	1.04442	0.895794	-3.42491	1.38516
SLC34A3	-0.536319	6.57168	2.54055	1.22816	7.19813	7.59766	5.13463	4.37861	4.97162	0.929712	4.92022	3.50495	5.66475	2.4633	11.8355
SLC34A2	99.9937	138.071	119.449	225.468	246.362	120.031	53.1317	96.6807	83.8413	117.253	61.9009	154.71	100.943	51.4687	25.4609
SLC34A1	-1.76218	10.8247	6.57404	-3.49569	-8.52215	9.7448	-3.91166	-1.77603	-7.24751	-6.29084	0.21309	-3.05288	-9.89194	-12.8274	-7.26049
LOC654147	6.56004	-0.475908	8.49306	2.75795	-0.670698	0.568785	2.23659	-3.45433	4.6291	-0.672206	2.25832	-3.83426	-0.355143	-0.537905	1.55163
TIMD4	1.02207	6.14588	-0.918957	-3.53344	1.24408	1.74702	1.23076	3.92322	3.53915	2.69	4.28824	4.62214	1.40295	10.1412	5.8717
MDS1	-9.2789	3.89737	-0.0708547	-4.24292	-1.36878	-3.8987	11.1205	-5.39329	-2.83287	-7.68681	-0.623341	-1.91728	-9.63131	-0.625208	-2.78706
LOC642161	3.90306	2.03554	8.76003	8.75415	-3.25334	0.737261	3.3327	11.0668	2.88447	7.92197	10.3276	8.46847	6.02577	8.21256	6.64518
LOC642164	2.46004	2.91595	-4.71147	0.150834	1.85302	-3.10184	-3.55085	-3.91515	-3.54026	1.64664	-1.41176	0.605709	-2.22425	5.32821	-0.477037
LOC642166	2.88464	-5.05305	-1.14523	0.1519	-4.69644	6.03749	7.36771	-9.2705	-10.4523	-7.90548	-8.00678	-7.67866	-9.79772	-12.0703	-5.12558
LOC642165	-0.922898	-0.0609652	8.76712	15.8738	-2.11417	6.3852	2.78042	3.17171	3.73697	-0.252967	5.87962	3.47605	3.33467	1.40169	5.28647
LOC642168	3.18061	-4.19752	5.49315	11.1958	4.93388	-1.42913	-5.83293	6.04573	4.39269	4.2808	3.47812	-1.22332	-0.0613403	1.33392	1.01226
LOC642167	2.46434	-5.4256	3.00062	8.75365	31.9492	-3.67601	7.29509	3.52611	2.15457	9.16045	1.13454	-2.14518	-3.57034	3.47587	5.9404
LOC642160	1.14134	4.9809	2.05237	5.2757	12.5379	0.738972	8.03293	4.19475	1.76355	-0.0184992	2.27711	1.7494	-0.0699346	-0.242055	13.3757
LOC654174	19.4422	8.36385	17.7181	-3.15331	5.93638	2.44821	-2.47957	1.92358	2.17675	4.40708	4.57307	4.35106	8.55121	4.75945	8.19928
EPHA10	1.02716	6.86205	6.77062	26.9274	11.1647	6.16263	7.91752	1.28232	7.6323	5.96448	3.25865	3.86541	3.43452	-0.963157	3.31791
MST1R	35.2984	82.6709	102.346	84.9399	12.451	135.891	107.263	47.3614	65.6785	73.6715	48.7312	48.8254	58.9778	83.3281	77.901
OSGEP	49.5049	52.5256	40.3369	174.481	12.5785	45.4202	126.1	40.3299	67.5134	64.6717	50.567	53.4952	56.0941	64.3749	82.5639
LOC654172	-5.47248	2.89429	-1.63303	8.96465	3.94757	2.42121	-4.03828	8.67162	-0.185876	7.52541	4.06816	4.82302	8.52315	5.75676	1.89629
LOC642194	-0.0382281	-0.840454	-8.43976	1.36181	10.0581	2.71277	0.343986	5.13484	3.90513	5.19095	2.96749	-2.01654	5.85948	-2.76688	8.36481
LOC642197	137.08	99.5645	95.5958	54.9868	41.1806	117.428	90.7159	184.558	79.265	99.3984	143.429	115.344	133.236	205.9	151.723
LOC642196	-3.4365	-10.4777	-2.50178	-1.06959	-8.00004	-1.42575	-7.74046	11.1165	4.20449	-1.92509	2.46101	-0.240062	0.179362	4.25535	2.61445
LOC642198	7.74136	7.19576	13.7475	-6.20656	-1.13718	-1.42548	2.22568	-7.73541	-0.924071	-7.20807	-6.49827	-7.36603	-10.4644	-8.70816	0.650504
SI	1.12801	-3.19762	3.40221	14.5082	3.3152	11.5833	0.502242	-0.0623386	1.84289	0.590363	-3.26947	0.393267	-3.91042	2.37232	0.984784
DYM	396.995	250.529	324.245	299.884	283.969	264.268	200.576	350.716	221.093	313.645	293.04	292.376	348.661	317.841	308.236
LOC654163	9.04614	-0.0447571	0.17973	-0.271502	-5.85502	-5.11644	-1.22678	-5.32993	-6.49324	-7.5363	-2.06684	-7.73757	-4.64858	-1.78229	-6.22942
LOC654164	0.742938	-2.40547	-0.629339	4.47713	7.5923	-0.91979	5.18292	24.6941	16.9724	10.4224	20.6244	13.8961	13.2043	15.244	26.7632
LOC654165	4.28868	1.02822	-6.41967	-2.10589	2.93336	-0.924554	5.93417	3.33762	6.90254	4.97735	9.46133	0.359065	6.6889	7.19479	6.65308
LOC196120	2.94206	-7.24255	-8.9997	-2.1509	8.21979	-6.96	-0.674763	6.36179	4.62571	9.34902	-1.06065	-0.924707	1.97748	9.04812	-1.87288
LOC654161	1.98077	15.1425	7.60968	6.04505	-4.23273	11.1187	8.00748	-5.31457	3.35116	4.18706	4.36016	-2.01164	1.977	-5.02885	2.25408
LOC642183	2.4633	-0.0625145	8.76813	59.0778	32.1128	6.04308	7.36464	11.4224	5.86134	17.3265	4.8508	7.6222	13.8945	25.391	18.1219
TF	77.1006	177.197	346.434	130.746	824.487	206.384	614.984	242.111	132.049	189.625	126.274	53.8297	906.053	208.797	517.097
TG	2.97569	3.48666	1.33425	7.57256	10.4342	6.39437	3.49463	5.90887	15.8467	8.76425	16.937	5.48096	11.3846	9.92603	9.82317
LOC642185	5.74391	2.03519	-8.58933	5.91971	-1.1374	-0.230333	4.64257	13.997	25.2614	9.43861	16.9393	12.3676	11.0674	12.2775	15.0279
LOC642188	2.8767	-0.840902	-0.366906	11.2091	5.27015	-3.8501	-4.57624	8.25654	6.76547	4.46812	7.73609	8.00361	8.36431	7.73405	5.13463
TH	-4.83009	3.15267	-6.38048	8.34862	0.541741	2.6655	11.4123	-2.0905	-2.56459	-6.22269	-3.77735	-0.763353	-5.30745	-3.41584	2.19901
LOC642187	-0.923111	9.92036	-1.14572	-1.06974	-2.10938	6.04295	5.48914	-0.671467	-7.28577	-3.92692	0.461177	-1.36085	-9.82546	-2.75791	-7.89583
LOC654159	-6.27962	-3.46529	-1.20471	-0.82006	-6.1578	-0.367568	-10.3043	0.597979	-5.13077	3.44912	2.05377	-0.502063	1.77909	1.76061	1.86387
LOC642181	4.65344	-1.37756	-4.71482	5.28082	0.565924	-3.67317	1.24586	-9.00328	3.2604	-6.17762	-4.79377	-4.6885	-4.24216	-4.21904	-8.5991
PCSK2	-5.03521	1.77536	-6.25556	-11.5358	5.15463	0.342058	-7.21829	-1.65666	6.35616	5.92481	-3.51026	-5.01656	-4.25875	-3.87509	-2.84557
PCSK1	4.28392	5.12416	8.53701	-0.308343	13.8505	0.6753	-3.22798	4.09313	3.19587	0.599325	-2.13196	5.94557	-0.829144	-0.665637	3.35948
SLC7A14	1.2439	1.37929	-6.29883	27.518	5.66586	9.67383	-1.66776	1.85569	1.45421	-1.87027	1.55855	0.913702	-5.29738	1.34451	6.35818
PCSK9	5.86033	-3.9161	-1.23285	2.96158	-7.75286	7.82698	12.9107	-1.67896	0.455732	2.28392	1.35958	2.05558	5.85644	-2.72412	-0.347484
SLC7A13	-6.8085	-2.0902	4.24827	-4.56375	5.17168	-0.266892	-8.93549	-2.01641	-2.15605	-2.09712	2.24878	-2.94308	-6.4158	0.21418	1.45316
SLC7A11	-3.52961	-3.83596	1.25079	14.111	1.46094	2.90374	-8.93778	2.88996	1.75021	7.18667	1.23199	11.2011	4.20841	3.07661	0.998539
PCSK7	74.8938	115.097	61.3016	160.645	180.808	227.832	247.804	56.4325	126.038	109.311	114.598	92.7894	109.2	85.6865	178.445
LOC654191	110.881	91.3863	110.115	150.934	113.372	84.7396	106.09	26.1034	150.497	158.256	58.2547	353.749	191.768	85.8475	20.822
PCSK6	3.967	-0.308677	2.08813	0.181047	3.1599	0.262786	0.525276	2.29017	-1.20599	1.18966	0.721134	-0.747603	0.1631	1.44807	-0.91591
SLC7A10	-5.05111	-1.26902	-4.78831	0.370522	15.0126	-1.17794	3.93841	5.47797	8.57746	5.5203	8.48411	1.63736	3.45889	6.66855	2.2661
LOC654192	5.16049	5.91312	4.67704	48.8417	5.94233	-0.367015	5.93392	-8.38794	-3.10141	0.200486	0.586186	-2.60492	0.606065	0.225645	-1.92155
PCSK5	279.934	123.94	145.514	186.735	91.4751	59.4009	230.127	63.8138	138.301	167.804	59.7391	197.058	138.113	96.0856	8.74915
PCSK4	17.3478	15.957	13.2968	71.8354	5.1486	26.7632	78.6149	5.11914	64.1828	33.3384	-1.25779	20.4676	30.2585	36.9667	13.3766
CLYBL	45.9688	55.0619	57.5341	52.6131	54.1099	64.5641	63.6835	64.2962	74.6742	54.9669	92.7919	35.3958	65.0245	97.5328	100.719
GGTA1	-4.26685	-2.80322	-3.48896	2.73677	-4.5667	-6.68332	5.2757	-3.06145	-1.40118	-7.53505	-3.93651	0.645431	-6.98826	-5.42207	1.55803
LOC654194	1205.32	3000.1	1758.71	1535.74	1854.63	1312.97	748.538	3240.61	1654.1	1686.9	4075.13	1502.28	2039.77	3240.61	3201.75
GNGT1	-3.11118	5.32949	13.3977	10.548	2.28085	-2.12117	1.86188	-2.33584	3.49011	-0.0302854	-6.81044	-0.626856	-3.32876	-3.56169	-1.21272
GNGT2	6.138	10.6618	14.4246	8.9616	9.34962	12.3647	13.4943	4.10104	12.999	5.51979	8.25552	10.5504	7.83567	6.92077	6.22736
HYAL1	14.2768	42.2376	17.9696	12.8973	36.8535	60.4264	33.3499	29.5996	31.8074	40.5555	29.4426	39.3862	14.8994	29.4331	30.5576
HYAL2	18.3991	45.7226	36.1921	24.7934	34.535	74.1435	56.6446	48.08	20.0362	37.9898	48.8831	23.3946	25.2352	25.4516	55.1939
HYAL3	13.0223	30.7573	18.2902	53.1056	0.360067	54.8899	34.5939	6.5629	42.4847	28.2776	7.20873	8.44612	18.3792	7.60371	16.2199
HYAL4	16.341	-4.21831	8.96392	22.236	2.02683	13.4751	16.235	0.241304	7.36387	9.16121	-4.65431	6.79771	3.91951	-7.73363	1.46504
SSSCA1	57.0515	33.1157	27.3177	75.6409	8.74252	27.3935	18.5992	82.1694	19.3037	32.4468	65.3511	39.4893	29.8688	58.612	60.0551
LOC654187	0.743376	1.94893	11.6826	6.04646	2.93314	8.66761	9.12687	17.1441	8.94607	2.68407	5.94639	4.57286	6.25853	2.07191	1.9902
LOC654189	16.4058	14.3915	22.5343	-0.477107	5.26886	12.9895	12.7549	22.3032	19.8407	24.3718	14.8376	27.3168	26.4634	26.1672	12.1737
PPYR1	-1.68038	-4.64133	-8.96088	-0.834394	5.66874	5.27391	3.34287	5.1532	2.01026	-3.87475	-1.76218	-0.268354	6.76635	1.36698	-2.80518
LOC400299	-0.658902	7.58397	1.94294	46.3021	-4.23676	0.601351	11.8384	9.91399	2.36622	-0.964955	1.99265	6.66786	4.10351	-1.1778	6.77225
LOC400298	-2.07531	-0.0434301	0.552212	-6.5314	1.02614	-4.28187	5.91679	-0.220375	1.94705	-3.67379	-2.76547	-8.52741	1.46928	0.147411	3.45131
IGHMBP2	7.83795	20.7269	13.5072	1.0369	4.11159	19.9902	30.6456	1.72717	12.458	19.9155	10.8373	6.69105	8.47886	3.37159	26.1156
ALS2CL	11.2724	7.78314	7.09057	23.5335	0.58396	38.2696	19.816	2.25714	16.3276	9.41226	10.6244	5.07934	4.66894	5.37784	11.053
PLEKHG4B	-5.06533	-8.77159	-1.42749	-2.93609	-1.57788	-1.06006	-0.0478714	-9.99743	-5.94124	-3.86727	-5.03287	-5.72209	-8.17662	-7.70479	-7.98775
LOC497256	-1.39868	4.97735	-2.95706	2.74586	-2.60444	-5.33818	-1.13856	12.9087	3.9041	4.24199	-1.06659	3.07637	3.26014	3.92525	6.03032
XG	-2.78004	0.171594	-7.78133	-2.05901	2.37583	1.15176	-9.89938	2.15733	1.99717	-3.25781	-5.354	3.54631	1.95752	-5.36343	-2.04759
XK	81.5944	15.4066	23.9089	10.0109	24.119	5.84318	3.25458	18.1999	14.0152	35.5632	22.1304	35.56	43.7058	9.83196	4.63241
FLJ10490	9.45478	23.6593	20.0234	-0.930731	-2.61324	26.7394	10.6662	4.64444	1.99118	5.66608	9.54573	19.6811	11.1066	24.4002	10.3323
GLB1L	447.5	143.818	320.941	836.331	397.305	53.1658	133.501	282.177	185.946	289.622	83.3512	400.6	268.766	262.479	64.8212
LOC390466	119.965	141.556	126.623	19.8765	34.1208	44.8553	24.0105	71.0991	16.9616	40.6501	163.457	100.401	100.847	78.0496	114.907
LOC150786	7.0174	-5.06366	-1.93321	1.32272	0.15956	1.01744	-3.903	5.93417	3.92366	-2.05195	2.26101	1.3742	1.05232	1.73897	3.33315
SGK269	-7.79224	-2.86038	-2.86282	-3.43968	-0.444979	6.65999	-5.82559	-1.40712	0.462148	2.24111	-3.33322	0.203211	2.46298	-0.515022	-2.79368
DKC1	421.147	679.663	675.74	498.242	586.964	797.558	813.599	454.402	633.477	537.408	847.186	482.423	534.277	545.215	940.597
LOC389457	11.8372	6.13528	7.92005	-2.13848	5.47717	12.1959	9.65695	0.332802	4.26405	1.44707	0.16942	8.95171	14.3005	3.45874	11.4013
LOC389458	-1.2503	-3.49388	7.37081	-2.13954	14.7722	-1.20677	-0.969336	-6.98879	-7.90023	-6.99861	-7.28644	1.98255	-3.90177	-2.09397	5.11895
EBP	194.874	106.069	229.67	134.001	284.389	174.654	77.4263	124.806	132.483	156.375	156.185	120.527	160.816	123.394	138.649
ECD	53.3871	50.9304	53.1794	-0.368092	7.83871	30.035	26.3175	43.6855	15.9268	29.5533	44.3352	36.0722	40.3974	23.9674	33.83
PHOX2B	0.536535	0.072729	-3.44655	-4.01894	-5.05906	-0.948134	6.62405	-5.25557	-2.07999	1.06359	-1.6664	-1.35794	2.22613	-2.74654	-7.0466
PHOX2A	-1.66454	-3.89468	3.45846	30.1748	9.3703	0.916708	-1.37919	19.3309	0.239073	8.03357	8.48847	6.34729	10.6535	13.9763	6.91974
STT3A	357.093	463.599	501.326	247.967	428.48	289.771	223.792	263.758	291.258	396.836	438.502	478.16	484.907	196.335	282.96
STT3B	50.3446	41.273	62.9031	11.8879	1.40695	10.7453	8.4411	14.8449	0.233751	16.9474	52.507	22.2127	36.0793	8.34363	14.7579
LOC150759	7.61093	1.74867	6.81317	-1.8942	1.64973	2.54325	19.9168	3.55954	1.04172	1.73419	-0.503804	7.36344	0.73552	0.637945	6.76984
EDA	-1.073	4.07139	7.47109	8.99737	2.60319	0.464504	0.0674811	4.51237	-0.453862	-0.553638	4.92839	3.03102	2.40038	2.40626	0.0320451
MEA1	139.185	162.144	141.334	124.133	205.065	215.105	233.495	238.552	107.627	150.742	162.687	123.571	105.537	252.977	301.715
FLJ46481	1.35501	3.9339	-0.984761	0.215353	13.1723	5.31653	28.0076	3.07224	6.68712	-2.23665	4.77602	18.8617	-3.54271	-0.832832	4.94357
EED	26.6548	19.2278	17.5947	8.52323	3.99844	18.2316	3.94252	26.9295	17.7861	21.7042	41.9396	28.7293	24.3936	26.4915	22.1786
DARS2	51.831	57.5992	44.5061	64.6333	65.9832	33.8145	90.0529	45.3409	41.631	52.8391	50.9426	65.7623	47.3643	46.852	32.7021
BEAN	0.49618	-3.64845	-2.20947	0.587222	-0.377117	-5.55996	-4.37952	3.3229	-1.06115	-7e-05	3.60142	-2.30622	6.25044	2.86227	-0.566097
ACVR1B	151.377	170.875	152.635	156.004	160.574	131.642	99.2015	60.3745	214.352	120.014	113.925	143.487	127.659	68.2981	48.8297
GGTL3	8.8755	7.40242	8.89304	12.2501	8.08627	22.3307	8.70721	9.5657	26.093	6.72235	5.23643	7.78364	0.490302	-0.152895	7.41857
EFS	19.9235	64.1383	29.4541	14.4013	52.5014	79.3854	45.8433	13.4498	31.2736	16.2203	46.3255	23.7539	30.4427	37.1806	63.6065
ACVR1C	4.25038	-5.04097	-3.4518	-2.5186	-3.91773	0.579334	-0.0312965	5.85719	10.2161	1.38136	4.92465	0.259648	-6.29183	6.48341	2.6922
LOC390483	3.45154	3.65445	-6.02859	5.8676	7.1774	7.60766	8.02274	38.4593	10.5782	6.99768	10.7424	4.10329	7.70343	14.747	14.0168
MDH1B	421.483	100.41	289.189	313.454	325.129	7.83836	267.48	202.714	235.192	292.281	64.6717	307.521	227.861	342.542	48.373
EGF	2.0569	5.48892	3.93252	-0.0379054	3.48197	-3.45229	4.35908	14.1156	4.03188	3.33467	4.77877	4.62745	4.29052	0.218654	5.19078
LOC150763	10.4356	4.67713	9.93775	-0.288435	9.50072	4.61668	18.7013	-1.64447	9.43182	4.16698	5.61852	1.8538	7.00185	0.0687881	3.72497
ACVR2B	4.09191	4.25894	-6.80937	11.6158	-7.83741	0.250581	10.6891	-5.11295	-0.125968	-3.98487	-5.72646	0.568866	-2.97334	-3.59615	-0.844618
ACVR2A	44.6713	96.7631	72.4001	46.3907	63.0012	65.519	56.6724	90.5208	70.8435	92.1007	99.7375	88.616	91.5565	61.3623	75.7136
PHACS	31.5965	23.3762	34.2135	47.1091	107.336	46.5593	65.0726	74.6809	57.0012	41.6245	25.2373	25.3477	46.0768	56.2625	42.4952
LOC644908	-6.99234	6.68802	8.86163	0.468426	-1.25969	-7.25071	13.8263	-3.86943	-6.1411	0.571537	-5.09874	1.85569	-2.14194	-5.02667	2.8985
EHF	361.143	273.118	282.796	161.903	159.804	115.97	1.13601	183.333	72.2386	80.7156	353.949	144.953	206.236	58.8132	37.9987
RPL30	4164.01	6677.01	5394.13	2753.98	4041.04	4026.5	2328.68	5328.05	2051.42	2863.08	7052.17	2573.89	4185.01	6132.53	5080.53
RPL32	2285.4	2607.52	2446.24	2393.41	2411.18	3070.98	2745.2	2881.73	2204.98	1682.68	3340.43	1657.6	2314.96	3030.17	3212.23
TMEM200B	-9.79483	-0.961242	-9.27571	5.33151	-1.38176	1.35807	1.98535	1.05887	-9.8127	-6.13032	-14.0401	-2.5006	-5.71045	-2.69255	-8.59441
TMEM200A	28.4065	16.9938	22.8146	64.5326	30.5465	0.366727	65.3646	70.9468	58.6062	27.2127	156.626	173.35	133.65	9.13767	85.1651
FLJ12949	65.9832	79.7472	98.0286	94.5254	87.7159	159.804	52.7193	50.4742	117.553	63.3183	91.5037	74.0621	69.4653	54.5012	81.9692
RPL31	1688.2	2885.7	1961.96	1427.96	1795.24	1528.63	877.37	1974.8	691.681	1178.39	2690.34	1012.13	1892.75	1783.57	2302.19
RPL34	239.199	327.724	242.224	192.77	220.588	182.539	192.541	423.326	203.377	259.36	462.145	271.017	276.452	499.631	406.029
ABCA12	17.0737	5.12261	1.51511	2.11404	-3.82552	-2.06752	2.41873	-1.69411	-1.25038	2.81483	-1.30039	16.2004	-0.0295985	4.62481	-1.45161
ABCA13	2716.38	1513.5	2224.21	2338.43	2405.67	330.735	664.597	1262.99	3505.18	2819.65	946.18	4851.68	1951.32	1151.89	446.805
GPR174	-0.789114	2.81669	-1.82159	-7.05228	-1.97221	-4.34252	0.241988	1.71849	-0.840648	-1.67201	-1.29484	-0.286675	-0.389053	3.74364	4.29356
GPR173	1.37006	-4.83121	0.908976	7.98867	-4.62243	2.24879	-0.806931	3.76072	2.71877	2.64175	1.66802	-1.33542	6.33913	0.84756	1.93016
GPR176	-4.66133	3.56533	4.25823	8.57281	7.48286	0.736973	2.7687	2.61367	-1.24083	-1.42757	2.77234	2.04607	2.24734	-1.38729	1.94063
GPR175	55.1125	85.423	70.701	77.8953	113.64	113.733	162.923	83.3281	120.927	90.2289	68.4379	50.8261	55.5672	95.2411	114.998
GPR171	-6.81992	11.0737	-2.09415	-2.22516	-0.44038	1.63784	-0.825123	-3.49826	-4.62825	-4.21962	-5.38307	0.241489	-0.0682632	2.26964	-3.42842
RPL36	1095.31	2006.51	1559.71	979.859	1306.86	1967.32	1391.12	1063.1	606.467	739.497	1631.89	664.271	985.958	1442.1	1920.78
RPL35	3414.53	5731.44	4368.86	4689.93	4660.62	7327.85	7388.1	6957.1	4625.99	4962.14	5126.28	3414.53	4539.46	6894.09	9642.88
ADNP2	130.731	153.755	137.523	89.3277	97.7936	132.699	147.51	137.634	101.334	144.355	185.946	138.858	162.318	127.292	186.205
RPL38	12141.5	13617.4	11128.1	8581.02	9327.9	11367.6	8897.09	12239.4	8339.89	10274.5	14131	10032.5	11339.6	15824.4	12709.4
RPL37	21.492	52.1418	43.9854	43.2423	23.9889	45.6548	12.3552	3.54377	22.6772	20.6828	37.5572	17.3391	22.7277	29.0085	16.0675
ANKS1A	487.209	316.266	416.81	556.735	545.856	315.501	255.133	310.733	466.888	476.508	345.82	665.51	463.922	241.879	165.313
RPL39	6534.55	9493.52	7579.6	6297.78	6557.06	5080.53	6297.78	12311.2	6587.69	7949.88	13654.4	7532.83	9324.1	11250.8	11250.8
GPR177	425.937	469.041	508.47	327.851	397.722	268.644	147.522	212.294	271.012	343.002	227.135	410.507	300.989	203.435	117.033
CSRP2BP	36.886	43.1297	40.0015	31.3015	42.6878	48.232	37.3624	41.4505	38.2652	45.033	43.4321	40.0161	49.4473	59.5235	35.8006
GPR179	-0.050146	1.73656	2.72071	-1.78251	-5.94552	-4.30524	1.34645	4.23402	-0.944589	2.37155	-2.22638	3.54706	0.629488	2.97915	4.36473
ANKS1B	7.07826	4.52187	1.79846	-1.79541	3.30618	3.10576	3.41509	-1.04746	-4.60769	-2.76389	-0.485511	-1.28584	0.425902	-0.486241	1.07016
LOC149837	8.22862	4.21272	-7.07724	3.07129	20.6276	5.83113	8.01092	10.8237	7.18813	10.0505	3.47501	5.49756	12.2831	-2.61063	8.48274
MECR	7.30284	4.69667	17.1695	1.33138	16.1316	21.8377	5.88632	8.43828	12.1819	12.5308	6.20498	7.34738	15.9391	10.2988	15.0666
RPL21	861.724	1638.59	1350.23	590.375	931.821	642.446	418.761	1783.57	502.588	722.503	2463.47	825.61	1611.33	1905.91	1901.51
RPL23	427.23	792.256	436.82	246.731	415.644	609.678	604.619	1331.29	652.417	796.127	1545.11	816.826	1336.43	1978.82	1555.72
RPL22	1556.92	2585.37	1895.8	1073.06	1181.72	1245.7	617.935	1770.46	1231.41	1270.26	2531.28	1231.41	1375.72	1899.03	1379.5
MED8	34.6391	34.7735	39.4276	15.8631	30.9996	49.3247	23.8498	32.8727	23.5789	33.4002	37.5919	32.1341	32.2118	43.2448	75.6253
MED9	23.5752	23.3843	25.7557	-1.17243	27.8986	43.0344	38.0959	10.0645	34.3499	24.4018	23.6611	25.1583	20.4617	34.8128	37.6698
AARSD1	131.462	135.198	140.515	256.894	284.235	271.224	224.094	179.797	220.647	167.454	129.606	99.7733	98.8307	123.66	213.724
MED4	83.2465	185.291	154.899	174.865	120.914	139.647	166.35	277.856	205.065	175.04	307.612	202.169	344.618	282.446	289.622
DKK1	7.87113	4.1953	9.90169	7.92705	3.5801	13.1813	29.6895	18.427	22.4202	26.7141	36.325	13.6326	12.3379	13.8455	22.4418
MED6	947.864	740.594	589.139	665.51	540.086	723.351	1398.07	957.35	689.603	1489.07	897.571	963.581	893.314	1180.92	940.21
DKK2	-1.73073	3.08875	1.16601	-0.095953	3.81488	2.01602	6.20144	27.0153	5.24237	12.658	11.8761	3.87743	6.16003	11.3631	15.9463
DKK3	32.6598	349.341	273.371	67.4007	108.469	352.535	390.261	141.987	62.2412	104.081	204.597	35.3716	226.684	97.6336	218.862
LOC341346	2.25816	-1.85685	2.93044	1.32137	2.9951	-1.22356	5.89221	8.25552	6.79893	10.6535	9.55718	10.4324	3.72994	9.5566	4.27745
DKK4	-6.38214	4.6415	1.77099	1.784	-0.0542554	8.66102	1.02147	4.11229	3.4786	0.479552	2.68806	4.22884	0.23389	5.17511	10.3374
GPR162	1213.84	637.315	668.464	1164.25	831.436	55.0848	1036.59	906.452	2205.6	1397.86	403.345	1880.65	1479.35	1512.04	381.795
ABCA10	2.99584	9.34291	0.876008	6.58163	4.79696	10.1354	6.14428	2.84266	14.9072	19.2307	2.74228	-0.879417	6.15354	12.3978	5.15877
ABCA11	10.3506	14.4178	9.651	5.66529	0.634659	15.8633	2.88378	0.227147	-1.41019	2.89264	1.40428	2.74606	3.91491	0.209431	-0.531914
GPR161	-4.70896	5.04417	2.96619	-1.83511	28.1616	10.3539	-3.5146	-2.42486	-2.93908	-0.742468	-2.99008	2.90978	0.265309	3.57823	-3.04518
GPR160	145.147	62.468	66.8074	39.8447	53.4755	26.9466	71.4253	140.499	42.8618	89.4235	73.1984	94.5018	84.7396	155.189	56.344
RPL24	4923.85	7423.19	5940.16	3552.03	4485.37	5126.28	2392.19	7184.48	3919.71	5196.76	9642.88	5208.03	7052.17	6919.85	6353.88
RPL27	5297.96	7495.52	5832.57	4458.95	5525.49	5208.03	5832.57	7495.52	4164.01	6172.51	9159.03	3997.55	6727.63	8475.87	7579.6
RPL26	1450.28	2347.49	1508.77	535.592	1165.09	887.755	410.242	1338.73	495.186	701.134	2801.39	747.715	1558.61	2053.63	2157.65
RPL29	22.5005	31.6415	16.9843	42.4434	23.6342	27.9346	5.66553	150.605	7.88685	28.4623	74.5515	16.85	31.7844	30.0762	69.7229
HTATIP	26.8614	28.1872	20.7917	5.70007	32.1229	32.5914	32.8253	9.80829	23.6472	28.7906	13.0535	22.2273	12.6275	15.1401	7.83737
RPL28	45.317	75.1875	34.9956	45.745	19.0562	99.9541	78.9837	70.3736	30.5465	50.6604	113.747	28.3109	30.3292	55.7922	47.5278
GPLD1	-2.06935	-1.31166	7.08634	-0.099659	-5.0536	-4.63167	-4.46163	2.32957	-2.97729	-2.14709	-0.05725	-3.37682	4.32878	-4.03117	-1.74612
LOC644929	-0.0419551	0.913702	6.80149	4.92626	11.8901	0.926332	9.53904	0.734998	-1.50076	4.20169	9.44775	2.90436	-1.65944	2.78977	18.2902
MEG3	-4.80141	11.8797	22.2603	3.31601	11.2385	70.725	76.8396	3.53132	0.23279	-4.02831	6.69156	-0.835382	10.1725	2.80635	7.37577
LOC644921	-4.63037	1.03093	-5.74245	2.87793	-4.69146	3.90418	11.602	3.49156	3.52256	-2.84028	0.555061	0.25553	2.76644	2.71693	6.34256
LOC644922	5.27161	13.4783	8.86484	55.7699	21.3995	11.3849	47.2878	55.7802	1.98571	-2.41614	2.24158	4.38738	-2.69387	4.62156	5.28913
VPS26A	670.763	1150.98	886.64	619.66	703.302	948.699	937.416	855.483	576.777	789.597	955.095	778.576	894.698	852.371	868.579
VPS26B	142.891	99.7395	127.779	172.114	169.236	130.979	131.462	178.783	140.3	122.01	103.606	108.46	102.258	145.427	182.454
MEFV	0.194226	2.00324	0.344792	1.78575	16.0231	-6.80619	9.20905	-2.7739	-6.06584	-2.72969	2.52384	-2.5179	-3.91312	-3.33232	0.125946
LOC644925	8.75903	2.14646	2.91523	15.5049	5.47216	9.12397	9.53865	31.1219	11.8375	10.5384	7.5923	1.42642	11.4283	8.46455	25.2443
LOC341356	0.47034	-1.85811	3.45206	1.3215	-4.86812	0.581279	-3.33785	-3.867	-0.262269	0.731144	-0.341927	5.88242	-1.88118	-3.54632	2.90573
LOC644923	-1.38606	2.0614	-9.08573	-5.36298	-1.76778	0.58695	-2.12551	-3.43817	-4.21014	-4.87923	-2.52759	-2.80234	-2.86017	-2.51222	-0.0456027
LOC644919	12.5831	19.4331	16.9639	18.5589	33.4339	33.7764	11.5301	38.7419	29.8666	29.3009	35.3911	33.8145	62.0734	15.2344	26.3201
RPL41	11867.4	10895	10302.8	10008.6	11848.7	11844.8	12318.3	13051.2	7774.65	10905.2	12320.5	10017	11860.5	13073.6	13036.3
LOC644916	-2.33725	2.22568	3.93005	5.66383	21.0265	-1.14697	-2.52196	-0.510204	0.914847	-2.4066	1.64002	3.36171	-0.628649	4.66946	2.53702
LOC644917	-4.63179	-2.00511	-1.86526	1.14156	14.6722	-3.92401	2.00248	3.65018	7.45671	6.76562	7.82142	0.592597	1.05263	-2.40851	5.19509
SLC16A12	1265.37	1191.16	1503.27	2607.67	2160.28	1995.41	3663.34	963.376	3868.6	1245.69	870.822	989.911	2109.35	910.511	1762.09
SLC16A11	8.4423	8.25035	7.60189	-1.85846	39.3589	-2.75626	2.37307	4.11497	6.92269	6.37336	-1.18362	4.23707	0.919815	1.48088	-0.750808
SLC16A10	22.1227	26.7694	33.8145	6.24735	9.1454	23.0276	63.824	14.4145	33.7717	26.7269	43.0385	23.2822	26.1958	27.9313	45.2463
RPL3L	-2.05137	-3.49271	2.23441	-10.4458	-0.0251503	0.826567	-11.4675	-2.78145	-2.51242	4.9804	5.52205	4.47888	3.53753	0.742642	-1.86043
SLC16A14	19.9676	21.1078	26.0164	18.559	0.741081	3.13945	13.7821	17.3162	16.9396	24.3995	11.7314	17.3761	14.8731	10.8681	13.2209
LOC644912	-5.38185	-0.842776	2.90918	15.5059	-1.76758	-5.021	0.351819	2.06499	-0.446825	-4.64893	-2.76688	-6.14729	-0.973236	-5.34228	-3.90884
SLC16A13	5.32912	2.15348	10.2174	6.24688	-2.75859	-4.48885	2.37169	-1.38095	6.56814	-1.90924	-1.27099	4.59752	0.930827	2.96276	-4.68501
GPR180	112.896	65.5019	80.4925	115.995	137.874	40.6051	147.963	81.4748	83.2363	76.706	62.9264	119.268	69.5817	67.9768	67.8713
GPR182	-3.46755	1.73669	11.1161	-7.75789	-10.0251	-0.241304	7.84561	-6.13781	2.29522	-8.73626	-3.66868	-4.23033	-2.95858	-3.11384	-6.95119
dJ222E13.2	11.2946	13.4981	15.0114	10.0544	14.3168	3.08518	2.69351	13.9829	5.12769	19.8897	28.3994	6.40044	18.8771	11.9027	2.25605
LOC389316	-3.87945	1.55981	-3.49013	-4.63324	7.82051	4.95804	-2.33219	25.7462	-0.52619	6.79347	11.8325	0.895547	9.82072	3.49588	13.4845
SPEF2	19.2365	11.8677	28.1679	40.5611	20.2853	4.46465	10.6925	-1.46331	5.95813	12.0142	4.67154	21.5685	19.1877	9.60608	-0.965823
MEI1	1.81597	2.7397	2.96612	11.6669	11.7173	2.05094	-0.582591	8.72006	4.35424	5.35418	5.09468	4.07697	2.71051	4.27587	9.46773
ELL	34.1345	64.2586	37.7139	65.2565	9.15819	75.8618	27.3897	34.6866	65.4991	59.293	50.9519	40.6077	56.822	51.6818	46.1733
SPEF1	162.544	53.0668	94.5254	130.58	162.524	9.92146	248.668	85.9681	156.626	76.5044	21.3714	90.3684	72.9942	164.808	19.6106
ELN	6.37148	10.5213	15.5713	9.50954	1.05659	10.0164	-1.34877	5.78906	3.73866	2.05256	4.13901	0.349197	12.1694	6.23072	7.20166
LOC644943	-0.0418147	2.69785	-1.06469	-7.70479	0.60366	-0.363541	-3.54133	4.105	1.14741	-2.62108	1.03519	2.46164	-1.77564	0.814523	3.47159
LOC644944	-2.33521	-5.07767	1.99505	2.87325	-8.40625	-7.26252	1.73419	-3.44977	-1.27987	-1.21945	-7.63022	-6.13728	-2.61104	-5.38971	-3.40896
LOC644948	-0.0421239	3.33389	-1.06866	28.4014	-4.70165	4.27418	5.16313	-3.44267	-0.937029	0.147411	-1.1674	-3.33176	-8.72107	-3.74692	-3.84504
LOC644946	1.15231	-2.73891	1.63366	15.5004	0.611885	-1.14968	9.53447	2.93336	1.0348	3.50015	1.56203	-7.11591	-0.503356	4.97319	2.924
GPR132	-1.42749	14.4087	7.72394	-7.72487	13.7504	3.72485	4.92226	13.2926	6.34443	1.24738	10.6514	12.1511	8.36445	3.64717	13.4008
LOC644950	-7.77039	-5.3119	-4.23326	0.464232	4.38796	-1.14997	-0.522793	-1.41281	-1.66938	-2.85042	-1.28177	-3.84048	-4.29162	0.155883	1.00295
LOC644951	8.13302	5.91127	-5.73645	5.75613	12.051	-1.14908	1.38718	8.73914	8.75988	11.2859	15.2387	3.49877	10.4413	13.6784	9.44243
GPR137	712.961	748.538	843.004	1329.31	997.566	845.221	872.108	901.091	1178.39	1174.01	815.55	964.021	1019.97	967.274	987.6
GPR139	-4.65795	-0.61561	7.71892	8.66795	6.0323	9.14508	5.88581	8.75278	-0.0370188	-0.840213	-3.94083	-3.66419	-0.529151	0.60811	1.42774
GPR133	-3.08303	0.472805	1.43396	5.90483	3.55494	-4.24732	-2.12313	1.22907	2.53571	-2.09691	-1.68647	4.62676	2.96647	2.75785	4.23759
EMD	558.486	631.971	553.434	640.551	695.699	737.981	917.464	572.727	743.198	794.576	614.696	592.691	652.011	1082.28	1016.28
GPR135	9.05541	-0.609538	7.8682	7.16164	6.20129	-7.17703	0.172927	0.396659	-1.28855	2.61946	2.36049	1.64919	0.641885	0.643253	0.586302
ZC3H10	67.2382	84.7501	59.0651	1.4437	80.4722	75.2903	92.6759	76.706	43.9308	60.0318	58.2689	45.8753	57.846	67.7034	51.0627
EN2	4.6449	-1.15726	4.9321	-5.30643	4.37695	0.602407	4.63183	-6.14667	-6.16334	10.4432	-5.05078	-2.05235	-9.37367	-10.4497	1.86699
EN1	5.75506	-5.85299	-0.663045	14.2988	4.37602	-6.81781	-4.69008	4.95018	-3.41342	-2.0879	1.00537	-0.255414	-1.87796	3.37705	0.361123
LOC644931	50.656	37.4985	126.367	36.2077	178.431	96.0415	39.4855	1.43277	29.1182	-1.87796	5.31358	19.2916	58.0178	-0.965503	-0.979562
FLJ34306	-7.11807	-0.65368	-0.970765	2.02584	7.85042	4.93473	-8.26382	0.258768	1.94905	1.44565	2.79313	-3.53466	-1.66873	2.97226	-1.41146
LOC644934	544.297	488.757	846.635	460.912	814.228	1422.09	571.073	832.237	208.712	237.799	815.104	399.131	274.76	725.745	1057.53
LOC644935	105.079	208.478	132.034	191.683	149.852	151.929	160.479	117.537	181.375	163.864	144.331	141.517	140.781	137.634	148.794
AFTPH	89.164	84.8765	84.6481	123.717	124.784	83.6336	41.0898	65.8495	69.684	92.0324	70.4188	100.37	67.4296	68.9973	64.5036
GPR120	-5.06032	3.45051	-4.21014	1.78309	3.55189	3.73081	6.38407	1.38301	-0.9817	2.76536	-0.0122302	-1.67823	1.13524	-1.23173	-5.31962
GPR126	8.01396	37.2993	19.7126	-2.14415	6.03421	61.6863	19.7229	-4.22709	-4.66095	-3.85979	18.4613	2.72922	-4.59667	0.219696	-2.04232
LOC389333	0.467194	-0.0387685	-2.24327	-2.32853	2.92842	-3.93357	1.3401	-5.44394	-5.39691	-6.39813	-4.59988	-2.08849	-4.67993	0.917161	-8.76507
GPR128	4.00323	1.97048	-1.20623	3.22169	1.72553	0.750992	-2.68835	7.00099	1.20442	4.66582	3.95236	0.435059	3.60708	4.96534	0.702611
GPR123	4.47659	2.924	-2.10708	-2.13576	-10.8276	2.92525	5.13786	10.0412	-3.52539	-3.51274	-5.33425	-4.67897	-2.03382	-2.0343	1.85165
GPR125	7.54952	8.00121	11.7436	-1.28651	35.009	15.7569	12.7765	12.9182	38.0238	5.10192	2.3324	7.54403	11.9329	9.83712	7.88253
LOC392979	-0.657891	-3.9504	-0.976311	-0.639708	2.91057	0.998984	-2.69511	2.15748	7.48982	-0.629525	3.16096	2.23493	-1.27621	-0.0490016	6.01869
ENG	10.6657	36.825	69.8257	93.8585	53.1024	114.379	48.373	8.36812	17.8546	2.25816	18.3773	24.6703	26.3146	20.7411	19.598
PCYOX1	131.433	117.22	127.433	67.0746	98.6924	263.134	280.883	84.6269	168.979	132.875	125.651	119.264	185.155	95.4469	99.7694
GPR124	1.73513	1.72676	15.1482	-4.69175	-0.44347	43.8895	15.1359	0.746924	-2.73166	-5.11231	-4.67867	-1.65219	-2.8195	-1.05938	1.23478
RPL10	-2.17693	-3.61951	-2.71566	1.75282	2.62436	1.53564	-2.18938	1.39549	2.36549	-4.06794	0.0586525	0.26346	-3.98404	-2.99575	-2.60145
FLJ46300	0.36849	7.20266	0.557848	-3.90354	-9.91468	-3.91102	-6.69846	8.56999	13.0067	2.03751	5.8875	6.4751	2.04023	8.20662	9.14759
RPL12	3701.7	6491.74	5247.14	2885.16	3638.17	4048.74	1932.1	4179.23	1649.97	2344.96	5695.19	1988.63	3264.34	4967.03	4526.97
RPL11	6772.02	8434.23	7271.86	10012	9934.17	8776.63	9566.38	11850.6	9018.81	8640.15	10589.7	7796.88	9555.71	10766.9	12138
LOC642302	-0.0384132	0.739101	4.23662	11.1903	2.37077	-3.94536	-2.60395	12.8016	1.63389	13.4001	3.73642	-0.0233815	1.42511	3.34979	4.61167
LOC644963	-0.838235	-0.343711	0.18883	4.92877	-1.78229	-6.19044	4.18828	5.9222	-0.435473	1.01316	4.67527	-2.07946	-0.946718	4.60124	0.613441
LOC644964	-0.837835	-1.23535	-6.16749	2.87201	-1.77332	-7.3746	1.38706	3.9355	0.0732503	5.12842	6.01453	1.24719	-2.8419	2.76097	0.21309
LOC644968	1.13831	3.91358	-0.529487	4.92971	-8.57734	9.12128	3.90929	0.907378	1.34195	4.93638	4.67132	10.4638	2.91486	6.23667	12.7965
GPR152	-3.48252	1.01867	2.26212	-2.12635	2.27079	0.65238	-0.00896681	1.35558	-0.466554	-4.30753	-1.91599	-7.11677	-2.12313	-3.85317	-2.04456
GPR151	4.95916	-4.321	-2.24258	0.330531	-5.93904	5.19031	3.45154	-3.426	-4.86891	-3.92627	-4.68083	-1.93222	-6.5366	-0.232327	-7.87253
GPR153	3.32898	5.49258	8.46875	2.77093	-1.39698	6.38119	-3.06634	6.04111	6.39628	4.60184	6.34693	4.19839	2.93607	16.9978	1.24408
LOC644973	2.6852	-0.847451	-1.92921	5.47929	21.495	2.78137	-0.522941	19.9921	15.8391	14.766	9.26468	11.7594	10.5328	13.4987	28.3087
GPR150	-5.07892	-2.10218	-3.04284	8.6692	3.55004	-0.235628	3.44946	4.47476	0.634659	2.72185	-2.82549	-2.85796	-0.984032	1.01077	24.6822
RPL14	112.417	242.459	121.121	55.8842	81.9869	109.435	335.57	197.304	241.771	96.076	394.112	49.8159	113.419	539.686	637.421
LOC389300	7.17204	7.00001	4.59592	14.9309	10.5355	-4.2406	-4.32507	37.1977	21.3965	24.2991	5.90929	23.9061	14.1095	28.403	17.7385
RPL13	67.6937	135.527	78.8724	106.365	49.4586	152.542	199.164	215.887	67.9981	71.7789	179.414	63.3963	84.7154	216.999	204.587
RPL15	3019.28	4245.58	4133.1	3197.45	2900.59	3219.66	1484.45	3276.95	2199.43	2541.64	4026.5	2341.38	2937.01	2905.73	2581.9
GPR156	11.6831	13.2831	8.22694	0.255658	-3.583	6.38194	8.02616	4.29052	-5.03563	-4.27684	-0.477693	6.91843	0.620143	-5.70875	-3.56666
RPL18	9493.52	10939.1	8726.34	8229.16	8955.74	13774.1	11599	9493.52	8726.34	10428.7	10725.6	7949.88	8826.41	11118.8	11890
RPL17	3590.83	4885.68	3674.74	2069.09	3203.87	3206.03	2069.96	3662.05	1725.67	2490.64	4964.44	1998.87	3740.5	4283.84	4301.2
GPR155	-3.18648	6.66977	-0.81027	-4.12714	11.4816	-7.89217	4.36876	-0.0864385	-1.10958	-1.08886	1.98834	-2.03327	-2.38371	-1.98182	-2.51288
FLJ46309	1381.36	814.355	1094.93	1859.66	1689.17	1391.51	1708.66	1125.12	1906.6	1257.77	483.712	1681.61	993.696	648.814	687.533
GPR158	-3.33672	3.54733	-3.0568	29.5906	2.27255	2.926	-0.00947671	-2.11775	-6.69252	-7.75057	3.44474	0.649967	0.737993	-3.32826	-4.67669
GPR157	10.3327	0.551272	0.467194	2.77077	0.746924	-0.236498	-3.47286	-4.22188	-2.41308	0.372403	-4.20047	-4.57907	0.918633	-2.60492	6.01673
RPL19	7579.6	10091.6	9642.88	6010.07	6534.55	9199.79	3824.98	6114.89	3393.63	4514.17	8229.16	5138.11	5419.59	7532.83	7732.04
CUTL1	142.45	132.97	113.516	183.005	67.9993	212.636	69.9413	61.409	134.668	107.371	141.087	139.647	105.555	21.7428	42.3944
F10	3.93275	-4.25619	11.6052	-2.73326	2.00283	2.98903	-1.92393	0.905382	-0.836354	-0.496382	-3.41738	0.648447	1.43457	-6.21182	11.0832
F12	65.2669	112.888	59.293	35.9092	21.7543	201.673	234.006	44.6895	110.881	88.3739	148.074	81.8499	100.705	26.114	271.189
F11	3.16041	-0.334521	1.41569	5.94391	4.75888	5.86229	-2.29271	1.11041	0.193905	-1.58607	2.79486	-2.24432	-0.376379	-1.18756	-1.64781
GRRP1	0.387987	9.71884	28.1914	0.609813	-2.7884	63.135	31.3116	-1.72239	-1.20794	-0.644037	6.3574	-0.898595	5.7146	0.594856	0.605546
LOC644954	6.77516	-9.44383	1.0177	2.87311	5.473	3.91901	4.24671	-3.95105	3.90464	-3.58342	-5.3833	-0.632158	-5.70901	-7.23587	-2.81379
NMNAT3	26.5472	41.7153	26.8946	7.36745	29.9506	58.7013	53.2107	35.0769	28.9205	30.2435	52.2395	22.5553	32.5958	35.6102	68.2417
LOC644952	-5.37927	3.91309	-2.84419	-6.80489	14.6728	-1.14889	-3.54103	32.7115	13.5916	20.9042	14.6513	9.16698	14.025	31.7521	21.3757
LOC644953	-2.75744	-9.41993	-3.47044	-6.80352	-1.26063	-2.04862	-0.523203	-9.89324	-6.15014	-4.64133	-7.74972	-4.28711	-4.41331	-3.34111	-3.67129
NMNAT2	7.8154	2.11849	0.133642	-0.0973363	1.07385	3.29731	3.45671	0.0633865	3.2211	-1.33306	0.887979	-0.567698	2.45842	-0.014068	-4.36874
LOC644958	12.3731	2.06124	-1.06637	0.466204	2.7258	9.12346	1.73882	1.36392	2.91595	1.03002	3.4912	3.91309	-2.86347	-3.54271	-2.13544
LOC644957	1.1406	-7.74649	3.92366	0.467194	0.61043	-7.61953	2.61445	13.1979	4.37549	8.49203	1.9968	3.8088	-0.364183	-0.835029	0.331403
GPR141	2.29577	-0.177497	2.47063	13.4156	-4.55258	4.04901	-4.16629	2.51794	3.79385	4.77693	0.72971	6.04696	-1.61968	3.06258	6.69771
GPR143	8.74718	12.1446	12.8366	29.5935	15.1472	36.083	58.1623	9.55562	-0.544083	0.552076	3.65259	8.46163	-1.65044	4.92298	7.45566
GPR142	2.917	-3.51112	1.43781	2.77052	-3.0568	-3.09802	0.650611	5.28718	-0.0439023	-0.234054	1.7413	1.03924	0.814658	-3.53453	1.94125
LOC644961	-1.38571	0.931345	-4.40548	7.59364	0.612935	-1.14928	-3.5424	-4.09666	-3.83756	-4.78774	0.592814	-1.15441	-2.14061	-6.70664	-2.61627
NMNAT1	17.1447	11.8673	12.6512	-4.26968	-9.08851	6.89551	8.46333	-5.45914	2.79209	10.8268	4.66808	1.35119	9.83431	1.38136	2.24714
LOC644962	-0.597326	-5.60345	3.16717	0.10688	9.11733	-5.89673	-4.231	-0.712667	-1.94305	-1.10202	1.40678	-0.77376	3.53024	-2.26741	-7.35758
MSRB2	534.491	500.44	484.907	626.113	430.076	453.333	640.154	629.409	514.046	584.403	541.315	622.572	513.442	761.735	712.388
GPR149	0.827171	6.51258	-1.50881	-3.40628	13.2798	-0.892725	4.34944	1.47706	-4.61115	-4.18945	4.06326	-0.174001	-4.81997	3.05483	-0.302828
MSRB3	-0.681447	14.1691	14.7536	2.84424	8.1232	9.14136	0.0898743	7.33482	0.763085	2.21403	1.42449	3.7866	5.08394	4.07606	0.490234
GPR148	-2.06456	-4.87449	-0.236351	-1.87004	0.743098	2.92622	-2.1204	3.46099	-4.66178	-4.40933	2.0189	-3.49388	2.88869	3.72357	-5.33786
ANKS4B	8.85413	-3.74619	-2.83626	-5.03888	-6.13091	-5.42087	-5.8312	-2.74353	-2.60395	-9.08069	0.340984	-1.65526	-4.59936	-5.08624	-1.89399
GPR144	2.92135	7.56894	7.21626	0.329462	-1.36342	3.72409	1.32937	6.37514	7.74114	3.36838	2.07166	-1.24083	2.7337	-3.05028	1.46911
GPR146	-0.445877	3.45597	7.72185	5.9105	2.27565	5.89921	6.66227	12.8183	7.22058	1.76595	1.02251	2.86534	4.22775	4.01718	2.14982
COL16A1	44.6895	61.409	75.2648	155.151	92.5008	82.4693	214.077	59.0651	90.3602	40.227	31.1127	41.9102	78.8472	35.66	56.0162
EPO	5.29233	-7.65195	-2.69944	-8.70447	1.98157	6.02877	-0.343293	1.01524	-1.36321	0.15058	-2.52196	-5.73024	-2.53358	-3.88003	1.45636
LOC400236	-0.0205276	4.92277	4.58029	32.1496	8.34539	1.02722	7.19782	7.82857	2.07309	5.19404	5.17475	8.96284	4.48637	4.20929	1.04687
LOC644986	324.51	54.201	204.549	179.823	224.073	-2.84666	1.38738	121.209	87.6075	180.345	49.9858	140.515	151.599	117.172	5.74317
LOC642325	0.57353	4.42446	4.30937	5.595	6.47487	5.4537	3.125	9.99782	0.978916	-2.55536	8.80405	2.46442	3.02147	2.25324	5.69417
EPX	9.3504	8.83973	3.49035	-0.504764	-6.85732	4.75874	9.93015	-6.02599	-4.65689	-15.0951	-4.79039	-5.46996	-6.18964	-6.5008	-12.285
LOC644989	6.77192	-0.849341	-3.47183	4.7583	2.72523	-5.01741	-1.3641	5.93129	4.67773	4.62233	10.4229	8.34952	3.52562	10.8237	0.199002
LOC644994	2.37678	4.64312	-0.619615	36.8737	2.72819	5.9287	-2.12394	1.77964	4.38837	-0.26865	2.70339	2.79356	2.36534	4.25126	-0.47864
LOC642333	181.082	167.348	103.949	144.871	116.103	144.069	217.755	78.2271	163.98	77.3491	122.957	109.183	199.712	171.891	152.192
LOC644992	-2.49853	-2.00378	-1.92449	-2.78102	-2.01356	-5.06478	-2.52281	13.1737	3.90559	-0.541778	1.95006	2.69882	2.29603	13.1842	8.76669
LOC644993	-2.75817	-2.74288	-6.16442	-3.94318	10.8426	6.24853	-2.51708	4.21069	6.8982	4.39694	3.3658	5.52045	12.1554	6.64923	2.0028
MEN1	20.6643	18.8719	13.7622	31.2817	16.703	19.3204	14.4284	13.1864	14.0833	16.2412	14.407	16.6522	8.98933	11.0978	7.87996
RNF43	16.9724	25.9063	22.073	2.37731	36.102	42.4782	8.95003	11.0803	34.9796	16.2074	8.47574	16.9587	21.4995	11.3892	8.00784
RNF44	48.2554	75.5549	46.9412	13.6763	42.3702	128.813	65.0894	48.556	49.3923	40.4255	108.46	75.6473	76.5044	14.1226	47.4231
F2R	7381.54	5827.19	7805.99	10284	9336.05	8097.01	9532.19	4974	11308.9	6396.32	4089.31	7133.39	9717.77	4616.41	7783.27
LOC343927	-8.61341	-5.06835	3.73445	-4.68383	2.99658	1.8634	-5.4081	1.32398	-3.55702	-3.66334	-5.12324	3.89707	-3.45303	-6.28693	-1.18483
LOC644976	4.61747	0.584063	-3.13586	3.03618	3.75293	-0.916799	1.91013	8.32733	5.12129	1.32329	11.0495	0.344763	1.76064	5.6806	7.23784
LOC642313	-0.121858	6.86788	-3.53881	9.32335	5.6989	2.00466	6.85389	-0.805156	2.02443	3.60654	1.54186	1.71742	4.15462	4.27705	2.55916
LOC642312	4.28159	6.47358	-4.23871	9.03844	31.1763	0.650256	12.3806	32.1252	29.6847	20.9111	13.8947	11.0999	13.1893	35.1457	12.0677
FLJ10357	18.5887	12.5397	17.6526	78.8414	86.313	46.1627	61.2824	49.2245	6.34535	3.34629	-1.35549	4.92796	-0.635763	5.66415	0.0708244
LOC644974	1.24523	-3.1097	3.49918	5.48096	7.0064	-1.14444	2.70661	-2.51967	4.57966	4.38202	3.81566	2.02667	-1.1374	4.64764	5.88038
LOC644975	1.24313	-0.342811	1.00719	4.92719	5.47615	-0.354151	-6.97786	0.250276	2.93992	6.39802	2.93451	8.73759	7.17666	1.32979	3.33251
LOC642316	2.53781	-2.61523	1.44387	11.1229	15.4842	5.18975	7.2953	5.29604	10.6554	1.38018	7.92338	7.45671	6.56034	8.58864	11.1126
RNF40	100.633	99.6435	87.9743	146.777	136.348	165.981	90.5688	53.2556	101.309	84.7167	72.0488	70.4511	61.8715	58.1452	61.6205
LOC644978	2.68722	4.2223	1.00842	5.47424	4.38655	9.3703	11.3928	2.87279	-0.0590324	3.51484	2.06965	12.1451	0.922714	5.32368	1.44787
RNF41	16.054	13.7284	27.6127	33.088	43.9026	13.6758	24.5251	1.05846	12.3545	21.8254	13.9685	25.7457	17.7703	13.0507	12.3795
LOC644979	109.795	16.9073	15.4532	-0.817932	8.76543	14.5641	1.83558	47.6557	42.9933	16.2584	49.4171	37.1235	15.7853	7.10092	8.84336
MELK	82.8067	36.2756	15.0548	-1.21146	11.6713	103.008	79.4495	61.0754	19.0739	51.8127	221.777	35.6103	44.9637	44.8448	164.985
LOC644981	-12.8381	11.7598	-4.40484	1.14416	14.7495	4.36278	-2.52301	6.03333	-2.94985	-7.19229	-1.58238	-3.92692	-4.61761	-3.47183	-1.77963
LOC644982	-2.76086	-9.46141	-2.00164	-0.928996	2.02793	-2.05014	7.36972	6.81197	4.97821	-2.74585	0.257423	-0.021549	4.57395	4.63267	5.1235
LOC642321	-6.01557	10.4272	5.47473	-8.38512	0.601051	2.726	2.25319	1.38136	0.573454	3.90892	2.2886	-4.62239	-3.53152	-2.70798	1.0096
GAPDHS	-2.133	3.11669	-1.07202	5.17677	1.15746	1.65495	5.33707	1.49071	0.217403	1.71469	0.069236	-0.246334	-0.0621635	-3.36629	0.157662
ERF	41.3433	71.4118	77.4205	58.5959	71.8252	123.766	107.344	18.4866	66.3843	62.9682	29.5684	60.2289	67.5012	80.3787	14.3187
ERH	868.357	729.104	701.134	740.594	796.591	502.43	402.962	994.124	394.469	705.547	962.782	698.713	625.682	1021.7	849.205
ERG	-1.37456	-2.34245	-0.0511737	-0.226424	5.36454	2.41288	0.627002	7.29965	-1.83719	3.40267	2.10284	3.09286	0.913447	1.51339	9.48235
ABHD4	23.3914	27.8216	25.1506	6.04821	17.6663	53.6298	28.0222	16.3457	39.4743	52.3423	29.6955	39.9256	24.4039	39.2743	58.6313
GPR119	15.052	15.4056	11.4142	1.85539	-6.29683	7.19323	12.5499	1.39439	16.9958	4.59428	0.920545	3.17392	5.13842	9.82749	4.97107
ABHD3	158.639	111.882	171.634	50.6386	103.755	72.8644	9.13737	91.6941	32.6306	76.3927	114.5	167.88	97.0411	84.109	60.4232
ABHD2	22.4459	31.9046	16.9426	24.725	7.68992	31.0341	29.4893	-0.878629	7.89441	22.5366	15.2591	13.1514	13.316	10.8247	9.85328
ABHD1	9.15719	0.823285	4.10691	-4.68643	-7.09762	-4.56321	3.35035	-3.06178	1.0096	1.1317	2.04502	-8.78111	-3.09437	0.249279	-9.67976
ABHD8	178.41	133.93	138.023	136.489	90.129	148.995	158.442	196.12	172.697	143.247	156.392	182.476	150.733	232.297	241.605
LOC642345	2.86934	0.645431	7.18381	6.01474	12.5562	-3.92313	-1.15145	17.1436	6.27175	11.1205	16.522	7.92756	8.58785	11.1121	12.3695
ABHD7	7.60084	21.7597	5.76314	-1.57558	-3.88403	5.48485	34.0118	-2.23934	-4.17827	-2.14309	5.15197	-3.9321	5.89921	-3.91232	-3.58689
ABHD6	203.645	76.3867	135.834	151.223	191.768	57.8368	119.604	134.358	120.442	126.835	54.0353	145.898	89.4333	96.6766	36.6464
LOC642348	-0.0368065	0.645217	12.57	5.94639	12.5553	8.22938	15.0215	5.1621	1.43174	8.2586	4.64337	9.83267	4.36961	11.9019	3.52516
LOC642347	-10.7319	2.91861	3.1688	11.1195	-3.09499	-4.20911	-0.53288	9.13575	7.7216	19.0488	10.4282	5.87556	12.5606	5.12056	12.8266
ABHD5	72.2167	62.9226	29.1473	6.04043	16.8511	88.8084	39.5863	42.5657	26.0156	63.208	78.2217	25.391	30.9302	75.1076	86.313
ABHD9	51.7596	20.9902	13.6662	99.3917	66.7861	110.369	56.1117	61.324	36.8946	27.6166	142.998	73.4755	51.0844	77.3289	82.8441
STRA8	-1.89327	-2.32952	-5.82453	11.889	15.0429	-3.83372	0.248612	-2.83361	-0.676474	-1.05651	0.258995	3.89564	-1.37036	-2.11944	-1.90389
LOC642351	-2.72599	-2.53358	6.67373	2.8904	21.7318	2.71728	3.36748	11.7518	6.34303	10.0616	4.66496	-1.89461	5.32503	3.3662	8.57544
GPR110	274.285	112.682	96.9336	135.974	155.838	170.782	85.6147	117.817	99.9768	140.938	105.266	147.046	181.268	171.356	197.149
LOC642350	1.34335	-9.24071	-2.52976	-3.92518	-1.06369	5.1875	-2.60197	-3.90263	-1.20246	8.20861	2.93715	-1.18674	-3.04259	-2.01557	1.24058
LOC642355	1.05004	6.56471	5.47067	-6.40126	0.596841	1.7392	2.25936	-1.27811	-2.33219	-9.62851	-8.76747	-7.71563	-3.48331	-7.24996	2.95319
ESD	526.496	441.796	451.769	296.054	299.105	246.034	105.326	387.461	124.73	180.794	500.631	310.963	408.673	379.641	423.564
LOC642354	2.68471	1.00774	0.92008	8.93496	1.99265	-4.24575	2.76796	4.27332	1.03108	1.4095	5.15493	-0.636219	5.16273	1.42865	-0.222739
GPR116	43.9211	64.0042	46.7545	52.2236	39.7745	178.875	115.182	156.717	100.943	33.3257	44.8743	120.039	38.5754	119.26	35.8906
GPR115	2.9554	-1.3725	-1.41476	4.20056	-8.58933	-3.10513	13.3908	-6.96294	-2.80292	4.68218	-1.76181	-4.61409	-5.63025	-2.61452	1.73669
GPR112	-3.07452	-1.37282	-2.33379	-6.20438	-3.05311	-3.10125	-0.619512	-1.22545	-6.23244	-4.64771	-7.45555	-6.10507	-5.32398	-9.00328	-6.41396
GPR111	-3.5086	2.79263	-2.104	-8.53778	8.75156	-3.46996	1.86106	-6.95777	-7.25129	0.166563	1.44227	-3.09107	-0.233255	-0.934282	-4.6334
GPR114	19.8949	16.5291	16.3286	21.8468	3.90398	23.382	28.2438	16.3362	33.3367	7.934	25.6537	30.4245	31.7666	17.1557	12.1533
GPR113	-0.442375	7.59935	4.26428	1.86148	3.55145	-0.218293	20.4532	9.9134	7.47951	1.36728	5.67244	-4.87539	10.3066	3.5547	0.639099
STRA6	18.1219	38.7789	41.2279	24.8665	8.86082	24.5736	37.878	0.598621	18.5671	35.886	5.83262	15.7513	18.4813	-2.60444	9.81497
LOC255025	8.3534	11.8704	3.49677	8.49968	-6.81385	5.84804	7.92294	-5.7314	-7.28358	-0.827091	-3.84655	-3.87572	-2.14779	-4.64535	1.14209
GPR108	98.2953	137.304	124.05	115.845	84.5003	197.901	119.052	77.4263	155.927	120.159	83.1551	101.181	105.38	64.9703	99.3828
LOC642335	-5.42412	2.24973	-6.41202	-1.46512	8.53469	6.11927	7.3659	6.30541	3.95227	4.15089	5.55103	1.89698	7.8783	4.05793	2.21167
LOC642334	3.10129	-5.1378	5.83869	-2.53133	2.11055	-1.25107	3.3495	-1.83014	1.70189	-0.485452	-4.97309	-0.781851	-1.19848	0.175305	-1.47889
LOC644999	4.28459	1.03877	5.14937	2.87505	-7.24189	2.78222	3.9339	-2.71635	-0.985132	-0.917658	-2.1509	-1.06882	-0.535428	-0.532721	-0.673888
PALB2	31.8628	48.5453	32.8316	69.7494	28.7545	47.9984	24.8764	14.9166	20.8228	54.9103	65.9646	45.0149	20.9874	31.8685	60.4179
LOC642338	1.3336	5.67311	-0.0247243	-3.92417	0.600378	5.8998	-0.528059	13.8228	10.5484	8.24628	16.0483	5.1621	11.2915	7.47436	24.5834
LOC642340	10.5546	0.643573	-4.23827	-3.92401	1.85445	1.73799	1.32696	8.24305	-6.24445	-5.33818	-3.09892	-0.831655	-1.85833	1.9627	-1.22316
FLJ12993	11.4338	17.7379	5.91744	0.628203	1.94192	-3.41719	-0.450544	16.1194	5.17196	7.93246	5.89596	1.85231	12.0547	1.95132	2.03779
LOC642342	65.1718	43.1996	91.148	187.234	155.176	66.4597	85.336	143.247	102.258	120.539	47.401	88.5019	81.1732	130.979	90.3089
LOC642341	1.33313	9.92947	-0.0233815	-8.38369	-6.18297	0.637945	-2.60352	-8.71664	-12.2429	-5.83226	-10.4546	-7.35806	-11.751	-7.88929	-7.86658
LOC642344	4.39544	-0.835029	0.915202	5.12934	1.8597	3.72466	-2.60444	3.07816	1.36214	2.28465	6.14588	8.32932	5.93686	9.27656	2.28988
LOC642343	-4.31789	2.02559	2.94888	-2.95982	-2.10864	-5.13717	0.342945	5.32883	6.47869	1.97483	3.09377	0.814887	4.10116	0.207754	-0.662977
TDRD10	-3.89802	13.4837	3.72397	-1.25877	-0.0657122	1.78435	3.45935	-2.85464	-6.15747	-1.5028	-7.64144	-2.95026	-10.7455	4.20078	-2.72599
GPR107	11.1898	7.60371	7.71665	76.9779	2.24966	-1.43243	-5.38372	6.04646	6.67254	15.1415	9.17753	9.54006	0.61904	6.27063	9.36681
GPR101	10.025	8.24628	-1.41315	-1.93044	7.72746	5.19904	-2.09966	37.9898	14.9248	4.76378	16.8567	7.50097	13.6628	17.3094	29.5824
SPERT	1.03392	-4.57984	-5.02904	4.68907	-6.93832	4.36675	0.167629	3.93823	6.93021	6.25146	8.95447	7.47642	-9.67843	0.57579	-1.14305
GPR103	1.99875	-2.93693	0.597979	51.8462	9.17598	1.64457	-2.0998	18.8845	12.5483	15.602	11.208	10.4459	9.66556	28.2471	11.4002
RNF10	61.6959	69.5755	50.3796	53.9135	55.7947	82.6709	57.5041	28.7885	52.3423	95.9639	29.5762	41.7085	40.3414	43.7895	55.1085
CALCOCO1	68.2643	73.2114	66.9017	44.5175	114.619	77.8588	67.3265	52.6443	96.0552	81.2202	36.8278	86.4091	46.0415	85.3323	67.5696
RNF11	46.1989	34.7104	30.3633	31.5181	32.2563	12.2428	36.7305	36.7596	14.8746	36.0932	41.5987	31.0517	33.5162	41.1095	35.411
RNF12	2.46445	-4.78111	-2.28535	4.91532	2.6574	1.55214	-0.946358	5.8002	1.3257	-3.95415	-0.580646	0.273614	-0.343753	0.686002	-0.50961
SFT2D3	25.3519	44.8888	33.2196	4.58092	9.19476	52.744	31.1293	17.8457	49.5876	41.2709	40.6337	63.8138	34.2448	44.7713	27.5053
RNF13	78.1176	106.429	133.715	79.7288	61.0492	58.5039	23.5515	103.912	41.6494	46.1581	93.9798	73.0221	64.0349	69.3725	74.6145
RNF14	175.004	172.005	166.292	179.628	143.941	110.615	121.824	200.496	168.834	170.913	196	169.494	172.627	171.586	113.891
CALCOCO2	37.3023	46.852	41.9065	41.6158	63.9266	61.642	25.3724	90.9317	45.8753	60.0571	76.891	55.7461	54.425	67.4785	54.9435
FLJ10324	6.77711	-5.09006	1.56837	11.4821	1.16448	1.48899	7.33712	4.51217	1.98287	1.94277	4.54736	-1.43151	8.16199	3.27432	1.22889
TREM2	0.225401	3.5547	3.91278	-0.458304	-0.502706	5.7489	6.04441	2.78119	5.67354	3.09315	6.14951	10.052	3.32898	-2.84383	2.28152
ADRA1D	3.56943	8.05583	6.77057	-0.0694903	15.2278	-2.85345	3.45289	3.51354	7.0007	5.48258	-2.11627	11.757	8.2537	3.80791	12.5593
LOC642369	10.3255	13.5019	8.25562	1.36277	1.99693	8.22862	5.30743	1.96611	6.02158	-1.18935	-0.539376	2.79263	6.25288	2.26294	7.57746
ADRA1B	7.48954	11.1229	5.11609	2.05802	12.1557	4.63993	0.1462	15.887	3.47389	8.75193	6.7597	1.03302	13.1692	-0.479711	12.8024
TREM1	-0.979064	3.53165	0.174792	-1.36126	-3.88684	-2.15004	9.19451	-11.7347	-7.25971	-3.5037	-12.1407	-2.86817	-6.9426	-2.71635	-0.51543
ADRA1A	2.33156	1.09892	2.2023	-2.41505	1.08181	0.028682	3.99408	0.462318	-2.25882	-3.95188	-2.90279	-1.04965	-1.34117	1.45207	-2.18945
LOC642370	1.05018	-4.19416	-5.38447	0.169962	0.583186	-2.12687	-0.537301	-1.18891	1.41673	-7.26452	-2.22503	-4.67954	-1.42639	-0.83555	-6.02256
RPL7A	111.595	143.048	145.151	75.5302	108.371	123.254	131.431	51.6757	25.757	92.4092	57.0408	34.7178	95.7757	153.235	142.45
LOC642373	14.7586	9.45453	22.7109	31.0928	21.7501	5.93312	17.8483	28.7698	30.0504	41.2156	18.5654	19.442	19.4286	40.0391	12.3629
LOC642372	-0.92719	-4.19444	-4.71303	-2.93865	9.54047	-4.17682	-5.83449	-0.957649	-0.619991	0.192759	3.53191	-2.07062	-2.8271	-5.39669	1.2249
LOC642374	-0.0351873	2.28497	-4.70256	1.36257	15.3968	2.72032	4.65158	6.12875	2.91357	2.06341	0.724372	-2.01588	2.27255	5.92542	5.30563
LOC642377	1.34265	1.00387	8.25552	6.02262	9.54143	4.24649	10.8207	3.72902	5.66699	16.0384	4.23571	16.5171	13.3936	13.0024	7.20062
RNF17	7.29392	10.2844	4.8119	15.4844	6.85481	3.32109	9.28613	13.0265	8.32757	1.46939	4.71497	3.3753	4.27455	5.60996	4.83092
LOC654346	21.0601	14.3833	30.401	37.005	8.48509	31.4446	7.36613	32.3848	11.036	18.0456	15.9102	15.9274	17.9532	11.1625	38.0048
LOC727787	0.743098	-0.471049	7.01871	29.483	16.2497	14.4145	-4.22526	41.2156	0.19787	9.82098	6.5632	4.0149	8.22716	4.64386	4.37695
LOC497190	-1.3986	-0.923111	12.577	5.33023	12.1601	9.83509	-2.70226	-0.657552	4.56524	2.61467	0.81602	5.86062	-1.28177	6.24384	-1.24197
LOC654340	-1.23043	1.94649	3.92462	2.7587	-2.33135	4.38028	20.4601	1.36114	7.20403	6.92207	15.4965	7.02181	5.49967	8.49872	15.5916
PDCD6IP	207.2	165.918	219.511	218.584	228.823	131.81	51.8568	116.003	144.665	145.622	138.924	214.034	182.329	90.6261	52.6972
LOC654342	14.1978	3.9062	9.83668	1.43236	22.6318	8.73957	2.24755	-2.50292	6.47478	-3.02903	1.3201	2.98602	2.97596	-1.14007	-0.229566
MEPE	-2.52115	7.18783	-1.35802	-1.15936	1.03672	-2.69965	10.3006	3.48163	-1.88779	-1.87288	-3.4347	-5.83554	2.7503	4.65546	2.2569
LOC642356	1.34391	-0.832199	-6.13477	6.02563	-3.11231	4.24495	-5.72135	-2.80435	0.9284	2.90807	-5.28116	-1.90114	-1.41223	1.43594	0.91254
LOC642359	-5.3619	2.91683	-7.44737	-1.06768	0.598405	-6.84379	2.76762	2.07535	2.45316	3.16443	1.00387	2.75435	1.76514	2.54431	2.72766
RANGAP1	294.003	433.225	254.348	348.661	286.87	530.75	931.821	228.828	588.821	484.817	551.957	423.33	387.089	304.731	662.778
ADRA2C	-1.61318	2.11821	1.03726	-4.32048	6.09427	1.01659	1.66557	0.648575	4.82809	0.701596	-0.279589	-0.381468	2.87536	2.15869	-0.677548
ADRA2B	-1.40408	9.91549	14.3384	-7.00051	-5.81892	25.6746	12.2825	-2.9501	-4.40756	-7.89162	4.01782	-0.483273	8.95326	0.0671033	6.90377
ADRA2A	5.75101	15.0236	10.3249	6.03421	15.3156	9.03995	10.5725	0.176138	18.4888	39.761	5.91925	27.3917	25.5376	16.0307	2.75231
COASY	298.09	291.685	259.996	328.841	294.993	411.335	634.611	159.622	249.619	280.883	230.883	208.111	195.482	211.65	285.336
LOC642360	2.70592	-2.53388	-0.0223216	1.36421	4.9504	-5.28648	-3.55662	-0.515908	-0.0132642	-0.632267	1.00295	3.89782	-0.0351873	0.638184	-0.452872
LOC642362	-0.124931	-0.707698	2.75763	7.19872	12.1106	1.45396	0.061051	7.18107	7.92649	5.69211	7.69155	4.38888	2.5736	11.4373	10.6197
LOC642361	26.375	19.6942	24.1559	5.17714	20.5859	14.3886	19.8381	12.5865	4.02	15.6319	11.213	16.5009	12.0349	29.8119	32.7483
EVC	3.26506	13.0904	10.5118	5.37268	1.15962	26.6929	9.80458	2.64989	4.24873	3.72083	9.76706	12.2661	4.81791	-0.451107	-0.383416
LOC642366	-1.86082	4.5793	9.18667	30.9352	0.597979	1.73499	9.56269	-0.974625	4.37457	-12.8274	-2.61627	-5.07027	-1.17818	-4.86697	1.63389
LOC727791	1.45998	-3.4601	7.01547	1.43781	7.45699	-3.74892	5.16087	30.6395	8.12621	12.1987	10.2249	6.47028	5.29279	8.35536	7.74208
IL3RA	-0.0151385	3.55145	11.444	19.3094	2.88405	5.94481	5.51062	18.9757	8.45339	0.462349	2.04023	3.55517	14.0255	3.08061	21.0188
LOC642365	4.76591	9.45632	-4.2406	5.13248	12.5571	-0.21788	3.35187	4.61468	3.50904	5.86776	6.24052	0.179362	11.3993	27.1241	7.49156
LOC654335	-8.18608	10.5722	0.227262	-0.0328529	2.93826	7.49697	0.0660662	48.3317	26.7038	16.4324	17.3057	9.12995	7.37592	20.0162	26.9509
EVL	1098.87	816.235	749.458	1709.24	1016.91	1102.17	2009.9	1048.88	1476.52	672.4	1126.83	1182.68	872.433	1258.89	1486.96
SPEM1	-0.969843	4.11719	8.4411	-3.55901	-6.93637	3.52288	8.3537	2.69627	-0.349002	-2.33198	-0.988488	-0.986054	1.22928	-3.1102	2.06361
SFT2D2	8.33015	12.1861	7.20822	12.8037	-2.33584	2.72572	0.902376	9.74577	-0.350698	4.62532	0.567952	-1.22597	7.92224	5.26999	1.95022
SSX2IP	20.005	19.6092	25.1671	-5.05305	13.6799	6.02857	-2.83597	4.62048	6.02013	24.8764	41.2256	37.7139	18.3737	-0.459552	4.0215
SFT2D1	909.937	829.129	1022.9	400.234	669.422	601.013	284.059	1547.79	587.407	734.022	1528.63	1159.93	1343.18	1175.47	1319.85
RNF31	88.7851	150.713	101.346	167.771	168.562	274.01	259.664	68.4302	163.383	97.0312	93.2922	69.9839	125.128	101.257	168.13
SMARCD1	144.686	216.636	165.906	127.155	199.513	350.466	202.514	116.397	205.638	167.325	252.716	196.757	175.903	125.894	212.77
RNF32	57.864	24.9236	37.0051	43.896	82.489	6.05764	16.9711	35.4337	61.7044	53.0524	29.9735	74.0988	50.241	111.874	10.8806
SMARCD2	237.649	366.475	321.203	425.742	299.562	657.564	196.617	292.376	383.998	286.173	276.973	207.779	200.347	205.065	223.792
RNF34	191.148	233.603	201.366	165.397	175.953	262.052	220.771	193.536	225.276	223.289	230.407	205.862	221.067	240.603	246.605
SMARCD3	26.562	53.9534	18.483	11.1017	35.4587	18.0109	52.9536	30.1325	21.5907	11.2089	12.1981	5.31765	18.9843	18.3502	32.5901
RNF38	61.2382	128.043	96.2123	44.0993	75.0889	69.875	66.2842	57.4692	76.6886	75.5733	121.061	88.174	73.44	57.0509	72.0327
LOC400214	4.66931	14.4109	13.5064	9.64469	21.195	21.6435	11.0959	33.3562	8.49372	19.8933	19.7321	15.6065	16.2476	24.8918	4.20155
ITLN1	36.8737	3.53561	10.6569	7.19428	6.38043	8.12934	10.0652	19.0554	119.616	20.4532	48.2554	11.369	15.0408	55.6549	5.47837
ITLN2	2.89626	4.27369	-4.64251	9.17215	21.3599	-2.01276	-5.73276	4.66782	12.0646	3.33741	0.167201	7.71319	6.02038	3.81363	0.219873
MKI67IP	273.792	329.972	278.906	99.1742	199.227	195.37	123.084	371.089	147.621	227.665	390.976	208.699	310.765	278.567	504.21
LOC642393	11.9759	12.4115	10.1551	8.61237	12.6906	8.8653	18.2072	1.34858	4.05732	1.88492	4.90923	1.12377	-2.34396	-2.37351	-3.83846
LOC727761	63.2225	48.115	47.7243	4.22442	35.2964	73.9901	22.071	40.3151	20.8964	21.8866	70.9482	34.1815	49.7971	34.8994	54.9906
LOC727762	10.7275	15.1031	21.0535	9.13691	21.6074	16.0801	22.9153	14.0105	28.6304	19.1381	16.1329	12.4431	17.7259	13.8895	22.2517
PUF60	1085.78	1099.85	915.375	1410.57	1219.01	1811.93	2005.6	1260.24	1558.61	1549.58	1623.99	1362.87	1333.81	1474.31	2022.04
LOC642397	2.58279	1.47014	-1.65185	4.44553	6.68407	5.19582	1.18679	5.05663	1.90047	1.76161	4.43271	1.69052	4.52652	2.47953	1.65819
LOC642399	15.4934	6.78005	8.76901	38.0743	23.3897	32.1595	28.4094	23.6611	15.0383	9.90642	9.17659	10.4432	11.1205	17.8457	16.557
LOC642398	2.40506	7.13885	2.54186	5.67002	1.5196	-0.139699	19.1901	12.872	6.71444	12.2249	4.77611	10.6264	9.07839	14.1659	10.8144
RNF39	33.2197	46.0046	24.3562	69.8172	17.5518	68.6713	88.1156	57.5549	63.5475	119.939	65.0082	45.7215	190.374	91.7188	59.6737
GCN1L1	116.266	126.367	85.3423	183.954	105.005	220.199	330.037	56.594	200.094	146.783	108.116	138.113	75.8311	65.0833	80.3787
LOC400221	2.28405	5.13105	-4.62023	-4.6525	1.01991	-0.341275	21.0086	-4.20181	0.376572	-5.05833	-4.26647	-8.38959	-1.28027	-0.63599	-3.54103
MEST	-1.84208	-0.12493	-1.51162	1.88521	0.164633	-1.73572	-2.8598	-2.90115	1.98468	0.118735	-1.48343	-2.46201	-0.821439	0.808614	-0.612541
SMARCE1	127.292	143.025	174.465	83.3415	127.675	119.141	209.544	103.598	93.5348	123.954	132.23	63.692	98.9528	131.725	169.615
RNF20	423.33	547.327	530.75	589.429	509.536	398.673	582.998	430.076	593.288	401.42	577.027	477.002	450.655	376.021	276.333
RNF24	100.832	191.39	151.767	113.914	135.354	156.577	80.0031	96.9232	198.921	130.102	107.383	69.9754	111.877	44.6823	74.1426
RNF25	23.5896	19.3299	27.5377	14.001	-6.49712	41.2463	18.1004	13.164	18.7778	19.0576	19.5975	6.66227	8.57746	10.3298	15.8727
RNF26	64.8088	91.0344	64.7975	44.9941	64.7589	167.661	52.6443	44.4756	49.2183	32.9294	60.4286	43.3468	63.6867	53.5985	58.5908
PNRC1	15.1399	5.17143	-0.481322	1.56642	2.05339	5.5233	-4.2923	26.7476	1.38954	9.17259	2.87174	8.00507	-0.506093	2.69573	5.67044
PNRC2	292.107	313.592	261.278	106.925	178.989	193.777	192.357	264.024	185.813	191.858	319.546	246.426	317.862	338.786	262.868
LOC642381	3.34475	0.16942	4.21443	47.9614	4.93315	1.73589	5.90249	4.96692	6.77281	5.93803	9.157	3.93858	4.66174	2.25855	-1.37639
LOC642384	-0.0365435	10.2313	-2.52511	1.36243	0.582194	5.19583	9.55519	7.58831	15.1467	7.61348	0.612935	9.45711	10.5432	4.47152	6.5632
LOC727773	11.9436	7.95459	8.62198	27.1578	14.3726	3.9636	4.73209	9.23659	7.23842	9.92191	4.32879	7.34414	7.2266	5.24402	2.91363
LOC642383	5.93335	-6.51865	4.21436	-2.9412	1.99717	-3.11741	-2.60268	-4.59617	-2.10637	-2.75367	-6.28001	-6.98458	-6.78465	-4.64251	-6.4161
LOC642387	-4.32005	-5.93111	-9.80096	-6.28426	4.93488	-6.14549	-3.55835	0.366727	-1.19564	3.25629	-4.55995	-2.13954	1.72969	0.473644	-8.00678
LOC727778	-6.13032	-1.77364	-8.98015	-4.40617	-2.40525	-7.71955	-0.00612436	-4.25069	-1.92958	-6.6837	-6.23493	-0.953202	-2.03416	-8.93549	-6.14729
LOC727775	2.97421	-7.24529	9.9102	1.43174	-2.33779	-2.0087	1.34814	-2.15562	1.2388	-3.59115	-4.63221	-0.0427953	-2.60333	-0.531206	4.96601
LOC642380	-7.87956	4.103	-2.52489	18.1258	-1.06553	-4.32461	-1.14968	10.0392	3.73402	4.93388	7.2192	4.27968	3.72687	4.26925	6.05493
BET1	71.99	64.1691	72.0897	101.338	29.0276	43.4357	20.005	70.3491	8.49332	69.5755	76.9779	92.5008	65.0726	85.7008	71.6118
LOC642293	-1.85746	-2.00164	-10.6653	1.36406	-6.10942	-6.49119	-5.83399	-4.61973	-5.0232	-6.19714	-2.49345	-10.193	-7.76208	-2.95149	-8.00614
LOC642295	1.96973	-1.36175	4.77296	7.30863	0.655849	0.20816	2.07267	-1.14251	5.26535	2.47189	3.20632	3.22344	1.23903	6.93322	1.69213
LOC642299	344.853	310.765	296.661	248.178	315.374	211.608	170.1	426.285	191.167	313.454	203.537	238.704	311.098	440.57	175.258
LOC642290	8.76214	2.0265	6.67605	11.1215	1.85551	3.73642	1.32821	2.2383	10.8221	8.33675	15.2305	12.8029	8.47756	5.18115	5.83157
LOC654264	-2.71959	1.02068	-1.37881	10.8125	5.9442	3.46194	-2.72369	2.07191	-1.27157	6.1266	2.89249	3.5137	2.89665	2.97137	2.99221
LOC654260	28.2776	17.3144	17.851	48.8254	1.95819	32.9481	14.5678	6.56714	37.9637	24.8918	22.2088	36.51	33.3367	24.5001	32.1663
AFG3L1	8.7503	18.3546	16.5824	8.9453	12.8701	16.1654	1.81759	4.42284	20.6291	11.5025	9.86819	8.04134	15.7959	4.96486	12.4158
LOC642282	62.9997	33.4274	37.341	47.5467	28.8267	8.88202	15.9878	21.1426	26.1398	50.6499	23.1494	28.9277	32.9465	24.0388	8.5297
AFG3L2	391.914	445.55	273.344	381.148	286.198	845.951	589.429	417.948	401.285	370.667	501.326	359.597	339.31	432.765	503.581
LOC727751	17.6487	13.491	13.969	6.03573	21.7335	25.2547	7.19046	25.5399	13.3963	16.5282	8.04732	9.55159	5.17043	4.67052	10.0233
LOC642287	2.79004	-2.62019	-5.36903	8.96868	5.27738	9.14033	-3.54967	-4.62073	-5.425	-3.91858	5.29328	9.92899	-2.01306	-0.647977	4.59829
AKAP9	4.42006	0.610823	2.84191	6.95976	-4.66225	-0.270942	8.81673	-6.2703	-1.99875	-3.06986	-1.68318	-3.70165	-2.67373	-3.28241	-10.5504
LOC654258	2.97337	-7.21083	-5.36095	-5.4253	10.3171	2.71318	0.0663391	-1.24639	-3.42574	2.23511	2.05175	4.3895	6.01492	4.60316	0.747727
LOC654259	5.15951	-3.92745	-9.90539	1.43256	4.19144	2.05219	0.0661593	18.1243	12.9095	3.53014	18.611	2.37703	1.03302	-3.84715	23.7458
LOC727759	7.46552	-3.46129	-3.4229	-2.11994	-0.475346	0.742642	-4.19711	7.03295	1.7613	-0.227287	0.602407	6.89352	-1.24351	3.45955	7.17385
ANKRA2	236.663	313.166	260.441	152.703	137.433	177.351	134.099	329.058	295.512	297.088	295.61	331.819	332.971	290.917	219.196
LOC727752	-5.47119	-5.07375	-8.28163	6.03596	-7.89021	-4.87765	13.4766	-1.86132	-3.88976	-1.85539	0.476329	-0.749287	-0.985892	-1.58166	-2.00983
LOC642280	6.6268	0.0460055	3.65732	2.65528	0.135755	7.37333	-2.54962	9.03173	9.12335	-0.488217	7.25971	4.10736	-0.146449	7.77952	6.22764
BEX4	183.354	140.499	161.903	63.0514	124.419	113.016	29.8828	188.286	41.9045	87.302	129.375	89.9354	127.891	139.636	108.208
GPM6A	1.69014	7.96063	5.69979	12.8619	6.58196	6.73742	14.5374	3.50149	6.19003	11.2766	7.05468	2.52739	6.22067	3.74705	14.4847
BEX2	177.303	496.265	281.14	115.272	155.579	146.226	179.091	406.502	203.63	152.946	354.387	112.516	277.856	309.535	407.341
BEX1	27.8633	24.8739	21.5214	5.43747	12.946	12.3504	3.64165	48.5286	26.2611	12.9211	15.381	7.28915	27.2114	22.3771	8.17522
HIST1H3J	-7.2564	-0.486401	-1.65593	2.93974	-6.49119	-1.24929	-4.79138	4.25201	-1.41163	-1.18019	2.70743	-3.11804	5.30186	6.26903	7.48447
NHLH2	0.973548	4.10866	5.30294	-0.416838	-1.93193	4.40374	-1.41973	15.4571	1.0603	5.96626	2.6359	6.52819	3.27508	7.34575	3.2492
GNG10	87.0487	72.9706	50.8979	16.9932	65.2892	34.1882	10.7229	64.6089	14.8669	29.3221	90.6503	35.4591	49.8328	65.3267	90.7046
HIST1H3A	-0.449435	6.78987	6.35847	1.9741	3.51972	-1.24897	2.97695	3.89143	0.638304	9.18717	8.74477	7.8281	4.10715	6.27023	2.27941
NHLH1	1.41459	-12.285	-4.61498	0.896437	2.96289	-0.510793	-1.8534	3.56688	1.65277	-0.148693	1.7845	1.76828	-5.32523	-5.47119	2.05558
HIST1H3F	5.52401	-2.10938	8.65925	4.47644	-5.41482	8.13631	-1.50096	-2.74004	-3.07049	-12.9349	-5.46892	-1.21767	-5.83181	-10.0999	-10.1856
HIATL1	129.969	93.6369	123.498	95.8629	118.462	74.2767	59.4157	121.611	54.4386	102.585	112.968	111.564	99.604	72.434	75.5176
HIST1H3G	5.51685	-3.45777	3.90418	7.36945	-6.49175	9.16322	12.1939	9.92466	-5.13717	2.93044	4.2695	8.76506	6.92996	6.79771	10.5609
FREQ	120.058	104.509	127.292	170.818	114.886	122.207	221.606	143.629	221.661	151.223	133.055	151.212	127.483	128.622	127.197
HIST1H3H	17.4904	2.0543	2.76575	1.9756	-1.26666	-0.358134	-2.08052	1.56405	2.97747	3.34849	3.17261	5.32477	2.53311	3.54467	0.462786
LOC727726	28.523	20.5474	29.4842	39.5564	32.9338	25.625	4.26836	30.0577	30.0424	34.183	30.0829	35.9782	25.9752	16.1401	24.6826
HIST1H3I	3.91912	1.03136	4.3684	13.195	3.51903	-2.0473	7.92399	24.7681	10.5681	14.8463	18.7783	10.304	6.38056	14.3041	8.24775
HIST1H3B	-1.68864	2.05237	2.76666	-15.0951	-1.25535	-2.04585	-1.50135	-8.52851	-3.86283	-3.42125	0.824395	-5.42339	-2.23625	0.199002	-2.85368
HIST1H3C	7.60189	2.05518	2.2707	7.29251	31.1531	4.92226	-4.86318	14.3076	-1.18237	3.37623	2.90757	-1.88315	4.65158	7.61313	12.168
HIST1H3D	15.2395	7.47242	8.95729	-1.91625	-10.1747	6.38716	15.6036	-3.53178	-0.943105	0.596105	6.76664	7.47479	3.52256	1.41386	-4.20972
GPM6B	51.0635	38.0782	50.747	28.4794	58.0923	15.4641	30.9796	52.6365	52.4423	43.8981	46.8698	60.3166	53.9582	46.1356	16.5046
Rg9mtd1	-4.61305	-3.75146	-0.924368	5.15241	-0.240215	1.23602	-0.0718386	9.44685	11.2049	9.67002	8.01902	8.75209	9.90956	4.68004	8.13347
HIST1H4K	60.0318	73.0799	37.9869	67.7822	71.4453	83.6619	80.124	87.2012	47.8591	54.2097	48.8254	65.4854	51.892	61.6612	96.6203
HIST1H4L	0.895356	-2.10875	3.49969	-2.86492	-1.26589	-4.17795	-3.42633	-7.27128	-5.42043	-2.03014	-7.68191	0.0712893	-8.17744	0.156842	-5.07375
TREX1	-2.12108	-1.24498	1.43292	11.79	-2.77268	8.23588	-2.49022	3.06559	0.76562	-3.42786	-0.543167	1.58825	6.43271	1.31939	0.378916
TREX2	-6.27704	1.37261	2.25999	-2.74044	-6.94014	9.17819	-3.02849	-0.93684	-1.87225	-7.72487	-0.539716	6.39514	2.97337	-0.539504	1.22442
SLC33A1	19.2899	19.3389	19.4385	-1.90663	5.16368	18.5902	-3.91143	3.3658	-2.13425	13.4059	0.741461	13.8231	33.9883	1.7392	4.21689
IGFL2	-5.42785	-6.4111	-6.96927	-1.87776	2.02752	5.50308	-3.66894	-3.5522	-1.17396	-3.52369	-5.31141	-1.25877	-6.14053	-5.73024	-5.3555
IGFL3	7.74539	11.8722	11.8562	6.36025	34.9077	16.9465	104.992	7.0277	67.9515	13.2974	3.34791	46.6606	6.34208	123.254	29.1369
IGFL1	-10.8247	1.64047	8.74735	-1.87684	7.71892	1.3924	2.94778	10.8273	9.53642	2.0028	2.94792	4.37861	4.76378	18.6009	3.53444
GNG12	122.371	54.3044	49.1385	-0.619991	28.4204	21.0007	-2.10655	69.5958	11.4267	20.8296	64.2752	65.6843	58.4793	28.0334	13.6757
GNG11	5.29896	37.7906	66.7919	0.248371	40.2431	98.0111	61.2375	23.9061	-3.51943	3.81588	48.5453	8.95393	25.4645	7.71009	4.27797
GIYD2	-4.76277	3.16355	6.27954	-4.88603	1.07938	5.51524	6.8733	-3.69824	-1.66132	-3.52074	-2.8795	-1.22169	-1.85472	1.81764	-0.559331
GIYD1	19.1999	21.3671	15.4542	2.25544	9.90246	54.4494	55.6914	5.04093	17.5232	14.7293	21.5833	9.04437	7.93651	19.7337	29.4038
GNG13	-1.91979	0.561943	-4.20554	-0.626678	-2.33198	-9.90761	0.726746	-2.24675	-6.29302	-4.6334	0.36849	-5.09169	-0.986745	2.29427	-0.260341
HIST1H4A	1.86952	0.194856	-6.4946	2.93875	-1.25307	12.1826	-3.42433	-2.00772	-1.66437	-7.79445	-6.28376	-5.04418	-3.45433	-1.65281	-1.77521
CDAN1	401.956	529.562	484.752	752.559	595.12	674.399	1120.93	353.644	1313.07	462.861	361.01	352.598	698.014	380.56	666.06
HIST1H4B	11.2971	0.91133	4.35908	1.98782	2.22912	0.594221	-0.221889	6.14683	6.76075	10.8125	10.012	0.90984	5.88563	6.22958	28.7759
IGFL4	-0.821889	-0.659573	0.928823	1.03672	-1.18483	-4.59891	-7.77902	1.00878	-0.508681	1.14916	4.38413	-3.48726	-3.47728	-2.03951	-7.22556
HIST1H4G	-7.2531	-4.32685	2.76594	-7.35544	5.27865	-2.8454	-1.43041	-1.27655	-2.03629	1.75621	-1.93101	6.91458	0.821658	-6.96	1.46522
HIST1H4H	23.0109	9.81408	8.96574	-4.10056	-1.25616	-0.358971	-3.10478	1.73485	5.92195	4.47518	6.36501	10.8396	6.79822	5.14385	9.66556
LOC727735	2.96945	3.41343	-0.884535	21.08	-0.924734	-2.24923	0.931562	-0.675226	-1.78872	-0.938593	-0.697234	1.49496	-0.99996	-2.51998	-1.88711
HIST1H4I	2.07535	7.37189	0.735166	-1.91661	4.10584	0.821057	0.815403	-0.839501	-0.259823	8.1365	0.482042	-0.842923	-1.35298	3.50032	-4.5602
LOC727737	-1.22916	-5.72653	3.65371	2.75785	-3.43569	10.3123	0.448953	2.22813	2.22813	6.03262	1.22816	6.92188	5.91145	0.594053	1.94192
MEIS3P1	374.203	357.093	388.306	516.182	602.581	191.594	245.662	417.505	431.225	375.642	350.873	432.212	462.21	432.212	145.427
HIST1H4J	6.14502	12.9149	14.669	-4.10333	10.3019	3.25498	4.84706	-1.26326	-2.62356	2.29183	6.91676	-4.30068	5.27781	12.8134	-1.19399
HIST1H4C	1370.01	2016.86	1404.57	1641.21	1064.31	1735.89	3592.17	3171.11	804.738	1298.22	3025.01	905.823	2372.18	3466.98	5375.61
ITM2A	54.0771	169.41	128.936	65.3049	51.1074	50.9964	55.8659	118.906	61.6987	28.5708	88.5131	68.0016	77.6533	112.365	102.603
HIST1H4D	6.14951	0.195721	6.77281	1.99928	3.51387	-2.04594	-3.09892	-3.74994	2.05455	5.89293	1.05887	-2.05877	-2.09521	2.9647	-2.61044
LOC727732	1.52038	6.64627	3.97964	41.5836	-2.67168	8.08488	-0.622295	4.27953	2.79435	-0.87657	2.2561	4.60068	4.03493	4.99809	4.05847
RAB40AL	-4.6173	0.353142	2.69493	1.06081	0.361475	6.80124	-3.56251	9.13417	8.04637	5.91537	0.0667331	7.00784	2.53717	11.1918	3.1729
ITM2B	3030.36	2710.02	3817.42	1356.22	1851.58	1749.8	345.396	3108.16	1097.29	1911.69	3111	2742.52	2666.99	1605.89	1943.7
HIST1H4E	8.85852	-4.40484	0.734998	-4.59256	-10.2001	3.17027	2.28129	7.72495	-5.0626	-5.47429	-2.32626	1.14536	-1.41414	-2.8424	-3.48272
BEX5	8.48884	49.0021	22.1155	4.61149	-1.66232	-2.80839	4.24292	15.1503	3.57507	0.16355	42.284	0.24202	34.8227	12.5662	16.9565
ITM2C	451.546	180.335	369.388	228.317	246.573	335.984	341.303	431.91	255.361	241.552	283.121	239.627	276.286	316.817	463.546
HIST1H4F	-0.455391	5.33097	-1.41251	-7.35668	2.2297	-2.84557	-0.219829	4.97271	6.34917	16.0325	10.5714	1.45095	2.05339	7.71319	5.49198
ACVRL1	9.26343	1.47127	10.3433	-1.38961	10.5472	29.0294	26.3246	1.23683	9.67119	1.14612	9.82703	14.7609	20.6225	-2.79456	4.66379
OLA1	-0.864034	0.39493	5.50646	7.01919	3.78542	0.938232	0.424122	8.27196	0.558231	5.71781	2.33586	2.13259	1.17882	0.467443	2.56569
QRFP	-2.1013	1.85886	-3.54078	65.2669	4.97735	-6.03481	2.91025	-9.41236	-3.06319	-4.94716	-5.84493	0.173022	-4.18454	-2.8066	-7.62491
ANKRD9	120.213	162.332	149.603	79.3078	54.1554	282.152	188.262	162.776	179.645	229.962	226.725	143.866	146.624	269.724	360.979
EPM2AIP1	162.035	185.939	234.472	210.132	200.252	209.544	111.487	110.704	178.526	198.554	147.755	141.108	199.698	128.36	109.22
GLIPR1	19.5123	7.82051	13.5862	1.77671	2.24567	0.73412	-2.02497	2.70278	1.78412	3.4918	18.0111	19.9155	17.3188	23.6611	59.7358
SNORD109B	4.96713	-2.0895	7.46831	1.36939	7.01288	10.0468	5.30111	18.214	12.0691	6.80762	9.83147	10.5789	15.7576	15.0266	6.14452
TNFAIP8L1	783.943	163.533	311.405	452.482	433.991	100.401	543.961	450.286	676.924	491.408	109.834	786.955	405.464	452.102	147.633
ANKRD1	-5.09311	2.26887	-1.67665	-2.10782	4.76075	-6.17452	3.36331	3.47954	6.22591	2.79045	4.38796	-2.14495	-0.917303	0.728671	-2.83725
GNPNAT1	-5.06292	9.55562	-0.929921	-1.19197	-0.344596	1.72729	5.29734	-1.43065	3.16842	10.5395	3.9161	3.55389	1.48222	2.91383	-2.42582
TNFAIP8L3	62.9226	24.4002	42.0615	93.1448	49.9781	29.1283	125.122	32.91	73.4563	55.8109	23.3843	85.423	53.3278	96.0415	23.5779
DLAT	190.928	174.663	225.081	162.158	145.8	120.96	131.422	202.982	182.828	189.092	257.489	219.151	188.074	208.814	209.087
ANKRD2	-9.80489	0.21418	-3.58848	-1.66682	0.456366	5.1429	0.21418	1.99105	0.350959	-3.96054	2.01779	0.919097	2.04502	-0.636896	-1.16895
TNFAIP8L2	6.81197	-3.67858	7.58507	5.13582	-5.12287	-0.0739136	9.36284	2.98879	-0.0491236	-2.01252	-1.05604	1.44414	2.28891	-0.947301	2.28637
LOC400163	-8.51607	-1.77586	-5.31457	-6.53722	-4.25069	-4.28219	-2.6241	-8.26861	-9.69105	-7.78758	-8.60814	-2.01096	-12.8274	-4.19577	-8.62324
ANKRD5	0.013644	-0.159252	-3.83363	4.84162	-2.20341	-1.1522	-4.0924	-3.8915	0.0352381	-0.599615	-0.115972	-0.656789	-3.00092	-1.8583	-3.13804
ANKRD7	-2.37948	0.453489	2.55737	3.98269	-4.56742	-0.619802	2.11005	2.58293	6.85098	2.56695	3.81909	10.2965	0.112237	1.41783	6.4136
ANKRD6	94.2589	116.414	116.445	175.144	93.2871	114.173	182.831	184.154	281.347	164.641	147.807	88.8425	127.742	166.614	132.45
RSPRY1	528.599	558.836	456.802	895.975	590.982	738.688	783.175	473.333	1007.23	673.083	569.855	627.102	623.951	537.85	553.001
AVPR1B	2.76268	0.331403	3.72733	-6.11794	3.64587	10.0502	5.18835	-6.50243	-8.95241	-2.81265	-7.1172	-8.74773	4.19658	-9.4346	-4.65077
STRBP	376.021	234.968	370.667	310.563	422.893	149.561	243.921	330.037	300.06	450.786	283.435	383.505	316.231	358.69	154.041
AVPR1A	8.94439	0.330751	-0.974177	1.78169	1.42341	13.5054	-9.24605	4.97043	-2.83226	2.24445	1.23818	-6.85549	6.2408	-2.33155	-3.84086
IGFN1	-0.822114	-7.69667	-2.41154	-1.89497	-1.1844	-8.39741	4.27342	1.48109	-1.89606	2.77052	-0.234054	2.94111	0.735166	-2.76362	0.560137
RPUSD4	388.477	654.316	542.168	469.964	362.172	778.033	776.341	575.641	656.362	588.344	961.865	384.437	544.733	712.961	817.459
MDFIC	41.7207	18.0287	26.1055	3.06944	13.9712	3.53414	8.74915	15.0527	4.94303	5.85572	24.2872	25.0597	27.4006	3.4875	6.92551
RPUSD1	77.6797	123.394	64.7923	201.819	87.7049	135.668	170.681	146.883	113.733	129.058	139.741	92.2796	80.3705	150.072	272.39
FRG2	0.391961	-6.51862	-0.122947	-6.7189	-2.28872	1.87145	-0.573229	-1.72129	1.71239	-4.57162	0.637991	-3.23994	0.667958	-1.78066	1.34518
RPUSD2	213.033	225.88	261.29	293.04	227.507	378.219	479.69	321.625	419.08	358.428	316.675	296.828	329.183	334.602	403.737
FRG1	139.555	178.128	166.774	182.888	96.6766	204.151	373.545	228.493	172.48	170.3	295.857	187.249	163.989	187.371	328.295
RPUSD3	154.474	154.457	126.079	211.059	172.238	272.136	187.056	187.352	136.263	174.865	197.077	147.755	122.01	208.127	241.257
STRAP	254.563	292.938	234.882	112.624	168.148	212.82	155.189	224.423	94.6079	231.19	230.461	111.959	222.278	276.055	332.634
LOC400174	45.3514	14.0146	33.5849	92.2796	123.169	22.8331	4.22884	2.78819	2.70887	4.35945	11.3855	15.8512	9.55743	6.37276	-0.362452
GAGE12G	-0.343423	-1.14395	2.53927	5.47894	-0.634708	8.95108	-0.835859	26.9339	17.3395	23.9122	15.8742	9.19006	12.3607	16.9336	13.5072
AKAP8	93.3221	161.383	130.198	163.069	130.217	150.497	148.889	89.2351	177.871	199.924	143.804	127.197	117.412	148.096	162.671
AKAP7	21.5808	21.2934	21.914	40.8511	27.3268	13.3134	23.2534	28.1845	23.4181	18.4719	37.0256	37.2551	33.8826	48.6514	27.561
AKAP6	14.8463	14.4268	12.359	11.8942	3.56257	2.27922	-0.922661	0.183555	24.2056	4.28662	-3.05311	19.3102	11.8456	-0.150402	-2.08849
AKAP5	-2.51465	-8.28093	2.69882	-1.7724	-3.84644	-1.05842	-5.20579	-8.52505	-6.82436	-3.25487	-5.71793	-9.89938	-3.52647	-10.193	-8.01667
AKAP4	-2.26373	5.25944	-3.69361	1.4259	0.840191	0.012048	0.635781	1.47482	1.18035	4.15212	3.02233	-0.175506	0.452771	5.97037	1.8707
AKAP3	14.6756	3.64915	11.8397	1.86124	-2.32654	19.9178	17.645	0.620143	11.3709	3.359	-0.650058	10.6684	15.8667	18.1012	-0.0374443
AKAP2	4.33381	2.04988	8.2474	2.29975	3.15083	1.6414	8.03963	12.2589	9.56728	4.82651	2.87445	7.55572	3.24815	13.2318	4.75841
AKAP1	15.7544	11.0969	11.4754	12.1483	11.8319	23.6508	14.0104	35.6057	20.1781	29.6945	36.0174	19.3412	24.8688	18.6159	44.8896
GAGE12I	-0.456982	-1.71782	5.15072	-0.748027	30.0758	2.10263	-0.493933	7.01998	6.77244	4.17705	7.85803	4.7928	5.59302	6.81579	15.2946
OLAH	2.06341	1.78192	-3.85597	17.9353	0.33163	5.18549	-3.87525	-4.67479	-2.80071	-5.82649	-7.5363	-6.03284	-3.50556	-5.72351	2.94869
PDZK1IP1	29.1417	19.3179	28.0318	8.22938	57.6488	116.894	91.5037	15.314	38.2822	46.6548	35.5613	92.4092	30.5397	33.9897	164.281
FAH	28.5076	65.4762	45.3958	5.92242	44.8689	91.3863	74.2858	35.56	16.2414	57.6165	42.8881	17.645	29.4859	41.9931	39.4813
FAP	-4.18384	-2.85254	-3.5424	-5.34527	6.8959	2.37598	13.005	4.63169	4.11054	8.46847	6.47653	2.71675	9.91646	18.4679	7.58679
DLC1	3.7631	-1.97666	3.17284	-2.52366	-3.90753	9.16499	8.49059	-2.15929	-1.86123	-0.237947	-2.26586	-2.3834	0.179642	1.51543	3.97068
FLJ10374	10.0376	45.4036	18.5617	4.92111	11.1215	39.4855	47.5334	-1.13718	22.838	22.8267	28.4173	19.7253	9.55592	38.9612	37.3141
FAT	262.479	253.067	368.689	195.555	267.312	429.211	472.617	236.782	274.76	203.645	359.65	337.046	426.684	182.367	199.712
FAS	4.34667	14.377	12.3366	7.13697	0.648714	5.24414	3.37366	9.534	10.0935	7.16959	6.58642	12.3901	14.1799	9.52777	21.8324
FAU	3491.89	4458.95	3883.94	2922.35	3805.69	5138.11	3505.18	3859.38	1997.44	2847.16	4209.14	2283.34	3214.12	4125.21	4923.85
LOC400197	1.34078	-0.93579	0.560137	2.7318	2.90738	-2.06323	3.73191	8.46847	16.3321	2.04216	6.81904	7.02833	6.02732	11.613	7.01207
MOBK1B	3.07116	3.64453	14.6728	-7.23742	6.34208	1.37643	8.75036	-15.8274	-8.85366	-8.69988	-5.61512	-2.78102	-7.69043	-10.011	-7.70676
FLJ46321	4.09953	-1.70479	3.20098	7.87886	16.3249	4.78058	7.22129	12.317	7.23647	11.6145	9.23142	2.2365	8.0051	7.48928	13.5526
SIRPD	-2.70014	-3.54797	-3.08303	0.248071	-4.19911	1.23776	-1.68901	-4.63719	-6.1638	-4.29502	0.615391	2.88192	-1.77424	-2.78236	-3.06677
SIRPG	37.7618	33.4736	31.7573	25.0674	7.26346	31.1041	45.6671	33.8537	23.7569	24.481	35.2275	21.9992	23.5587	35.5729	43.9156
FBL	504.738	1046.62	691.681	544.553	529.332	1033.43	1065.43	502.223	648.404	504.407	913.633	377.701	532.615	830.768	950.55
NUSAP1	45.6329	53.4971	33.8857	51.3101	28.2746	125.91	201.348	63.9565	27.1433	32.9138	205.89	32.0292	122.578	82.248	341.751
LOC389365	4.67722	-1.76181	2.01878	-0.676474	-4.65224	2.7687	15.1545	-7.99009	-6.16524	4.28417	-6.54014	-13.7227	4.61355	-0.00643614	-1.86538
SIRPA	53.8293	101.374	79.5923	16.5262	48.2753	89.9173	112.679	22.6262	45.7871	28.1889	68.5139	42.9825	91.4522	29.3873	69.4508
LOC389362	-1.24889	1.01256	-4.23608	4.27596	4.48215	-13.9542	-7.09288	-4.63997	-3.54503	-6.85732	-2.72549	-7.75547	-2.82308	-5.32936	-1.21213
LOC390349	-10.2067	-0.0362808	-0.649864	2.7722	5.48142	-1.2475	1.33224	-7.7129	-7.36342	-1.8686	2.93816	-4.24594	-1.22931	-6.8118	-4.69008
TBCCD1	18.02	13.4943	18.4898	11.52	33.7935	19.6083	12.0444	35.9024	25.021	33.5323	39.128	31.5463	25.6449	34.1597	38.5902
ANGEL2	279.272	419.954	439.9	404.59	306.385	404.211	516.449	407.827	623.635	502.588	447.649	395.467	498.459	402.304	452.482
ANGEL1	53.1118	42.8761	62.9638	53.6127	31.8413	66.0485	47.382	2.53187	70.7353	50.4742	44.7613	40.9535	34.8093	40.8419	18.4761
GLTPD1	38.2715	53.6378	40.0418	39.258	14.9166	69.9754	32.5984	27.7074	60.3897	53.9286	33.0217	34.6941	30.1655	45.3858	35.5727
GLTPD2	-0.364514	4.39572	-2.22477	0.331026	-5.84531	-0.92719	-6.85644	-1.93101	0.555581	3.81619	-3.46375	-3.94613	-3.33176	-5.07991	3.65436
TBL1XR1	27.9069	41.2497	28.3969	24.3033	-0.449435	22.0953	34.5111	3.91676	-7.74046	0.729599	8.22054	21.2854	11.3922	-1.85668	8.5848
RGS9BP	5.90064	2.94463	1.41225	10.228	-0.244569	2.2643	1.95602	5.31345	-0.0592384	6.34391	6.81818	2.0122	3.56208	0.90647	-2.84365
LOC390354	1892.75	3102.12	2060.15	1182.68	1693.42	2783.54	1375.72	4052.23	1601.1	1565.41	4796.26	1776.76	2545.7	4194.4	4908.26
ELMO1	9.64243	6.19512	10.4609	4.02261	8.9805	12.4241	6.72832	2.33956	4.92196	-3.48243	2.76044	9.96795	6.70223	4.20219	4.84636
ELMO2	49.534	44.3459	40.2667	40.5785	63.2804	44.4863	30.7351	69.8083	45.5647	37.6237	56.2208	54.8575	37.588	50.6025	56.3677
ELMO3	161.889	192.49	148.916	272.944	179.414	366.809	248.588	133.136	224.059	181.667	150.046	143.851	113.759	153.841	228.254
RELL2	6.34108	7.20674	20.6356	1.02124	2.78954	14.7713	12.5341	-0.52493	-1.18526	4.46744	-5.12686	2.25172	5.75382	4.95074	24.3111
LOC389370	4.67855	-5.40125	2.0049	8.74107	10.3259	6.39825	-2.61063	46.0939	12.5328	9.81451	11.8908	3.17795	5.93213	21.1805	8.04367
FLJ22374	451.343	114.379	238.005	462.44	277.712	66.9017	456.802	273.792	329.072	328.903	111.666	332.452	349.695	298.45	83.1341
FLJ46347	2.75295	1.56	-4.2512	-7.54121	-2.04313	-0.357183	3.81619	-0.238365	-1.16252	-0.531552	-2.74478	-2.25363	-2.95634	-2.81574	-1.67609
ZC3H18	26.3201	28.7728	18.1111	4.11911	1.39792	40.0744	59.0996	16.9738	21.0062	27.7928	25.1649	39.4426	24.4953	6.26556	40.9218
ZC3H14	30.4818	15.6881	29.809	11.5534	16.7022	12.4997	5.95143	28.4183	16.8401	21.7389	35.4884	35.5825	29.1206	23.1812	10.4263
ZC3H15	95.2297	99.7521	107.852	58.3898	43.0404	59.8497	51.8996	58.9715	12.5358	53.3331	111.74	68.2643	62.5666	99.5716	126.735
TGFB2	-8.51527	8.8494	-0.0168073	1.06176	5.88047	11.8414	5.27905	0.196656	-1.50176	-2.50797	2.02531	2.28519	9.45778	-4.23572	-1.50629
TGFB1	2.14483	1.36857	1.14457	-1.25664	-0.518254	2.87793	-2.8657	-0.241457	-5.84913	-2.86326	-0.22209	-7.25899	-7.24566	-7.5363	-7.21083
TGFB3	20.4663	21.7609	39.271	54.9103	82.3697	86.0919	53.6259	73.2936	42.2088	31.6719	32.9359	24.0139	43.0385	20.2534	5.49153
BFAR	160.98	154.899	137.51	52.7491	132.034	156.392	115.583	112.896	79.6551	88.7921	119.616	91.5131	93.9314	89.0683	85.1604
NFKBIA	1175.47	1244.3	723.952	1301.8	1042.45	2405.67	1675.28	1215.99	2299.54	923.519	1416.44	982.843	1386.23	589.876	1008.7
DLG1	-4.40484	-2.01017	8.48847	-0.639829	-1.78399	-3.11654	8.96617	-8.43392	-5.38073	-6.98238	-3.56772	1.46928	-2.76752	-9.65203	-3.92928
FER	21.0046	13.1717	18.0122	2.88151	3.35966	9.83115	8.03794	-1.26724	-5.05305	6.78945	-1.65413	11.2	2.24371	2.95288	1.32239
DLG2	21.5583	24.1968	24.6936	5.90679	7.63238	9.19438	23.1042	5.11919	16.2686	33.6514	3.78658	10.3558	13.7377	7.24017	6.31551
DLG3	27.4218	19.3914	31.6954	19.5441	5.19739	25.7684	4.82074	9.19634	17.342	16.5001	18.2722	23.5111	16.796	8.99819	4.67558
DLG4	83.3281	34.3218	77.8739	73.5604	111.666	34.6941	96.4286	55.8014	103.159	55.7802	20.5543	64.7681	88.089	59.2055	28.0108
FES	30.6205	46.2895	32.9481	65.8896	21.0305	131.537	118.655	32.6306	63.7837	29.0294	80.4586	32.7156	37.0519	90.3869	113.368
FEV	6.4751	6.13358	17.9401	5.48572	5.94343	5.52684	40.6545	4.67152	4.11497	-3.55675	3.57589	-4.61635	0.447684	1.97573	3.46662
DLG5	11.6031	10.3426	16.932	-0.647028	-0.0314209	8.56705	20.3556	-4.66544	-1.38729	-3.41794	6.13069	9.93105	-3.33504	-10.497	-7.09934
LOC390332	1.36774	-2.73568	4.61483	2.77249	2.00737	16.4234	-3.43162	12.57	4.21338	4.2795	1.22167	6.92571	2.92876	6.03421	7.18232
DLG7	35.3076	21.3886	8.25805	-6.93832	-0.446058	9.64739	31.5774	25.2614	-1.91504	3.17585	57.5229	8.75918	28.3026	4.11533	114.236
RLBP1L1	2.68393	-2.03338	-5.62165	10.3101	2.06159	-10.6003	-0.972496	-2.42009	-4.19942	-2.09638	-6.17685	-10.5771	0.214812	1.47112	-3.5438
RLBP1L2	2.68407	-2.77803	-12.7436	0.21309	2.87497	-5.41415	16.2124	-0.0158022	3.07129	2.71318	0.171901	1.45446	5.48508	-4.28543	8.33267
TGFBI	300.06	1679.4	744.72	201.068	463.472	1213.25	785.875	448.29	246.731	297.824	606.332	308.809	592.209	396.438	1167.3
GRSF1	612.98	505.313	604.154	436.221	446.805	526.889	541.315	565.083	618.236	668.5	547.659	606.045	544.553	667.627	628.163
NFKBIE	11.7566	14.3369	13.1855	51.9792	40.6007	25.7462	36.4999	4.57125	32.804	15.7529	31.1495	20.4663	30.0644	25.5416	36.4952
NFKBID	11.4472	9.12261	10.0292	65.3646	6.26842	11.4472	24.576	5.29918	6.9253	5.30149	7.02595	6.8959	3.90943	8.04054	2.29083
NFKBIB	21.9726	17.8231	21.1065	7.66241	40.3782	33.6736	18.6158	14.2323	11.2433	19.9661	15.9907	17.2681	17.6953	9.59218	25.153
FLJ46361	1.56352	-0.707945	-4.21541	-5.08352	-0.218281	3.50925	1.38704	1.20457	0.0437203	0.14846	3.64739	-4.50466	-0.232949	-2.44663	-2.96974
FLJ46363	-9.62041	-2.04885	-2.841	11.0965	2.00332	-0.356199	7.21394	20.2675	5.27081	4.01247	5.30466	8.36231	1.3848	10.2141	2.04337
HIST1H1T	8.7635	-0.488082	-5.09957	4.46837	0.626019	1.8541	-1.39294	4.10064	0.585476	1.43616	-1.42952	2.54628	-0.255749	-3.08094	-4.62825
DHTKD1	39.6786	35.3911	23.5857	79.334	11.9802	75.6409	20.2733	0.600378	15.7536	19.7242	26.6287	30.6675	14.1235	2.92429	5.74865
STS-1	109.914	204.581	169.695	137.913	157.495	174.782	294.65	136.562	437.425	194.628	259.967	234.709	182.906	176.278	126.821
ZC3H7A	92.8672	91.749	116.42	84.1621	114.928	99.7605	41.4008	103.791	115.398	107.205	135.868	129.606	119.136	77.7098	87.0079
ZC3H7B	7.10248	13.3799	-10.5848	-3.50503	2.45781	0.347616	4.62048	-3.83567	5.51662	-1.36019	-0.0154073	3.48769	-1.38651	-2.23868	4.93661
NFKBIZ	338.145	307.09	239.247	511.86	439.974	400.238	737.832	494.091	814.11	446.71	304.441	748.856	626.749	527.148	503.266
HIST1H1D	3.37404	0.229018	-5.09922	0.154472	3.93823	8.13347	-5.93018	-2.03785	4.0308	5.19282	1.77513	4.36016	1.44684	0.747727	1.2254
LOC390387	-1.21256	-1.61745	-4.70603	7.48015	-0.286276	-4.75159	5.15023	-1.62281	0.888979	-0.883928	1.68372	0.453911	-1.29934	0.927108	0.811728
HIST1H1E	1.94682	0.227824	-3.33558	-4.17877	-2.8465	1.02193	-0.229121	-4.24717	-1.91835	2.9242	-5.73	1.55721	2.27355	0.927913	-2.72388
HIST1H1A	7.60041	4.21645	5.27469	6.80203	19.9124	3.55954	10.6549	32.1154	16.3305	13.4751	11.444	7.46404	2.89411	11.9042	10.5404
HIST1H1B	6.81412	-1.68508	-5.34294	6.80149	-7.08344	-2.85236	-3.11463	7.16955	3.25905	11.369	4.58883	2.45824	0.195035	4.22523	5.8342
HIST1H1C	233.534	144.621	114.991	194.226	167.963	111.084	457.075	392.08	73.468	166.831	203.268	147.082	115.938	244.219	282.147
FGB	-2.29619	5.67338	2.46879	25.4381	167.471	7.91499	3.27581	-1.3419	-3.13244	-6.4381	-3.33969	2.59394	3.95946	1.90371	0.739281
Magmas	345.627	337.321	325.697	454.121	312.674	482.423	696.499	415.987	533.722	444.528	317.021	236.149	334.997	484.154	815.55
FGA	4.4555	9.86525	5.46899	23.023	157.8	8.37554	18.917	16.4611	11.2024	10.0426	14.1882	8.34996	9.46625	14.4695	13.6961
FGG	-2.23108	1.04206	3.06144	-0.358654	70.9884	0.724549	-1.2369	-2.36007	-2.59009	-3.05449	-2.8417	-1.6126	-4.79481	2.68719	-2.30769
FGR	19.2634	13.8001	9.50431	10.3756	17.3771	44.0395	66.8762	4.97513	36.3056	2.7605	18.07	19.2875	21.5161	15.3213	42.6242
PALLD	529.755	531.28	753.591	719.268	687.385	469.703	667.627	513.698	460.912	938.9	617.935	715.549	620.562	462.593	403.938
FLJ46358	0.462148	-1.23955	6.02518	2.0569	0.584816	2.91134	1.63941	-3.08483	-1.67346	0.361698	0.569697	-3.92401	-2.70386	1.46805	-2.80411
CHMP6	29.1134	31.5611	35.6234	8.82048	21.4754	60.713	67.1079	25.5675	46.2558	45.1403	40.8985	31.5845	37.4415	44.8968	38.9001
CHMP7	14.1917	22.5503	18.0224	4.27862	3.37547	42.3737	37.3301	5.48121	13.9662	8.86025	26.2751	8.05428	29.8508	-0.272606	24.6941
CHMP5	561.842	325.604	445.931	192.945	278.324	131.916	50.9062	507.38	82.6963	170.174	379.463	312.673	350.011	297.251	192.132
RGS18	19.0657	14.4101	6.68245	-8.41991	7.00625	-0.00169804	7.71275	25.1506	10.0423	7.01109	20.6343	26.0176	17.2236	4.76407	1.00403
RGS17	103.261	227.169	144.98	206.21	132.709	297.824	283.709	194.321	357.093	247.186	141.7	171.891	171.79	196.363	108.714
RGS19	57.148	85.4324	56.2515	54.333	11.1132	113.022	57.9281	60.0813	54.3185	49.4033	82.7642	77.1313	39.4893	130.439	208.206
RGS14	12.9115	8.47933	30.8451	8.12647	16.2278	20.6312	31.1542	23.1867	20.8282	18.0177	26.1016	8.32834	11.5265	17.7464	16.5139
RGS13	7.23768	-1.68482	2.53412	7.66807	7.14995	4.14493	3.08108	25.6255	11.2441	10.4923	13.2741	10.77	6.78966	15.8391	4.87721
RGS16	4.27714	2.94279	9.56747	34.8161	2.87242	4.76365	7.70022	15.0543	6.4832	5.29299	6.66293	1.86933	5.88822	21.0336	7.16978
PALM2	3.93134	2.22107	4.97587	-3.00193	-1.76622	10.1049	7.20594	-4.02481	11.9941	13.1118	0.0971365	-2.48698	1.47568	-4.22141	-2.51341
FLJ46380	2.28031	7.18112	8.00536	0.215454	-2.04384	19.8908	4.24187	-1.06553	18.5836	-0.235485	5.84499	3.52488	11.8299	11.9824	7.17125
DLL1	120.418	353.461	239.088	193.152	135.19	137.874	88.9792	131.905	354.29	204.471	202.69	147.51	342.392	154.8	107.336
STRN4	48.9003	45.9123	41.7124	47.8729	38.1673	91.0732	48.7462	50.6023	51.7752	52.8551	39.0298	47.1797	33.0758	41.5794	60.2236
STRN3	236.271	229.543	211.364	108.436	148.995	136.263	47.9552	239.436	116.402	217.592	275.496	209.636	250.529	160.458	124.853
DLL3	10.617	4.47703	-2.38479	-6.37127	-2.82926	2.39869	12.8904	-4.43358	-2.02332	-4.59922	-0.359779	-3.67401	-1.38054	-3.64389	-0.35234
DLL4	-2.0204	1.05054	-3.49217	2.76814	1.75317	0.739101	-1.66511	-4.61263	-1.66146	1.22565	-5.04557	0.4739	-2.25309	-7.78323	0.553422
IGFBPL1	12.2857	11.873	-3.51943	-9.75984	-1.17862	6.04342	3.7298	-6.03329	-1.14395	-4.66133	-6.26583	2.27582	-0.667147	-8.86122	19.3248
PALMD	1.6585	-1.20101	-2.04852	2.97421	2.77628	13.4981	-1.39698	-0.49595	4.60488	3.72573	1.38645	-14.2439	3.44946	-1.17011	-1.41878
LOC390364	-2.06419	-6.22303	9.36029	2.77234	-5.09957	-9.79903	-6.37818	0.926438	8.96034	-0.257268	5.11585	-5.47159	3.18047	0.4739	0.928025
RGS20	0.223089	4.89315	0.522187	0.620732	-1.10407	-7.62656	2.19756	-2.0314	-0.00732165	0.903226	2.00014	1.75924	0.125973	0.209156	5.96969
LOC390367	-0.65551	-3.47792	-1.05731	4.38287	2.00718	1.75045	4.19854	26.3201	16.9474	18.6819	23.191	7.69912	11.1035	15.5027	19.8862
RGS22	593.554	188.75	458.312	840.708	698.139	44.4756	319.319	411.472	437.961	289.529	117.537	529.332	339.449	367.346	48.5519
CLASP1	164.167	208.486	238.126	245.662	190.067	211.771	308.135	142.906	241.281	184.934	99.0543	201.673	190.946	173.85	155.743
CLASP2	45.8727	38.1897	38.7443	33.8351	26.6972	8.93357	-0.636273	31.9432	24.9775	33.2134	35.879	29.5852	23.7473	2.22799	2.78888
DYX1C1	33.0291	6.12281	20.2714	24.2326	20.082	2.20079	17.2191	44.6414	19.0508	22.5897	5.7533	39.6743	35.3967	42.5617	2.07854
DLK1	2.32784	-1.57342	-2.1635	8.14869	0.653268	-0.403481	-1.08109	0.316846	0.721196	5.72539	3.78689	-0.566685	0.372284	0.140654	4.74441
DLK2	20.7738	120.838	90.6004	23.6324	35.9522	69.8993	85.1413	101.833	58.2085	29.914	162.606	22.3906	201.622	61.6895	133.997
FIS	8.75484	14.5757	14.0082	4.75616	11.3828	5.6643	12.5767	16.8506	36.1991	34.1295	11.7612	12.8093	10.6665	16.952	10.3473
LOC390372	3.09249	7.57652	4.61468	38.9596	4.49503	7.6065	24.0316	7.46831	6.27003	8.49372	-2.83885	6.05522	4.21463	3.08556	5.94763
RGS10	62.6118	27.616	44.6427	41.1086	15.448	64.4964	38.4138	31.1703	14.1248	13.9871	66.6787	41.4221	41.5028	68.0126	97.1732
RGS12	56.7493	95.8278	65.2046	85.4687	72.1253	116.994	162.243	70.9567	121.084	107.947	104.193	67.126	97.6564	87.0041	144.683
LOC390378	6.37062	4.77936	0.162956	2.77384	-1.66897	-7.64909	5.59504	2.06647	-4.27119	1.9415	2.78643	-1.23152	3.09014	-3.50034	-1.28373
LOC389396	-1.24981	-9.85416	-2.23567	5.88518	29.5762	0.90681	-2.33338	-0.505483	-2.52301	0.179199	-1.14684	2.71835	-4.30138	-3.44875	-1.50497
RGS11	-2.13627	1.87063	8.04642	5.15634	5.24369	8.6494	-0.939395	-2.48154	1.54112	-1.98286	3.3453	-4.13754	1.1711	3.79874	0.918321
LOC389394	444.528	156.705	340.502	287.17	401.285	21.5706	125.228	586.295	190.046	347.921	71.9126	251.945	410.419	648.404	116.27
LOC642849	-3.52711	-1.86971	-2.22638	2.91966	2.69172	-4.2165	-1.93121	10.0117	-0.846683	3.33535	-1.17924	5.11672	-4.5841	1.64973	4.62886
LOC389633	-5.63355	-1.85238	-0.84728	0.259648	-3.07276	-5.04451	2.86956	3.90852	-2.1359	5.15739	-2.00188	-5.62165	4.61088	-0.949484	-3.44123
LOC389634	10.2215	4.85097	6.14476	1.25021	10.8221	-0.252107	5.516	-0.00612436	1.00121	2.70048	2.9779	4.01024	8.4725	-1.93466	3.35793
LOC389631	-0.0220845	-5.34733	7.3725	14.9176	2.00167	10.3019	-2.70582	10.917	4.27686	2.87781	3.50048	0.359734	5.16416	1.86975	2.70541
LOC642843	-1.91542	14.6576	5.51451	-2.94395	-0.957539	9.18973	9.65046	-6.78679	-5.74574	-5.72733	-1.43154	-0.936626	-0.661241	-11.0733	-10.1747
NOC2L	25.9905	11.0959	17.6511	18.4847	1.76115	46.0746	13.1855	-0.744637	3.91658	-0.262048	5.16354	6.47695	8.96284	1.75916	5.15981
LOC642846	-1.91692	6.03657	-0.066523	5.88421	-4.23237	-0.841474	2.72736	2.24287	-2.00969	6.05058	6.38925	1.47112	5.18644	2.26201	8.96786
LOC389641	19.702	47.412	29.1369	39.2659	38.4656	23.0049	44.5942	30.7533	25.6695	45.8586	88.7788	26.7145	54.1794	31.857	70.7051
LOC390637	30.7514	9.13199	15.8627	-0.820788	7.03169	9.16352	25.753	-0.745772	30.7514	43.7058	13.16	23.3688	21.0265	8.36949	28.6577
LOC642830	6.76664	-1.87242	2.98274	-3.04441	1.63389	-0.820788	-0.538469	-2.419	-4.60023	-4.19543	-3.83184	-5.13595	-4.31096	-0.0447571	-6.03462
LOC642832	4.23801	0.183977	0.609487	1.33442	0.448652	9.19058	-0.538149	1.24003	0.736112	2.94563	-3.56012	-0.935963	1.40695	0.73031	-5.08596
FRS2	-2.89756	0.308902	-0.489021	6.63174	10.0276	-2.15983	-1.60997	0.575135	0.432183	7.21117	2.72043	-1.23417	-1.24839	1.68296	-0.484959
LDOC1	286.173	231.101	273.26	121.309	196.617	167.771	66.4851	244.219	109.227	112.052	150.156	145.147	96.9356	173.444	166.797
LOC642834	-0.942506	-5.04418	-2.0749	-2.94075	2.69085	-3.52395	-2.7415	17.3051	3.81285	3.54263	5.51558	-1.24264	3.35011	12.5582	6.02955
FRS3	30.6493	37.9869	29.0084	17.9291	4.23502	41.2388	8.75821	9.46249	84.3261	61.0684	39.3702	46.9564	33.7821	58.4823	36.8206
LOC642833	-0.942222	0.184228	5.51749	4.65158	3.93858	13.1963	1.32272	-0.0480003	-3.0403	0.634924	0.719772	-3.91814	0.371362	-1.41582	-2.04313
RABL3	54.9103	37.9529	36.4914	1.1406	5.8337	28.0144	8.936	22.2374	15.2387	27.7059	47.9933	59.5722	35.731	59.8391	45.3655
RABL4	1038.98	422.241	761.735	926.985	998.957	261.108	505.856	613.38	529.83	786.955	338.539	651.045	595.14	616.885	223.15
NOBOX	-0.0414745	1.57353	2.75867	3.22531	3.81935	2.07284	3.09572	-4.884	0.169365	-1.77204	-3.55456	-0.616222	-0.540386	-2.4259	3.09994
RABL5	72.8569	21.7625	41.2497	102.727	16.9425	3.72931	40.4323	10.6593	19.712	28.3939	5.18067	38.6571	35.8803	58.0231	4.64874
FLG	-4.21628	-6.24004	2.95015	-0.933513	6.02451	4.96401	-9.64951	5.87708	-5.13734	-1.68038	-5.10714	6.7993	0.233376	0.585773	-3.33968
CDCA1	-0.0406753	-2.52427	5.28596	-5.30508	-0.0507777	3.17565	-0.842019	-5.61614	-3.90867	-3.92755	-6.9973	-8.54299	-7.26681	-11.7627	-4.20911
CDCA2	12.988	13.1839	9.36522	-0.670698	16.2362	15.0182	14.1966	10.4602	1.45134	4.00898	25.6431	9.04485	7.02813	18.8752	40.8377
CDCA3	14.2932	6.79204	16.5055	1.96474	-2.24965	11.436	31.0188	23.358	2.01911	13.279	35.0758	1.55093	15.598	24.3064	61.2965
CDCA4	20.3561	47.7517	27.5056	10.595	34.2373	45.3883	60.8699	25.8124	23.1697	22.347	64.4495	15.4613	30.6484	31.1643	63.2051
MFI2	-2.13954	5.92971	0.980948	12.7389	2.28805	-1.98904	-0.698363	-0.649382	0.237022	0.366887	0.10434	1.94342	-0.01329	3.2683	1.78625
CDCA5	62.933	77.5112	40.1544	23.7598	43.525	172.396	196.898	111.877	51.9738	45.8898	201.802	46.2583	81.6994	48.7432	345.976
CDCA7	31.165	72.8973	66.383	6.52789	66.7638	157.493	168.622	53.2794	37.5767	29.9503	124.027	44.8554	86.3145	72.7817	186.92
LOC375010	-6.28555	-4.24892	-2.32654	2.76306	-5.02944	6.01801	-3.32876	-7.37716	-2.95858	-1.18398	-6.24497	-6.97746	-1.06515	1.0096	-0.744351
LOC642863	-2.77309	0.640097	0.600562	-0.983644	0.447999	-0.222912	4.68134	7.02833	3.17619	4.96924	2.37678	4.11697	4.01572	0.72464	-0.619344
CDCA8	27.8937	19.9075	11.0838	6.35585	7.38381	46.6548	60.0506	25.0742	5.1779	21.4958	52.4312	26.1081	12.8286	14.5695	85.4324
LOC642864	4.62869	-3.06829	-9.61458	0.147411	-5.07407	-0.220894	1.32179	0.157136	4.57413	3.4985	3.54675	-3.09919	5.2871	-4.63997	2.97989
LOC642867	2.53733	-3.07155	7.5792	5.87073	0.450307	-3.48166	0.339068	-0.986376	0.567952	-2.14215	2.90054	5.18612	-4.28925	1.04151	0.460451
LOC642866	2.54116	0.639099	-2.40851	-2.95055	9.43861	-6.53212	-3.47372	0.917233	-0.971824	4.29132	1.95176	2.02197	-5.08497	4.01505	6.245
LOC642869	9.14192	2.03908	-0.263537	5.86927	8.4509	-5.84878	-1.92818	0.329947	4.60254	5.2684	1.95891	-1.3942	2.75526	-1.50497	1.35998
LOC642859	12.1943	8.07515	2.46686	0.239183	16.8141	5.05299	7.89859	-0.632375	4.61752	0.24502	0.253922	4.46837	0.555693	-0.666831	5.51037
FUCA1	1239.64	962.782	961.021	1417.47	1213.25	1294.29	996.258	789.239	972.5	1175.47	695.343	1251.6	820.142	635.56	731.233
FUCA2	60.6793	39.2057	58.2266	44.805	41.315	53.765	32.2831	77.8636	36.8918	52.3932	52.2252	43.2681	45.2637	36.1124	58.2454
LOC642852	60.7094	24.1299	16.8567	27.2342	64.825	9.19006	41.9791	31.7666	57.605	28.305	1.02787	49.9413	42.2803	68.886	5.88386
FN1	5.34803	-0.536493	1.79157	0.0667257	-2.52466	1.119	2.20854	-1.93737	-1.84024	-4.89532	-6.31378	-4.45622	1.7256	-6.84505	-3.24002
LOC642851	-0.0218564	-4.17859	0.598934	-8.02467	-2.24055	-4.19711	-7.88929	-4.19522	1.06399	-4.64787	2.22943	-6.253	-4.21117	-7.20922	-5.85967
LOC642853	-2.7732	9.9318	6.39825	-2.86606	1.63807	0.739246	1.3225	19.8712	5.94205	1.55182	4.76498	0.376572	6.80973	2.05391	7.02323
MAGOHB	-0.468296	9.17841	-1.28389	-1.06515	2.00121	11.3682	10.2145	1.40636	-1.15848	-0.444588	-6.39361	4.01386	-3.87598	4.62027	-2.24552
LOC642856	12.0554	-3.06914	4.63267	2.91929	3.91862	1.44414	-1.05903	12.3792	-4.65414	-0.443672	-0.258594	2.75278	5.17225	1.75848	4.97338
LOC642855	2.53752	5.18947	7.01389	-8.02307	5.40315	1.64002	4.97376	-2.06268	-0.838072	3.37133	-2.9543	6.02786	-2.07338	-0.982299	-0.0545235
LOC642861	2.54568	0.180756	11.3923	4.64904	-6.15262	7.46058	-0.538569	-3.6658	-6.18257	-6.11017	-3.52321	-9.27451	-3.52711	-9.87129	-5.42647
LOC389676	13.3924	-11.7934	6.91797	2.78614	2.00177	0.913176	-0.671754	-2.01955	-5.93552	-0.500942	-3.08895	-5.07345	-0.50702	-3.25487	-4.86087
LOC652211	8.03236	7.58272	-3.5022	15.0591	2.53376	-4.67201	-5.8494	-1.41034	8.66199	3.18047	6.76075	7.48257	10.0266	16.0428	2.99472
LOC642889	6.2476	-5.04759	-3.08094	1.34596	2.69701	4.28159	-3.47044	-0.218146	-2.41319	1.9686	-5.37863	7.85082	1.85616	1.99717	-0.490991
LOC642888	13.4812	-1.50522	7.02486	-7.89415	5.40077	9.19216	-1.06323	-2.79682	-4.28019	-0.494205	0.605475	-0.835029	-0.366906	-1.39966	6.64853
PANX1	19.3316	17.8546	33.7764	4.37099	6.24187	26.9282	6.92679	15.8691	4.68204	25.1506	19.3023	34.8266	4.56276	17.6526	29.8736
PANX2	74.7957	65.2636	192.49	139.998	52.2363	36.8922	51.7596	0.445197	128.079	279.658	46.9354	188.074	41.1277	116.507	50.243
LOC652204	2.89947	7.58318	-4.65907	-8.60814	0.466915	-1.19372	6.35483	2.89679	-1.41118	-1.91614	2.77671	-2.02497	-1.65482	0.597356	-1.77424
LOC642891	2.8748	7.45863	-5.30238	-12.097	-7.23324	1.45433	-1.06369	-1.06347	-0.663593	-5.34898	0.33233	-3.05917	1.8607	-0.925665	-0.847787
LOC652203	-7.88858	-3.85317	5.48001	-5.84239	-4.3056	5.11609	-7.75433	-6.9382	-4.68133	-1.92217	-1.38074	-9.4644	-1.65491	-4.20891	-7.19568
LOC652202	-7.88658	-1.93321	6.34372	1.56596	-0.539376	1.45106	-4.27119	1.4388	-0.516406	1.01046	3.08973	-0.933696	-3.41012	-0.462391	4.27522
OLR1	17.4919	12.5821	10.8189	11.1179	11.8794	22.8261	27.4108	35.4002	88.7921	6.25019	15.3947	22.4697	17.6565	32.9311	28.4109
LOC390667	4.68742	6.02659	4.61718	2.77915	-2.94985	6.38689	3.8891	-2.24739	-2.868	-1.05738	-5.94472	-1.14928	2.00873	2.94915	-4.65924
PANX3	5.8462	-2.13818	-2.04717	16.2319	9.19296	7.93003	1.75093	4.7616	4.38044	3.93488	1.72947	3.32865	4.01422	4.47285	5.87538
LOC652209	1.14696	0.590852	1.37869	-1.19151	9.27762	2.88996	-1.15366	7.37454	5.90194	-0.748743	9.27504	4.92583	-0.46193	2.70908	-1.67852
LOC390669	4.24981	-1.42437	0.627198	0.25622	1.0022	-9.79148	-4.40617	-2.70607	3.33408	6.66424	-2.10835	-1.19179	-2.10305	0.58957	4.28089
SPHK2	386.503	462.44	272.39	549.771	364.245	423.33	412.661	335.366	711.323	553.434	586.572	624.336	548.73	459.291	374.932
SPHK1	15.5831	12.9906	15.1877	9.04049	15.7818	53.7106	46.604	37.4415	20.5003	23.1064	16.5775	17.225	19.0433	25.9653	53.5124
OR7E91P	12.4502	-0.645573	5.43771	-1.54963	1.24357	2.78618	27.4827	2.74955	4.89405	9.63442	3.45954	6.44709	5.27346	10.2652	1.89674
LOC652200	-7.64517	2.53363	-6.1638	-2.93631	-2.95026	-8.73739	-5.61427	-4.2559	3.53623	-0.478104	-2.03785	-0.920483	-0.63963	-1.06169	-5.39263
FOS	206.463	36.7179	62.0501	16.0328	91.1235	49.6092	82.6618	596.935	84.3305	230.805	107.485	48.5656	4116.62	1239.64	61.331
HCCA2	79.0694	99.7733	73.5604	144.042	57.9332	162.907	160.993	111.19	105.77	80.3787	100.841	62.0611	72.2113	124.133	131.537
FLJ36848	6.25111	8.84724	8.05126	9.15501	-0.830778	0.582957	3.36245	-7.24189	1.02443	-3.5086	-0.964619	-2.12791	1.14009	-7.09831	1.9968
LOC642879	2.53944	0.645685	1.43549	0.073127	9.43988	-5.13465	-0.53899	2.71346	-5.62202	-3.86073	-5.42	-3.33968	-2.118	-3.10438	-2.03885
SLC7A4	65.095	24.485	28.403	77.8407	9.13988	24.5795	80.4722	20.2558	100.373	96.9356	21.3673	34.7881	39.5772	16.235	16.0276
SLC7A5	9.82264	14.7727	17.3144	11.0758	-0.647977	65.4762	79.7061	-5.0954	32.7193	37.6734	66.6712	25.3852	19.7221	9.64138	65.2669
SLC7A6	57.4869	31.2745	41.2837	45.9843	82.8568	33.4197	50.9515	24.051	52.2335	27.3846	23.7114	43.9265	40.6933	27.2561	16.7048
SLC7A7	161.383	45.7267	98.9584	166.831	193.682	94.263	86.8048	152.373	217.127	157.24	69.9775	180.362	226.063	185.968	193.003
SLC7A8	8.71191	42.5025	23.3344	15.4613	2.46286	20.5694	16.6231	24.1899	26.7226	23.1766	13.1557	11.0844	15.8012	11.2532	9.26224
SLC7A9	19.4368	33.7764	19.5178	7.17304	69.9706	10.3265	12.5642	13.0925	65.8896	47.7677	5.15537	26.5533	38.5837	20.4585	12.5793
LOC642883	-4.69775	0.181844	-2.08254	16.2154	1.65361	-0.831655	-5.35645	6.76441	-0.254556	1.32084	9.56716	1.05583	0.208068	9.16722	9.13669
NUP62CL	395.161	129.058	295.053	335.781	349.695	64.8212	501.06	447.649	534.388	539.798	255.021	632.86	382.065	484.817	215.39
ELOF1	90.129	53.161	35.317	62.0397	106.099	65.8788	71.9858	50.0713	37.9567	46.5382	37.3327	67.4785	26.7056	70.7353	74.4803
LOC652233	6.13084	3.52578	9.17876	-0.0413615	-2.95634	6.3687	-5.62165	9.3592	9.46133	11.9069	8.48597	7.2949	6.15517	2.70824	7.00133
DLST	152.013	218.878	150.742	142.815	243.131	335.781	266.354	140.847	179.405	179.414	179.074	165.683	143.858	171.476	256.336
NOC4L	16.9608	15.1401	11.102	47.9291	32.4185	33.6063	33.125	17.2658	24.1488	25.3374	16.4188	14.5406	18.8446	16.1957	25.2441
LOC652231	3.3444	1.14209	-0.447204	5.86359	4.24752	12.5754	16.5514	23.7495	4.19475	15.7661	2.96141	3.07459	5.28297	4.21605	6.90487
SLC7A1	258.149	279.934	195.665	475.792	332.086	403.737	517.097	155.774	350.049	316.863	442.142	282.27	308.353	135.198	221.191
SLC7A2	384.092	184.853	421.786	515.237	447.022	9.91076	131.438	102.089	422.536	235.889	22.5806	406.968	169.007	80.7798	29.0185
SLC7A3	-1.48835	-1.01647	0.0469825	1.63243	1.05027	-0.0685425	-7.40939	-7.13577	-0.609719	-2.94382	1.06232	-5.21044	-0.466313	-2.3687	-0.411391
LOC652227	-0.49379	2.53399	-2.93609	5.86372	1.9756	6.26295	2.28557	3.91155	-4.71482	5.76159	2.69731	6.24562	0.149798	21.0195	7.38399
LOC652226	19.8797	18.8808	7.00591	24.6004	19.7321	26.31	2.28519	1.01316	10.5643	12.8016	34.6941	18.4605	33.8145	19.0589	13.3779
FRZB	2.26343	1.45407	12.5827	-1.06736	5.93448	15.2255	30.3292	-2.75433	4.24353	5.91666	6.47915	4.22136	14.3187	2.61386	4.56937
LOC652224	-2.7908	1.13661	3.73514	-3.05311	35.301	-6.68643	-1.1397	-2.7934	-6.28657	-4.79039	-1.50109	-5.30401	-5.72048	4.20331	0.163487
MFN1	18.7177	16.5195	11.0612	16.5229	25.2145	10.5586	39.5428	-0.66456	13.0477	13.2167	6.19793	12.1062	2.19878	6.90084	10.2309
TINP1	1028.92	1604.05	1178.05	477.814	551.422	748.678	407.224	1177.14	386.096	693.949	1934.87	943.973	1041.58	1264.88	1522.09
MFN2	108.425	147.525	158.027	98.1155	88.7788	286.505	293.04	89.7506	160.492	94.9919	131.431	116.371	125.228	61.6513	164.706
LOC149950	1.24239	7.49526	5.49721	3.07151	9.04252	3.3488	5.86972	7.50038	-0.676052	3.09336	3.88697	6.6708	0.614952	-1.16461	5.92945
LOC400506	25.3889	45.8685	33.7789	3.6524	22.3106	56.5047	19.3444	16.9393	6.92403	21.8488	48.6618	23.1995	20.0289	14.1056	12.9149
LOC389669	-2.84357	-9.83124	-4.62599	0.260317	-1.67689	-2.84455	6.9116	-0.495889	-5.01942	-0.979562	-0.0478714	0.153162	-4.30524	0.471601	-5.43807
FLJ22222	47.5983	42.7784	38.2603	24.4384	42.4173	51.1058	25.7468	26.2286	33.9741	52.6076	34.9011	51.1625	29.7284	30.986	31.585
LOC652222	1.44048	14.2858	-6.8085	-3.05462	-2.06877	11.4253	1.32315	-1.27032	-5.54671	-9.85818	-5.94668	-0.617764	-1.87474	-2.7753	-8.73345
LOC642895	1.39286	3.93429	4.63059	16.2134	20.4601	-7.53784	8.75605	50.3482	8.75605	2.90184	11.1951	5.66647	4.39217	6.55447	12.8298
LOC642897	81.6994	48.5429	47.7611	17.4932	67.8713	34.9077	27.9313	185.739	55.1085	70.7353	76.4218	76.5044	78.6375	132.612	111.294
NOC3L	102.838	139.741	153.553	111.316	141.528	177.571	464.487	348.442	513.05	291.258	357.841	310.46	293.066	287.479	534.829
LOC400509	9.15776	3.91234	9.64225	1.32667	-10.6238	-2.06366	5.16729	0.723013	0.592814	-5.27923	-1.14582	-0.0532638	-4.32972	-7.11856	-3.05398
RABIF	4.4987	9.63966	6.02254	2.54245	4.27946	6.45058	0.322508	0.10229	1.78937	6.38997	15.9315	4.24302	0.956932	6.80335	4.09062
LOC652217	-3.90164	3.17637	-3.53042	1.39711	4.24882	-1.19352	-2.60678	3.2604	5.83718	7.69877	4.65013	8.0516	2.28227	6.64743	2.02987
LOC652216	2.89899	-2.61828	-6.17496	-0.0418147	-2.06849	1.42724	-5.84802	0.46873	4.18813	11.5997	-2.72203	-0.226032	-1.21213	-2.73664	6.65916
LOC652215	3.34337	-0.841474	0.815794	-0.0400467	-4.87765	1.4548	2.74754	-9.8127	-11.4895	-8.39741	-8.53778	-9.2516	-12.6432	-9.08682	-9.76567
LOC652213	-1.15051	13.5921	2.00912	4.00884	-2.06862	10.0117	-7.74972	2.26324	3.36639	7.74136	4.58688	9.90956	2.74968	7.8444	2.53469
LOC389671	2.29427	2.92555	-0.846032	-0.670063	30.3318	1.76106	-0.968867	1.95791	7.72462	6.90637	3.49653	0.479552	4.26984	10.0222	6.67659
LOC389672	25.157	31.1108	18.0218	0.260561	10.8396	40.8455	27.0313	89.9276	41.2156	55.384	59.1862	30.341	52.744	101.181	77.8456
FRYL	25.7122	31.0875	31.7212	37.3149	51.2527	64.6356	74.1435	31.9514	56.3501	33.952	38.3708	35.4387	33.337	28.0903	63.4959
FRK	23.3718	35.5707	34.6988	8.4602	43.6948	44.7689	82.3899	63.313	66.6504	89.2351	44.2231	64.2586	44.8945	53.5862	41.2709
LOC652255	-1.14917	2.54283	-4.66776	8.22782	5.93007	4.26714	-2.70654	0.574047	3.93561	10.3299	10.3281	2.25867	1.41225	6.38602	3.64695
PLOD3	141.528	191.069	192.977	401.797	259.967	280.245	231.19	110.558	329.719	168.257	187.225	206.429	157.662	112.727	137.221
PLOD2	117.022	91.4523	123.99	141.324	130.979	173.131	125.045	130.261	169.193	138.884	153.576	274.704	80.9004	102.348	116.849
FLJ10246	2.27985	12.3721	5.11532	0.632157	0.568785	24.6703	5.85644	-1.68038	12.1934	8.66026	7.92987	4.6685	0.643573	10.6688	2.95066
PLOD1	179.091	239.744	233.534	286.074	237.507	489.288	745.135	191.768	278.906	207.194	289.285	257.459	271.725	164.475	218.878
LOC652252	-6.8146	-2.6181	-4.25642	9.91399	1.9783	-1.1844	1.32354	4.02573	-2.60571	1.40158	3.88899	3.91181	-4.28417	5.15595	1.45274
FRY	12.1695	8.25576	7.84657	15.8398	-2.24225	-3.82868	-4.68961	0.154154	6.15221	6.9253	-1.9007	18.0287	8.22938	2.902	1.24482
LOC652251	7.45747	7.82698	1.76912	1.39772	4.24013	-3.426	6.66613	-2.33496	-6.68706	-11.7419	-5.63128	-4.40696	1.1417	-0.987121	1.73279
ADORA3	22.9426	20.6696	13.258	25.0849	2.4306	36.0397	29.3492	3.88402	15.1164	20.0189	27.0253	15.2249	28.1014	20.8593	36.9445
LOC652246	11.898	2.54445	3.94014	1.3969	-2.06706	-1.19422	-7.75205	-6.15874	-6.83846	-8.26143	-0.242225	-4.61569	-10.9314	-6.15496	-5.27965
ADORA1	1.32402	-2.28644	2.29487	18.1588	4.84954	3.04458	6.06441	-0.104448	-2.82613	-3.18377	-1.10721	-4.37206	-3.4013	-6.21461	-1.69038
LOC255187	-0.661836	-9.37367	2.03467	4.20841	-0.933356	-10.4835	-6.5239	0.930597	1.75666	0.998454	1.24184	-5.04369	-0.440015	-1.40692	-0.637978
BNIP3L	283.818	239.559	280.647	184.894	240.928	133.033	50.8851	254.008	133.857	166.447	264.967	304.481	260.194	208.643	126.323
FST	13.0922	50.3139	61.9307	2.65229	28.4883	97.2138	100.465	45.145	25.0619	18.4569	54.1753	11.1852	30.8405	7.33652	75.2731
LOC652242	-7.65599	-3.75309	-12.1099	-3.02799	2.533	2.88869	-3.51155	-3.47309	-0.366419	0.242522	-2.09321	-3.5426	6.91246	3.37342	-0.844015
LOC652238	0.0677142	3.50526	3.94049	-0.0351873	-2.06892	-1.91787	13.4819	-4.58434	1.34066	1.01391	-2.06623	-3.88003	-3.47517	14.4109	2.25269
LOC652235	-7.6426	5.52357	3.49447	15.052	5.93112	-1.91758	-0.619991	2.90609	6.26262	2.92135	11.4106	6.81515	6.55757	19.6823	4.97718
MFNG	31.1148	23.2822	78.6074	2.99897	6.25111	60.6183	115.362	5.17708	27.3141	3.73514	24.3291	47.1034	22.9116	40.0646	78.6616
LOC652234	-0.498059	0.592684	2.77524	9.90707	1.977	-1.91835	-11.4849	-0.438638	-0.026841	1.42368	-0.53899	1.73932	0.931345	0.167781	-0.634054
IL6ST	-1.58991	2.37802	4.89001	8.3613	2.84633	-4.97498	1.18372	5.22772	-2.61715	0.870571	-3.01063	2.83814	2.13175	-0.261296	0.448665
FTL	5291.56	7022.05	6072.67	6459.32	6855	7085.18	3468.72	6959.99	4506.98	9692.93	4968.95	8374.94	5191.28	7417.62	6064.94
COL17A1	9.96098	456.659	115.891	26.1787	10.007	544.766	483.612	37.0138	-2.39366	23.48	356.193	17.961	237.629	47.8738	371.187
CHODL	6.76091	18.0218	20.5403	2.9294	5.67204	20.2653	2.1569	2.88835	9.18224	9.64073	1.47386	8.85151	7.17433	6.77698	3.81652
FTO	120.898	166.831	138.463	123.477	109.227	84.0146	42.492	123.07	69.3792	82.0685	32.1496	81.4699	102.727	60.6954	12.4636
DLX1	-3.49082	2.68726	4.86708	3.48355	0.86198	2.42511	6.54741	-1.52695	3.72608	4.48273	0.826799	-2.52241	3.40406	3.1097	-0.153379
DLX2	-5.42963	3.48712	3.47666	-0.646233	-1.85703	2.23114	5.2772	-4.60978	-2.85956	0.619848	7.49484	1.41025	7.48513	-1.28081	2.04302
DLX3	6.66382	20.6343	12.5457	-5.39482	-1.85719	13.489	39.2437	-2.75449	-4.66991	-2.23328	2.99411	2.78026	-1.67811	0.366321	11.391
DLX4	3.38087	-3.84461	-1.31276	0.838859	10.419	7.03135	0.809898	0.773736	1.03476	-1.80425	-0.0533697	-2.53797	-2.44186	-1.82295	-0.387217
DLX5	2.03072	9.64556	2.2271	-0.0153318	-0.0284152	-3.87198	2.53871	-1.85551	1.56278	3.92442	0.156362	2.74754	1.0348	4.66808	-0.623341
DLX6	3.91557	7.36972	-10.6182	2.76975	-4.48761	9.64899	-0.936103	17.327	4.36887	6.26703	11.0965	6.24735	0.592684	5.11566	12.0687
LOC652274	1.14037	3.25208	-5.29784	20.997	21.9327	1.97614	-2.06082	14.9328	5.32051	4.77492	6.3446	7.72867	5.92429	6.25055	5.40273
CORO1A	52.4231	41.0419	101.034	60.2356	97.2995	85.4324	117.423	38.2715	74.4722	41.6005	45.3204	110.711	78.1932	118.281	209.716
LOC652272	6.68358	4.26405	3.49781	8.22972	4.24187	1.42083	-0.620185	19.5169	13.2938	18.4594	10.8322	11.8582	9.90797	13.6715	7.45411
CORO1B	296.044	334.519	255.236	344.904	215.142	492.677	352.029	201.621	225.123	382.71	318.152	408.927	257.217	395.826	398.241
LOC652271	7.19624	4.85001	6.3814	49.4136	20.2715	7.58901	8.48425	25.3477	36.7291	11.8379	11.9031	13.9995	20.6583	14.9299	24.1216
CORO1C	69.9413	108.704	63.7013	60.9811	74.0621	158.549	130.653	114.598	122.197	87.9155	131.456	64.5453	110.862	77.8659	145.328
FUK	123.672	155.743	114.88	166.837	224.336	215.189	289.771	70.1444	164.684	111.86	106.029	158.53	118.107	140.454	78.2479
SLC14A1	3.15348	-0.307588	8.05485	2.00788	2.87319	4.93375	2.3923	7.98972	5.24959	4.39874	5.29557	5.0298	7.1864	8.03927	4.47133
SLC14A2	2.78614	-2.94395	2.37467	2.29219	24.5722	4.61066	2.71749	8.76813	11.4278	11.6036	5.29957	5.47863	9.36727	10.5677	10.3208
FUS	23.7377	57.3254	26.1185	15.8787	17.3353	41.236	82.9565	5.29328	59.8581	33.8351	22.7294	23.5819	18.4605	7.46341	11.599
LOC652265	1.1382	6.0362	5.30121	2.73482	1.97282	1.98137	4.58671	-7.69863	-3.06829	1.22572	-3.06783	0.557952	-1.76893	3.1698	4.59314
FLJ10213	31.4942	50.3762	33.5915	36.5035	20.2665	66.3611	69.0126	10.222	110.133	11.2052	4.56276	18.2824	36.5081	11.3813	21.0152
FUZ	226.354	96.2316	119.7	250.529	190.847	44.2186	145.888	126.384	135.848	152.792	74.0415	150.926	121.57	223.547	69.1841
LOC652264	3.34251	7.83743	6.80089	46.852	8.23118	3.51493	6.4751	0.621092	8.02078	5.19211	1.99209	1.47527	7.82456	5.32075	2.04868
CORO2A	258.884	238.186	211.627	283.481	204.274	346.469	109.986	234.415	345.619	228.872	243.471	307.254	233.495	229.804	179.888
CORO2B	13.0723	5.29882	11.6417	2.26832	52.1799	3.91429	5.42721	21.3076	35.4331	3.91525	15.1989	21.0917	26.8638	50.1494	4.27316
NDC80	18.1077	13.4845	8.22749	3.16963	2.9699	11.9072	8.03268	6.90176	4.64671	10.3337	22.7119	23.1802	23.3718	18.4813	45.3979
LOC652260	3.34241	9.83237	-2.78592	1.39724	-2.93955	6.25562	18.7791	-7.1229	-2.08691	-1.90761	-3.90664	-3.04284	1.99075	0.200716	-5.85876
LOC652259	3.34174	-0.849548	-2.95396	2.73497	9.16352	10.0137	-3.51216	10.0374	3.46852	13.4937	4.2181	5.26983	8.76669	15.0473	18.6839
LOC652258	1.44303	4.85274	-2.73326	-1.18792	-0.54367	-5.07618	2.37077	1.96235	4.27226	4.48997	-1.26072	-3.66842	5.88169	4.01247	-2.12105
SYCN	1.0364	-0.0225075	-6.18297	0.18374	-3.89842	0.454417	10.0354	-3.58898	-1.76862	-0.841815	-0.503479	-0.667317	0.999408	-5.32751	1.85428
LOC652256	3.34161	-2.61867	6.47535	-3.03725	-2.06802	11.4287	6.66008	29.292	23.4884	12.9136	13.1675	7.57866	8.35789	23.9074	21.3738
LOC652290	5.14385	3.25318	11.424	-3.86624	4.24218	10.3069	6.39279	-9.53497	-6.95159	-8.52215	-11.4397	-6.9607	-0.439561	-6.53285	-8.5747
LOC341651	2.37155	-5.32632	-10.2761	8.94976	-1.36321	-7.65445	-5.41543	-3.0524	6.64853	2.4593	3.81001	2.91861	1.35315	10.6669	8.37078
LOC652298	-6.15014	-7.9041	0.231023	-1.17332	2.54539	-8.73695	-5.82012	-1.85304	-1.93264	-3.89897	-4.60473	-6.12618	-2.11301	6.90737	-6.18919
LOC652294	3.91045	3.50048	-0.453929	9.82626	29.3909	-0.450544	10.0126	-0.929773	0.336717	-1.26007	1.85616	3.52138	-4.25159	1.74346	0.641552
CDC73	10.4363	-0.985892	2.76892	-0.67085	-0.0444755	-4.66073	4.94258	8.04152	0.623413	4.66128	-1.88537	0.165434	4.18828	-1.657	9.15238
RLBP1	2.03618	6.36501	-3.93122	-7.53784	-0.265215	9.44581	-0.072453	2.22885	2.74237	3.45846	5.12806	1.94125	6.02822	6.05147	-1.37224
LOC652292	-4.22001	2.07766	-2.05173	21.0195	-4.33062	-0.452632	-2.70565	-5.07247	-3.44835	-2.40778	-2.52942	-0.839135	1.76199	0.362391	-3.06973
IIP45	12.7351	10.0429	17.9952	64.6782	13.5036	23.5593	24.4074	30.7405	26.5129	20.8633	11.7784	19.0379	17.0444	17.9009	34.7711
PRED57	2.78775	9.64501	2.24727	8.33217	2.89899	2.27506	-3.87242	2.07416	-6.38548	-3.88833	3.36711	7.03253	2.53187	-0.505483	-4.86129
COMMD10	78.7829	118.579	86.0352	19.3217	75.9298	63.9459	38.9279	276.957	51.3218	106.08	324.928	105.07	134.056	117.89	158.617
LOC400566	1785.87	550.862	875.546	970.629	1424.5	220.121	1035	832.836	1488.82	1130.43	518.801	1390.38	1192.68	938.01	343.524
LOC652288	-5.34345	-6.41396	-3.08464	-5.84802	1.97453	-1.18483	-9.81503	-4.27216	-4.26161	-1.50482	1.73836	-7.66977	-3.512	-5.33612	-3.46816
LOC652287	1.43833	3.25195	8.3544	-3.86505	4.24425	7.58272	-0.615853	1.64859	10.5365	-0.917303	23.356	-1.85994	1.13917	21.3855	1.37261
LOC652286	1.43801	2.06831	5.47349	15.0664	-0.544623	3.54319	6.38297	14.7679	7.84381	12.2761	9.91757	7.21611	9.13538	8.7388	13.5929
LOC652282	-0.497966	3.25241	-2.75514	-0.026841	2.53595	-6.1835	-4.2406	3.49035	4.28815	7.49936	8.05477	4.93047	3.93429	5.30771	6.23842
LOC389607	-8.52215	-0.0410721	-5.35993	-2.14309	-0.848395	-5.03705	-4.4044	-3.92116	1.00774	-3.46063	-7.67316	1.73745	-6.40915	-3.06736	-3.67525
LOC652281	9.53706	6.14022	19.5955	1.39564	8.23239	6.26958	-1.13885	9.5546	2.77778	4.7583	0.359206	4.97688	10.0609	1.65295	4.97607
DKFZp434I1020	-0.401204	-2.47422	3.75568	-1.34478	23.3985	-3.92741	-1.28516	-1.26231	2.65983	1.90302	0.091657	1.48055	-1.12969	-3.50437	-3.89519
MFRP	-3.86666	-3.47044	2.22858	-4.20554	1.02756	0.209552	1.44184	4.39645	-2.04955	-1.13899	0.821961	-3.90916	0.0728485	-1.40725	-1.21855
SYF2	407.806	458.187	487.809	238.872	238.255	379.105	260.802	361.301	326.881	312.746	494.03	367.752	440.593	459.239	363.383
LOC652278	1.4395	4.84965	2.77298	20.9999	13.0087	9.93836	-0.615439	14.0025	17.9421	7.4689	10.0493	7.92699	10.5787	12.5571	25.651
FXN	10.8222	6.34152	6.31142	8.74631	4.74443	11.3361	17.627	5.06465	8.60695	7.23149	11.708	7.09611	12.3823	1.94149	4.88653
LOC400578	0.104834	12.5485	10.1628	-3.21988	1.67622	13.9854	82.7864	4.35431	-1.51268	5.20006	13.5613	2.80763	13.6659	10.9102	47.5042
SLC5A11	2.0265	4.25517	5.89613	7.10233	1.45911	0.346045	-4.24594	6.78945	-1.42548	7.37592	6.55318	6.04069	1.35254	2.79263	6.90845
SLC5A12	-5.75412	-3.81683	-5.514	-3.79837	1.68716	2.99957	-1.98004	-4.09995	-2.35014	0.538979	-3.31883	-1.49474	-3.7632	-4.26026	-2.38473
SLC5A10	1.5263	3.13566	1.1055	5.50559	-3.60018	0.173904	1.87518	-1.52098	-2.16243	-1.37185	-4.13745	-3.7896	-1.91703	-0.0478854	1.60692
RCHY1	1.65922	13.9365	19.5894	2.70889	9.0272	9.15224	11.4427	3.37175	-1.22815	9.01444	12.5925	11.604	10.2561	6.53634	-1.09787
FSCB	2.03395	-3.93538	-4.91769	4.55671	3.7503	0.458371	7.91329	10.0431	1.86768	3.39277	2.88849	4.06675	1.68411	6.65571	11.2886
FYB	23.8102	25.0042	38.9534	-1.14561	11.1078	20.1593	23.7298	42.5541	20.5213	12.7523	47.1296	70.112	33.7643	54.0148	95.46
EHBP1	191.899	283.279	207.902	177.099	158.639	205.375	157.112	266.957	217.567	275.748	446.521	215.473	246.625	194.718	117.44
CDC42	121.066	99.3705	93.5811	120.359	101.677	80.7741	73.7452	147.873	57.6144	71.8987	115.036	79.935	88.1958	122.968	71.3098
FYN	19.8803	13.2487	23.8191	34.4187	3.73592	16.1827	7.76587	3.57219	9.85244	0.830994	3.1033	19.6139	14.8649	10.4098	24.1741
FSD2	-3.75146	-7.07919	-10.6257	5.13139	1.63794	4.65766	-3.41699	8.03661	11.8478	2.6152	3.45302	4.63708	-0.350825	1.46068	3.50296
FSD1	2.09659	0.31709	1.51297	31.7344	11.5375	-0.331155	4.8291	13.4374	7.78921	8.31731	6.69176	3.84903	5.4993	9.668	5.46602
LOC400581	-3.90077	-1.78026	-5.31918	0.238209	-1.41633	-6.84922	-4.58208	6.56471	8.75484	-1.15156	-3.49133	-2.08661	1.95964	4.60426	1.05776
GADD45GIP1	4.10329	5.49684	4.9535	5.76091	9.14635	-2.94333	10.5379	4.61401	-2.5301	6.0323	-1.19422	4.28331	3.08596	5.50059	9.14327
CDC5L	101.346	98.4122	109.208	23.8321	65.1718	59.8391	36.185	164.281	56.4325	111.74	155.165	139.831	146.783	181.584	169.883
STUB1	375.897	451.122	479.323	431.736	478.459	583.516	389.322	416.243	399.366	401.802	365.717	339.802	262.966	493.891	422.11
FSBP	5.12386	4.37422	1.0024	2.04	13.2898	6.39502	2.72702	8.84479	4.1998	6.35926	8.21721	2.97507	0.822606	4.58019	3.81105
LOC400590	3.45856	3.9161	1.48259	9.5321	1.02457	2.73051	-4.5824	6.81735	11.8325	9.26307	9.14327	2.53659	7.93216	13.0016	9.15458
FLJ46284	6.78274	-2.81753	-0.983267	-6.38137	5.92242	2.91406	23.1948	12.3697	-4.25735	-3.40958	2.69161	4.95602	1.42226	-2.1376	-0.345747
CDC20	542.369	130.756	29.5673	84.8535	142.701	301.262	850.543	239.946	98.2643	356.801	852.674	117.904	165.474	200.576	707.682
CDC23	218.985	335.781	238.104	173.198	160.36	344.24	371.089	228.987	320.514	262.479	375.642	239.946	263.397	246.312	364.29
CDC26	1280.85	817.459	934.647	815.55	998.341	681.442	1475.81	1029.14	908.042	907.554	1085.04	1049.78	1136.95	1219.01	1061.57
CDC27	6.77225	2.05896	0.648802	-2.10031	-2.13456	-6.95711	-0.517565	-0.935393	2.45824	1.00151	0.632494	8.23456	-1.13818	-5.82649	-2.07338
ATP6V1E1	831.739	1160.26	978.1	1340.88	1307.69	1422.14	1787.97	1293.04	1041.75	1471.2	1378.51	1042.74	1010.78	1427.87	1627.47
ATP6V1E2	30.0566	48.7432	56.4347	52.2518	10.6655	24.2872	16.21	78.2903	35.3911	62.9582	34.8321	52.7491	52.5117	81.4877	11.2979
ATP6V1G1	1714.5	2231.02	1963.58	1610.55	1705.58	1565.41	2234.05	2091.13	999.797	2022.04	1695.36	2141.78	1974.8	1931.82	1961.96
ATP6V1G2	5.87217	4.43793	2.86127	-2.03591	2.85764	1.33947	-4.57354	5.25476	2.86136	5.98012	0.045845	-2.10529	4.30762	7.91768	0.083516
CDC40	297.098	390.976	364.837	321.719	218.381	294.003	337.321	247.007	345.465	322.57	344.618	354.756	369.575	303.541	278.123
CDC34	95.8095	100.401	105.555	92.1996	92.4003	162.302	116.762	137.996	93.5193	103.86	62.3541	102.242	63.7998	91.8296	112.421
CDC37	2266.53	2875.62	2430.7	3455.76	3219.66	4383.67	4061.08	3354.76	4108.94	4943.8	3754.69	3313.36	3793.28	3637.79	4427.06
TRIB3	12.0739	6.26061	16.5205	6.68802	14.6589	14.6583	48.2459	10.0588	19.4286	9.14261	8.26073	16.2224	8.4903	6.26262	6.76712
TRIB1	723.053	648.404	579.9	647.293	644.692	1486.96	794.576	631.634	1747.71	872.433	891.307	988.234	1731	448.431	448.925
TRIB2	73.442	112.7	209.165	129.365	158.353	223.454	259.358	90.3602	170.981	153.743	136.367	142.998	152.022	102.351	217.114
ZNF324B	20.9074	6.76133	13.97	-2.01164	0.467345	15.2231	9.15346	2.69328	10.4304	5.89324	-1.37919	6.76847	-2.06942	0.897204	-3.95353
OMA1	252.297	203.076	171.232	127.242	133.42	88.6507	39.6968	153.855	79.7531	93.8712	143.061	158.825	171.591	177.009	104.919
CDKN2AIP	64.5527	51.9792	77.7652	16.5022	37.3249	43.2044	39.4781	94.5167	41.7056	63.3744	88.687	53.0818	92.4092	57.0077	49.8398
ATP6V1C1	31.2035	49.5742	52.9865	44.2818	9.60561	40.9163	51.5381	23.7188	20.4306	44.7316	29.5814	37.3549	34.9505	28.5434	19.4567
ATP6V1C2	19.7378	12.8902	10.8135	46.5666	50.4452	9.86034	13.7512	2.8513	72.2193	33.1214	7.3083	26.1764	22.743	36.5351	2.37003
CDC16	1141.55	831.518	1004.95	1139.18	1086.97	635.734	946.766	862.131	1018.37	893.277	704.85	1109.66	1016.21	1366.41	714.216
ZNF322B	0.106467	13.2367	8.83716	8.74256	3.08934	-2.5185	8.29158	4.37882	-1.25016	2.86067	1.64796	-4.61535	1.75406	-0.314609	-0.583583
ZNF322A	15.9395	15.3345	14.5395	3.16036	14.7952	15.4991	31.9972	15.4252	13.0086	7.55081	10.0524	19.2603	18.3511	6.70911	3.93772
SLC2A4RG	15.4098	34.0993	23.7546	7.21153	12.8071	38.5523	28.7791	17.7419	31.7521	19.8825	40.3426	24.2818	20.7352	41.9578	45.3939
VMD2L3	-2.73928	1.32214	-9.80489	-1.22884	9.82028	-4.40548	-4.27594	3.4503	-2.40506	0.462601	-1.91504	7.37029	1.14072	2.27682	-0.474128
CRTAC1	3.07044	5.67055	2.89264	1.98761	-6.22414	4.23206	1.86023	-1.26475	-8.61111	0.215353	10.9123	-2.32833	-0.836965	6.38206	-2.03808
DFNB31	68.8711	32.7078	49.1166	125.34	152.301	34.0253	38.2831	58.7097	97.4945	54.2961	28.7858	54.8684	28.3969	37.2993	42.7237
GAA	32.5616	54.7682	69.4834	55.6234	70.2067	147.241	111.302	41.3376	104.304	70.4536	34.3139	36.3565	50.6056	32.6366	52.5781
FSHB	2.50312	0.538572	-1.38855	2.48947	-2.31642	-6.95839	7.55737	-2.6575	-0.058594	-3.30792	2.55973	6.98979	-0.581851	-0.534427	-0.0456325
SYN3	1.1734	-0.744798	-7.23615	-2.35281	-4.33412	0.64918	-6.79709	-2.90713	2.35787	-1.50619	-3.57346	-0.58136	-0.181051	2.89425	0.263629
SYN2	12.799	15.8394	5.52813	-1.10494	-2.18772	6.54058	6.58037	0.380584	0.89468	1.35197	-1.28577	1.78242	-1.29319	5.52778	0.47213
SYN1	8.18394	9.96034	4.60038	3.19788	0.419593	9.5532	5.09176	6.37943	8.63668	7.27116	7.4357	4.84212	2.28247	0.0907524	0.51574
GAK	194.825	228.729	175.992	178.528	219.941	301.406	432.535	157.886	365.259	469.6	246.765	316.481	249.128	205.856	177.455
GAL	3.64493	-8.53894	-10.6088	-3.91245	1.55487	-2.93693	3.07072	7.37863	1.46389	1.72636	-1.41644	-2.14915	-0.244012	-1.39681	5.13605
GAN	0.62206	13.2825	5.32296	2.07704	1.75527	-2.22728	13.1963	-0.0587692	0.211974	1.34892	-1.77963	5.87924	7.7516	2.03271	2.37393
FSHR	-1.98101	-1.59798	-0.016335	6.70002	2.69331	-3.6299	-1.52018	3.38558	3.72837	-2.70313	8.25658	0.16433	3.48716	0.0423555	-0.404212
DMC1	247.264	377.513	399.139	921.506	442.992	649.881	1036.71	330.534	2046.8	337.999	192.566	321.02	895.781	254.927	624.173
LOC255130	4.64135	5.19747	10.3187	4.2079	2.9918	-7.637	-1.24099	15.5239	0.215573	5.89709	4.49273	-0.150816	4.56244	8.85852	10.9922
GBA	203.82	196.472	224.847	270.339	262.465	297.049	138.363	135.234	221.897	220.275	148.603	244.618	178.994	89.482	107.349
GBL	81.1848	99.1834	81.8553	103.606	42.8535	181.667	174.321	102.024	101.446	65.7668	97.6626	60.321	53.143	114.88	157.135
DFNB59	5.54611	7.97193	12.7379	1.74852	-2.39527	3.1693	12.4056	0.781532	2.12207	10.0818	5.10031	3.25551	8.61199	3.01706	-0.314573
NFIL3	29.0294	21.8479	18.5699	-1.05882	3.91409	20.8282	16.3503	-6.10839	11.8791	14.1235	-1.42165	26.731	8.45679	-1.77478	15.511
ZNF585B	-1.28455	5.59276	0.342612	-9.07915	6.3414	1.79955	0.184914	-2.84643	0.0070886	-3.51099	0.240522	-1.62255	1.12223	2.88442	1.44607
ATP6V1G3	0.54331	2.00862	3.2295	1.90274	8.28299	-0.451072	-2.50202	4.10411	5.22127	5.08499	6.5359	4.22439	5.86009	10.5598	7.14558
ZNF585A	25.9943	26.238	24.5307	28.4102	5.25127	22.9041	17.2239	9.39148	23.0208	18.8631	30.9933	30.5229	28.1937	43.514	23.4209
OFCC1	-0.224521	1.78208	1.02614	13.3958	7.6222	2.89836	-0.147274	-7.67618	-5.64077	-6.9607	-6.84991	1.36277	-4.30481	-2.52375	-6.41143
HYPB	-6.18216	6.56742	-2.07638	0.191489	23.9237	-7.22962	-1.24401	7.58507	14.1099	7.58442	7.60371	1.37001	5.84318	4.6841	6.14963
GCA	293.339	271.16	386.503	332.452	217.979	147.755	146.671	303.529	232.391	304.119	282.591	313.26	265.473	370.895	210.322
GCG	-2.11027	7.21973	2.68547	-3.91395	1.77413	2.96783	0.65238	3.64847	7.20108	10.3285	4.58603	5.93284	9.83668	6.65357	2.71543
GCK	1.09636	1.09634	-1.73985	3.56372	0.440915	-0.442752	-0.392077	-4.35753	-0.301328	-1.11479	-3.09854	-2.18612	-3.21035	1.09976	-0.20571
HYPK	596.647	635.316	755.492	1559.24	1052.89	936.401	1536.52	467.728	2847.53	574.062	267.177	392.699	1142.92	370.333	792.193
CFHR2	4.02083	5.74822	4.38738	21.4921	-5.45054	1.45297	-4.57365	-3.41597	10.8358	-0.23714	1.03959	2.73677	4.66496	8.85818	0.335785
CFHR1	-5.84362	0.25012	-0.661836	-3.46867	-9.67976	-9.91163	-4.57276	-5.1343	3.93472	-1.67689	-5.54546	-4.10667	-2.85441	-2.08556	-9.67284
CFHR4	1.13356	-7.6848	-0.0613403	7.3685	-5.45019	-2.76362	-2.61007	0.14663	-0.454255	1.05706	-2.4091	0.586813	-6.41813	2.46434	-1.86553
CFHR3	-1.08423	0.847564	3.34964	-1.63397	4.31046	-6.6374	-2.74125	2.81295	0.150416	-1.0355	-3.08455	-3.25789	-0.047245	0.821737	0.135622
CFHR5	-0.0229095	10.4592	7.83944	-2.41878	-2.80435	3.94049	-2.60571	-11.4895	-6.13177	-1.91817	-0.544958	-3.5499	-5.73107	-7.88858	-1.26689
SRP19	294.213	176.278	212.923	43.7975	169.503	182.888	175.258	291.953	94.2966	177.661	262.256	155.564	171.268	255.314	262.218
SYS1	345.283	210.336	370.273	402.647	318.176	153.56	101.542	391.609	285.532	211.457	146.306	299.442	257.903	296.906	165.298
PCDH11Y	-5.88889	-1.92967	0.432089	-1.5983	-0.837276	-5.08078	3.69841	-4.30211	-2.29335	-2.73399	0.582483	-1.92761	-1.6545	-3.54498	-1.52184
AMHR2	3.54444	0.230922	5.29734	32.2519	3.55234	-1.88352	2.97421	3.64547	4.68684	10.2224	-3.08975	10.921	5.50971	-2.70976	2.7297
GDA	6.50718	-0.0590895	2.43513	9.17973	2.64256	7.13672	-4.39371	1.97921	-0.989028	-0.127436	-1.71137	6.6906	0.717596	-2.36609	-0.361784
RPP30	9.68604	7.16402	-5.58003	-6.45977	-4.30731	-2.93734	4.16813	-0.57296	1.81043	-0.947605	5.24791	4.82972	0.339093	1.7405	0.448579
PCDH11X	4.22861	-1.96027	-0.465504	0.936517	-0.51456	-2.152	-0.162539	6.04608	2.44585	4.14635	1.7685	2.78076	4.1097	4.15386	6.63314
SRP14	2614.36	2573.89	2290.48	1322.85	2266.53	1260.24	360.546	1464.06	609.093	1151.89	1918.88	1928.4	1737.15	1558.61	1053.46
LOC221710	20.9825	21.3575	23.382	17.6682	25.3813	30.637	37.9529	52.0764	29.5743	32.4045	46.7637	28.7471	28.2585	59.1817	73.9008
RPP38	50.5943	34.6929	51.6253	49.4478	64.9588	37.6623	17.7266	63.9909	17.1126	48.3503	42.6575	51.343	65.6429	62.3985	40.9812
GEM	9.12672	6.1019	6.59305	3.79732	-1.50777	3.70054	-0.145076	3.0292	1.87571	-0.947211	-0.585905	2.39868	0.942512	8.57343	3.91703
SPOCD1	1.03108	5.89644	1.39322	-3.09802	-1.8631	6.35984	34.1313	-0.349894	5.30356	1.06208	4.19591	5.11644	6.14452	26.009	-2.09691
RPP21	767.294	1058.65	762.583	753.304	883.922	1537.44	1042.45	1101.4	758.99	876.936	1721.99	754.452	1030.33	1237.06	1767.95
FETUB	0.615909	6.14162	7.00784	2.87979	-4.23326	6.37983	1.55295	-6.13964	-4.28817	-0.835175	3.17812	-3.85907	-2.75044	-5.63642	-7.20567
RPP25	37.2968	57.4292	29.1079	21.0007	11.0616	97.1351	101.708	27.8937	20.9825	33.2448	34.2171	15.3133	17.2285	24.5023	99.7395
SYCE1	2.62452	-0.403803	0.890559	5.83856	3.74891	-1.49819	-2.12565	2.35714	1.95809	-1.73423	2.90088	0.50068	-2.26409	1.59839	4.56124
LOC390683	15.1545	2.24567	3.46578	-3.90733	4.56308	0.595051	13.514	-3.48117	-0.530868	-0.24713	-6.03101	-2.95945	-2.1044	-5.34072	-5.41502
LOC390688	1.38787	-5.35301	-2.00344	49.9185	-4.27418	-4.3134	5.87004	0.195035	5.7574	-0.455842	4.57598	-1.68237	5.93929	3.1705	-1.3548
SYT5	10.3015	-0.478104	6.78971	-5.09569	14.5769	3.46211	15.5218	1.39925	1.7288	4.76748	6.05434	7.69774	0.0660662	1.98077	0.176299
SYT4	9.05206	-0.47663	6.35504	-3.42779	-3.90241	0.447039	-5.3833	13.0197	24.3097	0.741301	0.179199	3.65018	1.98546	2.74124	2.00619
MGAM	2.61632	5.51052	-3.09177	3.18523	-1.55268	1.07135	5.97146	-0.813444	-3.14932	-2.58337	-8.42528	-1.90647	-0.189083	-7.69057	-3.3022
SYT3	-3.43414	-2.40589	-1.50257	-5.09505	7.57153	8.8402	-2.86738	-7.20305	-3.87525	1.39099	-1.19805	8.57831	9.13379	-1.25812	-5.05347
SYT2	-7.67469	5.90621	-5.74629	-3.4281	2.97764	-9.23912	-1.24332	-9.00145	-6.54071	-14.877	-9.42751	-0.836354	-6.19587	-8.38869	-10.4676
FLJ46210	6.75942	-2.05144	0.373172	-3.903	-2.04585	-0.250883	-2.86326	-7.65402	-3.41301	-2.85922	-1.85322	-6.29084	-3.91975	1.01744	-3.90752
SYT1	6.03898	9.03905	9.91087	1.0229	29.683	0.929712	-6.1446	0.333401	6.13033	2.06602	-0.0178744	-3.44875	12.2051	-0.646663	2.28031
RPP40	506.106	252.2	437.197	347.887	330.469	305.984	530.412	568.657	307.722	538.373	485.704	383.998	461.471	756.528	491.994
GGH	120.777	183.405	115.138	67.2274	47.9013	51.992	54.2271	219.891	75.275	95.1529	270.186	114.794	197.754	185.414	186.271
SYT9	-2.42442	8.95777	1.13842	-2.79682	7.57016	2.73462	4.76217	10.2215	0.25695	10.4336	5.16143	6.66182	10.4194	8.36812	10.3416
SYT8	12.999	14.6487	17.2996	20.821	14.5765	46.6735	23.3843	27.2168	16.3246	99.0543	23.3537	16.2013	20.0102	57.8368	36.7219
SYT7	5.93847	6.93402	5.09431	7.13606	6.79508	5.89335	10.2251	6.02774	5.24072	5.60044	7.05018	4.21985	5.78646	4.15642	2.63672
MANBAL	455.992	498.639	491.085	518.897	514.674	608.292	512.95	482.197	441.949	591.125	487.173	475.743	422.229	546.282	645.773
GGN	0.260561	11.608	2.15285	5.85839	20.9999	-0.836965	-0.747947	8.46748	-2.61185	2.45681	6.65383	1.55563	1.73768	5.29857	2.53871
SYT6	1.03763	-9.90955	6.35164	10.0211	-3.90263	-6.37818	-4.10159	-4.60999	-1.2203	5.87461	-3.42369	-2.52989	2.73237	2.025	-5.42176
GH2	-1.85016	-2.85378	0.699846	13.3858	3.27387	-0.607215	0.255205	-1.29212	0.75044	1.63655	-0.731049	-2.58572	-0.118283	-1.11533	-2.13359
GH1	5.28828	-1.6571	-0.0487715	9.667	4.44871	-3.13302	-2.69776	-3.49968	1.99882	0.879729	0.146475	-0.191006	1.01512	1.37602	-0.518393
FLJ22269	4.77989	-5.32161	0.360341	-2.80592	-8.51247	5.84852	10.4499	-5.63081	-6.97667	-1.24059	1.73485	-12.8472	-7.64736	-8.44214	-6.03008
PSCD2	55.7031	34.7997	34.4356	13.5993	13.3147	36.5165	56.9589	18.9099	22.8992	37.1492	30.1829	44.8178	29.3498	41.7713	49.946
LOC642804	-0.0181969	-2.60458	7.83795	-3.0565	-6.19368	-3.10829	2.45233	-3.52942	-1.76036	3.25678	-2.14425	-0.958298	-2.7785	1.76828	5.1645
PSCD3	26.3073	13.6851	9.69486	-4.4146	9.92989	21.1512	8.40476	6.36156	13.6896	6.33168	4.33047	11.7887	10.5728	14.2835	3.74735
PSCD1	394.667	509.968	493.309	486.329	469.724	619.35	461.327	477.799	704.432	608.978	503.163	550.954	594.766	513.29	564.422
LOC642809	8.76881	6.78729	6.99977	5.88386	9.44074	-0.353236	6.81904	1.34814	2.15475	-1.1821	0.156978	2.76461	-0.925006	-0.836426	3.50851
LOC642808	4.76378	-1.68375	-2.2268	5.8837	-0.957649	-1.58031	0.338577	3.34128	-1.24897	-2.6212	1.0511	-2.24871	3.33077	4.94546	-1.87225
DMKN	328.081	178.241	297.087	477.923	501.949	105.764	174.68	339.953	423.215	290.836	117.53	216.263	182.576	412.894	143.331
GHR	14.2026	51.0579	45.4328	-6.52852	4.38242	16.9393	43.9156	25.9866	42.575	9.64005	58.4744	4.59908	40.2518	2.79191	17.6602
SGOL2	31.6483	5.82614	18.2203	-1.42811	2.60616	4.71713	0.881672	25.0472	8.35711	15.8689	49.0787	19.2154	16.1088	18.1481	11.8946
SGOL1	8.49496	2.97243	3.04044	1.47983	5.50131	0.782627	-1.37911	9.56214	9.46025	9.88149	21.4982	6.94229	12.0622	7.20626	13.5693
PAP2D	0.517449	-0.487388	-6.15739	-0.847876	2.74696	-1.2037	-0.528554	1.90414	1.03952	-2.95578	0.305836	1.45994	-5.40742	-1.21823	-4.09697
PSCD4	13.4775	31.1763	26.3272	15.8633	9.66178	40.609	191.39	9.17942	91.1622	27.7173	29.7101	83.1551	73.173	111.084	157.151
TGIF1	131.405	129.186	119.341	105.858	118.47	91.7263	38.4623	131.039	34.9143	76.091	92.0407	86.857	85.4243	95.1547	102.241
FLJ46230	21.0062	20.3593	21.92	8.48382	-5.38518	-2.09337	10.5736	11.3857	49.6121	18.5691	7.21394	32.1758	15.0191	12.2869	5.51685
TGIF2	22.3149	31.9522	47.9933	24.7759	-0.517754	69.4609	63.3461	40.609	48.5453	25.0775	42.8638	26.009	29.2183	26.557	62.468
GIF	6.35427	13.1699	-7.28117	-4.65326	0.735354	-0.24054	-5.29956	-4.6269	-2.83903	-6.40915	-8.59578	-9.00328	-7.53135	-6.16033	-0.219713
GIP	-3.05417	-2.12585	-3.33872	-0.636691	8.96923	-0.237599	-7.44737	3.57474	-4.57391	-1.35921	-0.529722	-3.33574	1.44227	-0.0495237	-1.91283
ATP6V1B2	681.991	801.187	719.268	660.863	570.455	1052.68	707.129	681.642	772.146	859.342	894.304	882.184	687.693	598.153	895.975
ATP6V1B1	152.387	328.295	82.0717	157.662	177.017	147.963	105.369	156.409	420.632	117.637	325.25	144.745	123.254	219.707	56.513
FLJ46266	4552.85	2117.46	4075.13	4476.24	4352.62	423.589	1851.79	5208.03	2571.13	4458.95	2068.24	3972.58	3883.94	4625.99	1131.72
REP15	-2.01701	8.76566	5.94583	-5.13862	-7.91727	6.78328	-1.77838	-6.86047	2.99835	-2.33658	-5.72453	-6.13565	-3.74692	-2.71015	0.454869
LOC642821	4.23642	-3.06295	3.16566	-9.63684	1.63427	9.19128	-0.539504	1.38645	-0.933513	0.073127	4.67914	3.50552	-3.45229	0.203015	0.44686
LOC642820	5.93274	17.2272	-2.07814	2.91683	5.28691	11.8478	2.74092	6.26767	7.01307	1.63703	7.37109	10.3163	4.11533	14.6672	3.54813
GK2	54.953	39.5819	28.0131	2.73263	37.3045	49.3028	27.9271	0.365547	32.928	12.9908	13.4987	31.4637	41.2463	22.5477	43.8082
GK5	39.6681	43.6967	37.5175	24.4913	90.1339	50.8156	43.7895	7.02092	74.0034	51.0439	46.8474	79.7292	69.3792	12.4599	20.1058
SPOCK2	59.0996	56.5986	177.527	182.023	98.3992	75.958	74.7686	76.412	175.926	50.3796	90.3684	389.095	119.518	76.5265	114.586
SPOCK3	-2.81512	10.5498	1.15091	-1.85428	-5.94766	2.76378	-6.5181	-0.969126	-4.69246	-2.03305	-3.08237	-3.4905	-3.33853	-4.48433	-8.703
SPOCK1	39.7682	148.643	94.4886	14.0235	92.8881	59.6431	44.6895	47.5428	55.741	100.018	57.645	22.8162	35.2004	31.9638	42.8843
LOC162993	7.01827	-0.0192492	1.64087	4.19015	-3.66842	7.61595	3.55263	15.8457	6.56359	3.50195	7.85054	2.69321	11.8644	10.0475	8.03692
[truncated: 23,160 more rows]
