# Supplementary material for: Genes associated with situs inversus in patients with primary ciliary dyskinesia are identified by the weighted gene correlation network analysis
Source: Research Square preprint supplement (doi:10.21203/rs.3.rs-1550476/v1), 2022-04-18
Supplement: Supplementary file 4 [file f6b9d53e7745f439a59f2188.xlsx]

## Sheet: wgcna_module
Gene	dynamicModule	mergeModule
HTR6	green	green
BBX	purple	orangered4
DHDH	orange	orange
BCR	darkorange2	green
LOC402715	yellow	paleturquoise
TARSL2	plum1	plum1
GTF2IRD2B	greenyellow	coral3
FLJ22662	lightsteelblue	antiquewhite2
GTF2IRD2P	navajowhite1	navajowhite1
DHFR	skyblue4	paleturquoise
STRN	darkgreen	darkgreen
FLJ20021	lightcyan1	antiquewhite2
BGN	midnightblue	midnightblue
LOC642432	tan	paleturquoise
STX6	darkolivegreen	orangered4
STX5	salmon	coral3
STX4	violet	antiquewhite2
STX3	ivory	antiquewhite2
STX2	grey60	midnightblue
BID	orangered3	mediumorchid
SPDEF	yellow4	navajowhite1
MBD3	darkturquoise	midnightblue
MBD4	turquoise	turquoise
MBD6	lightslateblue	turquoise
BIK	white	floralwhite
MBD1	lightsteelblue	antiquewhite2
PRKRIR	black	mediumorchid
FBXO28	navajowhite1	navajowhite1
FBXO21	darkgrey	coral3
FBXO22	orangered4	orangered4
LOC642452	sienna3	paleturquoise
FNTA	salmon	coral3
FNTB	plum	paleturquoise
FBXO18	lightcyan1	antiquewhite2
LOC284988	thistle3	paleturquoise
STX8	magenta	coral3
FBXO16	lightpink3	mediumorchid
STX7	plum	paleturquoise
FBXO15	brown	mediumorchid
FBXO11	lightyellow	midnightblue
LOC642439	sienna3	paleturquoise
MINPP1	darkgrey	coral3
BLK	grey	grey
BLM	floralwhite	floralwhite
IREB2	skyblue3	coral3
FBXO46	darkorange2	green
FBXO42	ivory	antiquewhite2
MBIP	antiquewhite4	coral3
LOC400145	darkgreen	darkgreen
FBXO38	plum3	darkseagreen4
FBXO36	ivory	antiquewhite2
FBXO34	turquoise	turquoise
FBXO32	darkolivegreen	orangered4
FBXO33	lightyellow	midnightblue
FBXO30	maroon	coral3
FAM90A1	lightblue4	lightblue4
FBXO31	turquoise	turquoise
SEDLP	mediumorchid	mediumorchid
LOC642489	green	green
HTR2B	lightpink3	mediumorchid
PPWD1	salmon	coral3
HTR2A	purple	orangered4
BOK	darkturquoise	midnightblue
VPS13C	turquoise	turquoise
DHPS	red	orangered4
VPS13A	purple	orangered4
RABGGTB	greenyellow	coral3
RABGGTA	darkseagreen4	darkseagreen4
C1S	saddlebrown	midnightblue
C1R	green	green
SLC36A4	antiquewhite2	antiquewhite2
GPKOW	pink	darkgreen
BRE	darkorange	darkorange
IL2RB	grey	grey
LGALS4	grey	grey
HSPC105	mediumpurple2	mediumpurple2
LGALS3	greenyellow	coral3
LGALS1	honeydew	midnightblue
BSG	lightpink4	green
LGALS9	lavenderblush3	midnightblue
LGALS8	plum2	coral3
LGALS7	grey60	midnightblue
BTC	yellowgreen	mediumorchid
CFDP1	mediumpurple3	antiquewhite2
BTD	grey	grey
CRISPLD1	brown	mediumorchid
CRISPLD2	midnightblue	midnightblue
SUB1	thistle3	paleturquoise
BTK	violet	antiquewhite2
DHX8	lightcyan1	antiquewhite2
RACGAP1	violet	antiquewhite2
BBS2	blue	mediumorchid
BBS1	black	mediumorchid
XBP1	lightgreen	midnightblue
SLC10A7	bisque4	orangered4
LOC727848	darkmagenta	coral3
SPDYC	green	green
SLC10A3	midnightblue	midnightblue
MC1R	turquoise	turquoise
BBS9	blue	mediumorchid
BBS7	skyblue	mediumorchid
LOC727825	mediumpurple2	mediumpurple2
BBS5	blue	mediumorchid
BBS4	skyblue	mediumorchid
LOC727820	darkolivegreen	orangered4
ZHX2	lightcyan1	antiquewhite2
ZHX3	darkgreen	darkgreen
CACYBP	purple	orangered4
RNF144B	darkmagenta	coral3
TAX1BP1	skyblue	mediumorchid
TAX1BP3	floralwhite	floralwhite
PEX16	coral2	antiquewhite2
PEX19	thistle1	floralwhite
PEX13	magenta	coral3
PEX14	black	mediumorchid
INPPL1	lightslateblue	turquoise
LOC91561	lavenderblush2	midnightblue
IGF1R	orange	orange
ENPP4	grey60	midnightblue
ENPP3	lightblue4	lightblue4
ENPP5	black	mediumorchid
HSPC171	pink4	midnightblue
DHDDS	lightgreen	midnightblue
HTRA1	saddlebrown	midnightblue
DAPP1	turquoise	turquoise
HTRA2	honeydew1	midnightblue
IGF2R	magenta4	antiquewhite2
HSPC152	cyan	coral3
HSPC159	ivory	antiquewhite2
CA2	antiquewhite4	coral3
CA4	lightcoral	mediumorchid
CA9	mediumpurple3	antiquewhite2
LOC389286	pink	darkgreen
TMEM189-UBE2V1	purple	orangered4
CA8	tan	paleturquoise
ATP6AP1	brown2	brown2
ATP6AP2	purple	orangered4
CAD	palevioletred2	midnightblue
CAT	red	orangered4
SHANK3	midnightblue	midnightblue
SHANK2	orangered3	mediumorchid
LOC389293	skyblue4	paleturquoise
DAPL1	skyblue	mediumorchid
C2orf7	orange	orange
CBL	green	green
SV2B	firebrick4	firebrick4
CBS	grey	grey
SUOX	pink	darkgreen
CD2	thistle1	floralwhite
CCS	darkturquoise	midnightblue
CD4	lightblue4	lightblue4
CD6	thistle1	floralwhite
CD5	tan	paleturquoise
CD7	thistle1	floralwhite
CD9	bisque4	orangered4
HSPC111	violet	antiquewhite2
CDA	lightcyan	floralwhite
CLEC11A	yellow	paleturquoise
CEL	grey60	midnightblue
NUP93	brown	mediumorchid
BCAM	grey	grey
HECW2	lightpink4	green
SRFBP1	yellow4	navajowhite1
CFB	lightblue4	lightblue4
CFD	coral	coral
CFH	mediumpurple4	orangered4
CFI	paleturquoise	paleturquoise
LOC642502	skyblue4	paleturquoise
CFP	ivory	antiquewhite2
LOC642505	tan	paleturquoise
NUP85	honeydew	midnightblue
NUP88	floralwhite	floralwhite
C3orf19	black	mediumorchid
C3orf17	grey60	midnightblue
C3orf10	magenta	coral3
CGN	skyblue	mediumorchid
C3orf14	magenta	coral3
C3orf15	yellowgreen	mediumorchid
MCAT	palevioletred3	orangered4
MOCS2	salmon	coral3
MOCS3	thistle3	paleturquoise
CHM	darkmagenta	coral3
CHP	darkolivegreen	orangered4
MCEE	skyblue3	coral3
PJCG6	darkgrey	coral3
LOC642530	sienna3	paleturquoise
RRP12	antiquewhite4	coral3
CIC	midnightblue	midnightblue
RRP15	violet	antiquewhite2
EDARADD	turquoise	turquoise
CIR	brown	mediumorchid
LOC642520	green	green
CKB	lightcoral	mediumorchid
PAIP2	darkolivegreen2	midnightblue
CKM	mediumpurple1	mediumpurple1
MOCOS	lightcyan	floralwhite
RRP1B	palevioletred3	orangered4
HIPK2	navajowhite1	navajowhite1
PIP3-E	darkgreen	darkgreen
FOSB	mediumpurple1	mediumpurple1
OIP5	floralwhite	floralwhite
DIO1	brown	mediumorchid
DIO2	ivory	antiquewhite2
LOC642559	darkgrey	coral3
MTNR1A	grey	grey
CNO	mediumorchid	mediumorchid
LOC402677	yellow	paleturquoise
CD300LF	lightcyan1	antiquewhite2
MCL1	pink	darkgreen
LOC400027	thistle3	paleturquoise
BCL9	yellow3	mediumorchid
BCL6	mediumorchid	mediumorchid
CPD	orange	orange
BCL3	darkolivegreen2	midnightblue
BCL2	grey	grey
CPE	grey	grey
LOC402694	salmon2	floralwhite
LOC402693	yellow	paleturquoise
CPM	darkgreen	darkgreen
CPO	green	green
MCM7	grey60	midnightblue
COL14A1	tan	paleturquoise
MCM8	turquoise	turquoise
GGPS1	turquoise	turquoise
MCM3	floralwhite	floralwhite
MCM4	lavenderblush3	midnightblue
MCM5	lavenderblush3	midnightblue
MCM6	violet	antiquewhite2
CRK	honeydew1	midnightblue
MCM2	lightgreen	midnightblue
CRP	darkseagreen4	darkseagreen4
LOC402635	indianred3	indianred3
STOX2	skyblue3	coral3
CSK	coral	coral
STOX1	blue	mediumorchid
SLC35A2	skyblue	mediumorchid
SLC35A1	lightyellow	midnightblue
SLC35A4	navajowhite1	navajowhite1
SLC35A3	grey60	midnightblue
LOC402644	plum2	coral3
KBTBD11	black	mediumorchid
KBTBD10	darkseagreen4	darkseagreen4
ASXL1	maroon	coral3
CTH	blue	mediumorchid
ASXL2	orange	orange
BCOR	white	floralwhite
SLC35B3	lightsteelblue1	mediumorchid
SLC35B2	grey	grey
IL1RN	lightcyan	floralwhite
SLC35B4	saddlebrown	midnightblue
SLC35B1	turquoise	turquoise
LOC727987	yellow4	navajowhite1
ARFIP2	green	green
ARFIP1	red	orangered4
SLC35A5	red	orangered4
IL1R1	sienna4	firebrick4
IL1R2	darkolivegreen4	darkolivegreen4
SLC35C2	lightgreen	midnightblue
SLC35C1	lavenderblush3	midnightblue
IL23A	skyblue4	paleturquoise
SH2D2A	paleturquoise	paleturquoise
SLC35D2	darkturquoise	midnightblue
SLC35E1	turquoise	turquoise
SLC35E3	lightyellow	midnightblue
SH2D1A	turquoise	turquoise
LOC221442	yellowgreen	mediumorchid
LOC389199	firebrick4	firebrick4
SLC35F2	mediumpurple4	orangered4
SLC35F5	cyan	coral3
SIPA1L2	brown	mediumorchid
SIPA1L3	maroon	coral3
DKFZp686I15217	firebrick4	firebrick4
GLTSCR2	grey60	midnightblue
GLTSCR1	steelblue	midnightblue
TCEAL8	salmon2	floralwhite
TCEAL4	black	mediumorchid
TCEAL3	plum1	plum1
TCEAL2	darkred	antiquewhite2
TCEAL1	lightcyan1	antiquewhite2
LOC727922	darkgreen	darkgreen
SVIL	black	mediumorchid
SPCS3	plum2	coral3
SPCS2	bisque4	orangered4
SPCS1	coral	coral
QPCT	cyan	coral3
NUPL2	skyblue3	coral3
SIPA1	darkred	antiquewhite2
LOC389118	darkgrey	coral3
C3orf64	red	orangered4
C3orf68	coral1	coral3
C3orf62	honeydew1	midnightblue
C3orf60	skyblue1	mediumorchid
SPECC1L	brown4	turquoise
TIMELESS	floralwhite	floralwhite
NUPR1	black	mediumorchid
CLEC16A	brown2	brown2
CAMSAP1	darkorange	darkorange
PNPT1	turquoise	turquoise
DAK	pink	darkgreen
DAP	grey	grey
SKIV2L	salmon	coral3
C3orf28	greenyellow	coral3
C3orf21	thistle2	antiquewhite2
C3orf22	navajowhite1	navajowhite1
CLEC14A	saddlebrown	midnightblue
DBI	coral	coral
DBH	coral3	coral3
C3orf25	black	mediumorchid
C3orf26	plum2	coral3
DC2	darkmagenta	coral3
DBP	honeydew1	midnightblue
DBT	lightsteelblue	antiquewhite2
HSPC268	turquoise	turquoise
C3orf38	cyan	coral3
C3orf39	black	mediumorchid
C3orf32	darkslateblue	green
DCI	darkturquoise	midnightblue
C3orf31	darkgrey	coral3
DCK	skyblue3	coral3
C3orf37	darkturquoise	midnightblue
C3orf34	turquoise	turquoise
DCN	darkolivegreen4	darkolivegreen4
DNASE2	brown2	brown2
DDC	grey	grey
LOC389137	salmon4	antiquewhite2
C3orf44	blue	mediumorchid
DDT	white	floralwhite
SNORA10	pink	darkgreen
LOC389142	yellow	paleturquoise
C3orf54	blue	mediumorchid
C3orf52	darkgrey	coral3
DEK	plum2	coral3
C3orf58	honeydew1	midnightblue
C3orf59	darkred	antiquewhite2
MDC1	turquoise	turquoise
LOC341457	bisque4	orangered4
SNORA33	green	green
SNORA25	thistle2	antiquewhite2
CGGBP1	darkmagenta	coral3
SNORA62	green	green
FPR1	maroon	coral3
FPR3	lightcyan	floralwhite
C2	palevioletred2	midnightblue
DYNC2LI1	brown	mediumorchid
C3	lightblue4	lightblue4
C5	turquoise	turquoise
C6	lightcoral	mediumorchid
LOC400304	turquoise	turquoise
CP	red	orangered4
CS	brown	mediumorchid
LRSAM1	lightsteelblue	antiquewhite2
LOC389435	darkorange	darkorange
RPLP1	salmon2	floralwhite
RPLP0	salmon	coral3
ECSIT	lavenderblush2	midnightblue
SNORA7B	orangered3	mediumorchid
RPLP2	tan	paleturquoise
SNORA70	darkorange2	green
ACTL6A	salmon	coral3
SIRT4	lightyellow	midnightblue
SIRT5	thistle3	paleturquoise
SIRT7	midnightblue	midnightblue
F3	skyblue4	paleturquoise
SIRT1	grey	grey
F5	palevioletred3	orangered4
F9	skyblue4	paleturquoise
BDH1	black	mediumorchid
CDC42EP5	white	floralwhite
CDC42EP4	brown	mediumorchid
CDC42EP3	tan	paleturquoise
CDC42EP2	sienna3	paleturquoise
DLD	magenta4	antiquewhite2
SNORA64	orangered4	orangered4
FH	mediumpurple3	antiquewhite2
LOC644844	tan	paleturquoise
CCNDBP1	lightgreen	midnightblue
HLA-DMA	skyblue2	antiquewhite2
HLA-DMB	skyblue2	antiquewhite2
LOC644852	turquoise	turquoise
CSMD1	skyblue	mediumorchid
GK	lightsteelblue1	mediumorchid
MDH1	cyan	coral3
MDH2	darkred	antiquewhite2
LOC644836	tan	paleturquoise
TTLL7	plum	paleturquoise
TTLL6	indianred4	mediumorchid
TTLL5	darkorange	darkorange
TTLL4	navajowhite1	navajowhite1
TTLL3	yellow3	mediumorchid
LOC644841	paleturquoise	paleturquoise
TTLL1	orangered3	mediumorchid
TTLL9	mediumorchid	mediumorchid
LOC644869	coral1	coral3
DCAMKL3	tan	paleturquoise
LOC642210	salmon	coral3
LOC642212	skyblue4	paleturquoise
HLA-DOA	lightblue4	lightblue4
IK	blue	mediumorchid
VPS33A	mediumpurple2	mediumpurple2
VPS33B	navajowhite1	navajowhite1
LOC644856	paleturquoise	paleturquoise
LOC644863	red	orangered4
NSMAF	brown	mediumorchid
DPT	saddlebrown	midnightblue
LOC644889	midnightblue	midnightblue
LOC642233	paleturquoise	paleturquoise
DR1	plum2	coral3
KY	pink	darkgreen
ZC3HC1	green	green
HLA-DRA	lightblue4	lightblue4
MDM4	steelblue	midnightblue
LOC654230	tan	paleturquoise
SH2D4A	lightgreen	midnightblue
LOC642250	darkorange	darkorange
MB	lightsteelblue1	mediumorchid
DSE	lightpink4	green
LOC642255	mediumpurple3	antiquewhite2
SPG11	coral2	antiquewhite2
DSP	honeydew1	midnightblue
DST	blue	mediumorchid
SH2D3A	lightyellow	midnightblue
VPS37C	brown2	brown2
LOC642236	salmon	coral3
VPS37D	mediumpurple3	antiquewhite2
VPS37A	green	green
VPS37B	palevioletred2	midnightblue
MGC18216	lightpink4	green
MGC4172	turquoise	turquoise
BDP1	coral1	coral3
DTL	white	floralwhite
MGC33846	grey	grey
NP	darkred	antiquewhite2
COL15A1	saddlebrown	midnightblue
LOC654253	sienna3	paleturquoise
HSD17B13	grey	grey
HSD17B12	darkolivegreen2	midnightblue
HSD17B11	coral	coral
HSD17B10	white	floralwhite
RNFT1	palevioletred3	orangered4
SPG3A	brown	mediumorchid
LOC642276	darkolivegreen4	darkolivegreen4
SLITRK6	lightpink4	green
SLITRK5	violet	antiquewhite2
LINGO2	indianred4	mediumorchid
DUT	violet	antiquewhite2
LINGO4	darkgreen	darkgreen
P8	brown	mediumorchid
SPG20	skyblue2	antiquewhite2
LOC654155	royalblue	antiquewhite2
TXNDC10	darkred	antiquewhite2
TXNDC11	cyan	coral3
TXNDC12	darkgrey	coral3
TXNDC13	purple	orangered4
TXNDC14	lightpink3	mediumorchid
TXNDC17	plum2	coral3
MGC45800	paleturquoise	paleturquoise
SLC34A2	darkslateblue	green
MST1R	yellow	paleturquoise
OSGEP	yellow4	navajowhite1
LOC642197	coral1	coral3
LOC642198	sienna4	firebrick4
DYM	coral	coral
LOC654164	paleturquoise	paleturquoise
LOC196120	yellow	paleturquoise
LOC642183	pink	darkgreen
TF	grey	grey
LOC642185	paleturquoise	paleturquoise
PCSK7	lightgreen	midnightblue
LOC654191	skyblue	mediumorchid
PCSK5	darkorange	darkorange
PCSK4	salmon	coral3
CLYBL	greenyellow	coral3
LOC654194	antiquewhite4	coral3
HYAL1	steelblue	midnightblue
HYAL2	grey60	midnightblue
HYAL3	lightslateblue	turquoise
HYAL4	antiquewhite4	coral3
SSSCA1	saddlebrown	midnightblue
LOC654189	maroon	coral3
IGHMBP2	orangered1	antiquewhite2
XK	palevioletred3	orangered4
FLJ10490	yellow3	mediumorchid
GLB1L	black	mediumorchid
LOC390466	salmon	coral3
DKC1	brown	mediumorchid
LOC389457	darkgreen	darkgreen
EBP	darkseagreen4	darkseagreen4
ECD	red	orangered4
PHOX2A	pink	darkgreen
STT3A	purple	orangered4
STT3B	purple	orangered4
MEA1	orange	orange
EED	darkmagenta	coral3
DARS2	indianred4	mediumorchid
ACVR1B	orange	orange
EFS	grey60	midnightblue
MDH1B	black	mediumorchid
ACVR2A	darkmagenta	coral3
PHACS	darkseagreen4	darkseagreen4
EHF	purple	orangered4
RPL30	darkorange	darkorange
RPL32	skyblue	mediumorchid
TMEM200A	grey	grey
FLJ12949	midnightblue	midnightblue
RPL31	darkorange	darkorange
RPL34	antiquewhite4	coral3
ABCA13	skyblue	mediumorchid
GPR175	red	orangered4
RPL36	darkorange	darkorange
RPL35	white	floralwhite
ADNP2	floralwhite	floralwhite
RPL38	magenta	coral3
RPL37	darkolivegreen	orangered4
ANKS1A	skyblue	mediumorchid
RPL39	antiquewhite4	coral3
GPR177	coral2	antiquewhite2
RPL21	salmon	coral3
RPL23	greenyellow	coral3
RPL22	salmon	coral3
MED9	lightcyan1	antiquewhite2
AARSD1	lightgreen	midnightblue
MED4	coral3	coral3
DKK1	mediumpurple3	antiquewhite2
MED6	blue2	antiquewhite2
DKK3	darkturquoise	midnightblue
GPR162	yellowgreen	mediumorchid
GPR160	plum	paleturquoise
RPL24	salmon	coral3
RPL27	antiquewhite4	coral3
RPL26	salmon	coral3
RPL29	tan	paleturquoise
HTATIP	darkgreen	darkgreen
RPL28	grey60	midnightblue
MEG3	saddlebrown	midnightblue
LOC644922	mediumpurple2	mediumpurple2
VPS26A	yellowgreen	mediumorchid
VPS26B	mediumpurple2	mediumpurple2
LOC644919	mediumpurple1	mediumpurple1
RPL41	mediumorchid	mediumorchid
SLC16A12	turquoise	turquoise
SLC16A10	darkred	antiquewhite2
GPR180	lightcoral	mediumorchid
dJ222E13.2	bisque4	orangered4
LOC389316	tan	paleturquoise
SPEF2	orangered3	mediumorchid
ELL	grey	grey
SPEF1	indianred4	mediumorchid
GPR137	mediumorchid	mediumorchid
EMD	coral2	antiquewhite2
ZC3H10	pink	darkgreen
EN2	sienna4	firebrick4
LOC644931	plum3	darkseagreen4
LOC644934	honeydew	midnightblue
LOC644935	plum	paleturquoise
AFTPH	darkslateblue	green
GPR126	honeydew1	midnightblue
ENG	lightpink4	green
PCYOX1	navajowhite2	midnightblue
FLJ46300	paleturquoise	paleturquoise
RPL12	darkorange	darkorange
RPL11	darkgreen	darkgreen
LOC644973	yellow	paleturquoise
RPL14	greenyellow	coral3
LOC389300	thistle3	paleturquoise
RPL13	salmon2	floralwhite
RPL15	bisque4	orangered4
GPR156	firebrick4	firebrick4
RPL18	skyblue	mediumorchid
RPL17	darkorange	darkorange
FLJ46309	antiquewhite4	coral3
RPL19	darkorange	darkorange
CUTL1	green	green
F12	violet	antiquewhite2
NMNAT3	grey60	midnightblue
LOC644952	sienna3	paleturquoise
GPR143	royalblue	antiquewhite2
NMNAT1	pink	darkgreen
MSRB2	blue2	antiquewhite2
COL16A1	darkgrey	coral3
LOC644986	blue	mediumorchid
LOC642333	grey	grey
RNF43	midnightblue	midnightblue
RNF44	honeydew1	midnightblue
F2R	darkgrey	coral3
LOC642312	yellow	paleturquoise
FLJ10357	maroon	coral3
RNF40	lightpink4	green
LOC644979	red	orangered4
MELK	floralwhite	floralwhite
ERF	saddlebrown	midnightblue
ERH	magenta4	antiquewhite2
ABHD4	orangered1	antiquewhite2
ABHD3	red	orangered4
ABHD2	firebrick4	firebrick4
ABHD8	greenyellow	coral3
ABHD6	black	mediumorchid
LOC642347	sienna3	paleturquoise
ABHD5	orangered3	mediumorchid
ABHD9	grey	grey
GPR110	grey	grey
ESD	salmon	coral3
GPR116	grey	grey
GPR114	grey	grey
STRA6	tan	paleturquoise
LOC255025	firebrick4	firebrick4
GPR108	brown4	turquoise
PALB2	grey	grey
LOC642338	floralwhite	floralwhite
LOC642342	pink	darkgreen
GPR101	paleturquoise	paleturquoise
SPERT	grey	grey
GPR103	pink	darkgreen
RNF10	coral3	coral3
CALCOCO1	grey	grey
SFT2D3	pink	darkgreen
RNF13	salmon	coral3
CALCOCO2	tan	paleturquoise
ADRA1B	darkseagreen3	antiquewhite2
RPL7A	lavenderblush2	midnightblue
LOC642373	skyblue1	mediumorchid
LOC654346	grey	grey
LOC727787	pink	darkgreen
PDCD6IP	salmon4	antiquewhite2
RANGAP1	lightsteelblue	antiquewhite2
ADRA2B	saddlebrown	midnightblue
ADRA2A	plum1	plum1
COASY	royalblue	antiquewhite2
EVC	midnightblue	midnightblue
LOC654335	tan	paleturquoise
EVL	purple	orangered4
SSX2IP	red	orangered4
SFT2D1	skyblue3	coral3
RNF31	lightgreen	midnightblue
SMARCD1	lavenderblush3	midnightblue
RNF32	lightpink3	mediumorchid
SMARCD2	midnightblue	midnightblue
RNF34	black	mediumorchid
SMARCD3	sienna4	firebrick4
RNF38	mediumpurple4	orangered4
LOC400214	tan	paleturquoise
ITLN1	turquoise	turquoise
MKI67IP	magenta	coral3
LOC642393	sienna3	paleturquoise
LOC727761	lightcoral	mediumorchid
PUF60	salmon4	antiquewhite2
LOC642399	yellow4	navajowhite1
RNF39	mediumpurple1	mediumpurple1
GCN1L1	darkseagreen3	antiquewhite2
SMARCE1	violet	antiquewhite2
RNF20	greenyellow	coral3
RNF24	darkorange2	green
RNF25	honeydew1	midnightblue
RNF26	midnightblue	midnightblue
PNRC2	salmon	coral3
BET1	turquoise	turquoise
LOC642299	lightsteelblue1	mediumorchid
LOC654260	grey	grey
LOC642282	blue	mediumorchid
AFG3L2	grey60	midnightblue
LOC727751	grey	grey
LOC642287	grey	grey
ANKRA2	darkgrey	coral3
BEX4	cyan	coral3
BEX2	salmon	coral3
BEX1	cyan	coral3
GNG10	magenta	coral3
HIATL1	red	orangered4
FREQ	skyblue2	antiquewhite2
HIST1H3I	darkgreen	darkgreen
GPM6B	lightyellow	midnightblue
HIST1H4K	lightyellow	midnightblue
SLC33A1	orangered4	orangered4
IGFL3	lightpink3	mediumorchid
GNG12	red	orangered4
GNG11	saddlebrown	midnightblue
GIYD1	darkturquoise	midnightblue
CDAN1	turquoise	turquoise
MEIS3P1	violet	antiquewhite2
HIST1H4J	darkgreen	darkgreen
HIST1H4C	orange	orange
ITM2A	salmon	coral3
ITM2B	red	orangered4
BEX5	mediumpurple4	orangered4
ITM2C	grey	grey
ACVRL1	saddlebrown	midnightblue
ANKRD9	white	floralwhite
EPM2AIP1	lightpink4	green
GLIPR1	lightcyan	floralwhite
TNFAIP8L1	skyblue	mediumorchid
TNFAIP8L3	indianred4	mediumorchid
DLAT	skyblue3	coral3
ANKRD6	turquoise	turquoise
RSPRY1	turquoise	turquoise
AVPR1B	sienna3	paleturquoise
STRBP	grey60	midnightblue
RPUSD4	blue	mediumorchid
MDFIC	red	orangered4
RPUSD1	white	floralwhite
RPUSD2	lightsteelblue	antiquewhite2
FRG1	violet	antiquewhite2
RPUSD3	lightyellow	midnightblue
STRAP	magenta	coral3
LOC400174	darkslateblue	green
GAGE12G	sienna3	paleturquoise
AKAP8	coral	coral
AKAP7	steelblue	midnightblue
AKAP6	orange	orange
AKAP3	thistle2	antiquewhite2
AKAP1	skyblue4	paleturquoise
PDZK1IP1	orangered1	antiquewhite2
FAH	darkturquoise	midnightblue
FLJ10374	mediumpurple3	antiquewhite2
FAT	saddlebrown	midnightblue
FAU	darkorange	darkorange
SIRPG	violet	antiquewhite2
FBL	grey60	midnightblue
NUSAP1	white	floralwhite
LOC389365	royalblue	antiquewhite2
SIRPA	navajowhite2	midnightblue
TBCCD1	yellow	paleturquoise
ANGEL2	darkviolet	brown2
ANGEL1	tan	paleturquoise
GLTPD1	steelblue	midnightblue
TBL1XR1	firebrick4	firebrick4
LOC390354	antiquewhite4	coral3
ELMO2	yellow	paleturquoise
ELMO3	lightgreen	midnightblue
FLJ22374	indianred4	mediumorchid
ZC3H18	darkred	antiquewhite2
ZC3H14	red	orangered4
ZC3H15	magenta	coral3
TGFB3	mediumpurple2	mediumpurple2
BFAR	honeydew1	midnightblue
NFKBIA	brown4	turquoise
FER	orangered4	orangered4
DLG2	plum1	plum1
DLG3	green	green
DLG4	yellow3	mediumorchid
FES	pink4	midnightblue
DLG5	sienna4	firebrick4
DLG7	white	floralwhite
TGFBI	honeydew	midnightblue
GRSF1	maroon	coral3
NFKBIE	darkgrey	coral3
DHTKD1	green	green
STS-1	turquoise	turquoise
ZC3H7A	royalblue	antiquewhite2
NFKBIZ	skyblue2	antiquewhite2
HIST1H1C	blue2	antiquewhite2
Magmas	salmon4	antiquewhite2
FGR	lightcyan1	antiquewhite2
PALLD	plum1	plum1
CHMP6	lightcyan1	antiquewhite2
CHMP7	darkturquoise	midnightblue
CHMP5	cyan	coral3
RGS18	skyblue3	coral3
RGS17	lightslateblue	turquoise
RGS19	lightcyan	floralwhite
RGS14	lightblue4	lightblue4
FLJ46380	steelblue	midnightblue
DLL1	orange	orange
STRN4	lavenderblush3	midnightblue
STRN3	red	orangered4
IGFBPL1	lightcyan	floralwhite
LOC390364	grey	grey
LOC390367	paleturquoise	paleturquoise
RGS22	black	mediumorchid
CLASP1	magenta	coral3
CLASP2	salmon4	antiquewhite2
DYX1C1	brown	mediumorchid
DLK2	mediumpurple1	mediumpurple1
RGS10	floralwhite	floralwhite
RGS12	palevioletred3	orangered4
LOC389394	lightsteelblue1	mediumorchid
NOC2L	midnightblue	midnightblue
LOC389641	floralwhite	floralwhite
LOC390637	grey	grey
LDOC1	coral	coral
FRS3	grey	grey
RABL3	darkgrey	coral3
RABL4	black	mediumorchid
RABL5	black	mediumorchid
CDCA3	white	floralwhite
CDCA4	grey60	midnightblue
CDCA5	white	floralwhite
CDCA7	violet	antiquewhite2
CDCA8	violet	antiquewhite2
FUCA1	lightpink4	green
FUCA2	cyan	coral3
LOC642852	lightpink3	mediumorchid
PANX1	darkgrey	coral3
PANX2	plum1	plum1
OLR1	turquoise	turquoise
SPHK2	brown2	brown2
FOS	mediumpurple1	mediumpurple1
HCCA2	pink4	midnightblue
SLC7A4	magenta	coral3
SLC7A5	mediumpurple3	antiquewhite2
SLC7A6	darkseagreen4	darkseagreen4
SLC7A7	darkolivegreen	orangered4
SLC7A8	darkolivegreen4	darkolivegreen4
SLC7A9	yellowgreen	mediumorchid
NUP62CL	indianred4	mediumorchid
ELOF1	grey	grey
DLST	darkturquoise	midnightblue
NOC4L	maroon	coral3
SLC7A1	darkseagreen3	antiquewhite2
SLC7A2	orangered3	mediumorchid
LOC652226	grey	grey
TINP1	salmon	coral3
MFN2	navajowhite2	midnightblue
LOC400506	darkolivegreen	orangered4
FLJ22222	plum1	plum1
LOC642897	tan	paleturquoise
NOC3L	green	green
LOC389672	greenyellow	coral3
FRK	green	green
PLOD3	navajowhite1	navajowhite1
PLOD2	grey	grey
PLOD1	royalblue	antiquewhite2
FRY	blue	mediumorchid
ADORA3	grey60	midnightblue
BNIP3L	red	orangered4
FST	darkturquoise	midnightblue
MFNG	darkred	antiquewhite2
FTL	turquoise	turquoise
COL17A1	grey60	midnightblue
FTO	white	floralwhite
DLX3	ivory	antiquewhite2
CORO1A	thistle1	floralwhite
CORO1B	palevioletred2	midnightblue
LOC652271	pink	darkgreen
CORO1C	blue	mediumorchid
FUK	skyblue3	coral3
FUS	thistle2	antiquewhite2
FLJ10213	turquoise	turquoise
FUZ	black	mediumorchid
CORO2A	blue2	antiquewhite2
CORO2B	yellow	paleturquoise
NDC80	lightcyan	floralwhite
LOC652259	paleturquoise	paleturquoise
LOC652256	paleturquoise	paleturquoise
LOC652290	sienna3	paleturquoise
LOC341651	yellow	paleturquoise
IIP45	pink	darkgreen
COMMD10	darkmagenta	coral3
LOC400566	skyblue	mediumorchid
SYF2	bisque4	orangered4
LOC400578	darkred	antiquewhite2
FYB	thistle1	floralwhite
EHBP1	darkmagenta	coral3
CDC42	coral	coral
FYN	yellow4	navajowhite1
CDC5L	skyblue3	coral3
STUB1	midnightblue	midnightblue
CDC20	violet	antiquewhite2
CDC23	black	mediumorchid
CDC26	ivory	antiquewhite2
ATP6V1E1	violet	antiquewhite2
ATP6V1E2	thistle3	paleturquoise
ATP6V1G1	turquoise	turquoise
CDC40	yellow	paleturquoise
CDC34	pink4	midnightblue
CDC37	lightsteelblue	antiquewhite2
TRIB1	turquoise	turquoise
TRIB2	lightcyan1	antiquewhite2
ZNF324B	darkgreen	darkgreen
OMA1	red	orangered4
CDKN2AIP	maroon	coral3
ATP6V1C1	yellow	paleturquoise
ATP6V1C2	mediumorchid	mediumorchid
CDC16	lightpink3	mediumorchid
SLC2A4RG	blue	mediumorchid
DFNB31	yellow3	mediumorchid
GAA	lightgreen	midnightblue
GAK	darkviolet	brown2
DMC1	turquoise	turquoise
GBA	lightpink4	green
GBL	pink4	midnightblue
NFIL3	darkgreen	darkgreen
GCA	lightgreen	midnightblue
HYPK	turquoise	turquoise
SRP19	darkgrey	coral3
SYS1	blue	mediumorchid
SRP14	red	orangered4
LOC221710	greenyellow	coral3
RPP38	firebrick3	antiquewhite2
RPP21	floralwhite	floralwhite
RPP25	darkturquoise	midnightblue
RPP40	darkorange2	green
GGH	antiquewhite4	coral3
SYT8	plum1	plum1
MANBAL	lightyellow	midnightblue
PSCD2	pink	darkgreen
PSCD1	brown4	turquoise
DMKN	black	mediumorchid
GHR	brown	mediumorchid
SGOL2	darkmagenta	coral3
PSCD4	darkred	antiquewhite2
TGIF1	coral	coral
FLJ46230	turquoise	turquoise
TGIF2	blue	mediumorchid
ATP6V1B2	brown	mediumorchid
ATP6V1B1	grey	grey
FLJ46266	brown	mediumorchid
GK2	darkgreen	darkgreen
GK5	brown2	brown2
SPOCK2	lightblue4	lightblue4
SPOCK1	darkolivegreen4	darkolivegreen4
FAHD1	darkred	antiquewhite2
LOC642817	bisque4	orangered4
FLJ46257	midnightblue	midnightblue
GLA	pink4	midnightblue
LOC389517	turquoise	turquoise
LOC642969	pink	darkgreen
ANKRD20A1	sienna4	firebrick4
GLS	firebrick3	antiquewhite2
CSPP1	skyblue	mediumorchid
AP1S2	thistle1	floralwhite
AP1S1	yellowgreen	mediumorchid
LOC389523	yellow	paleturquoise
SNAG1	green	green
LOC642953	turquoise	turquoise
LOC642960	paleturquoise	paleturquoise
ADPRH	ivory	antiquewhite2
GNE	plum1	plum1
SEH1L	lightcoral	mediumorchid
BXDC5	lightpink4	green
GNS	brown2	brown2
LOC642989	antiquewhite4	coral3
OR5M11	pink	darkgreen
U1SNRNPBP	royalblue	antiquewhite2
LOC652305	lightsteelblue1	mediumorchid
GRTP1	honeydew	midnightblue
GP2	plum1	plum1
GP6	lightsteelblue1	mediumorchid
GP9	antiquewhite4	coral3
H19	lavenderblush3	midnightblue
SNAI2	mediumpurple4	orangered4
GPI	palevioletred2	midnightblue
GPT	turquoise	turquoise
LOC652324	pink	darkgreen
TIMP2	midnightblue	midnightblue
TIMP3	plum3	darkseagreen4
TIMP1	darkolivegreen4	darkolivegreen4
TEAD2	skyblue	mediumorchid
TIMP4	lightpink3	mediumorchid
TEAD3	grey60	midnightblue
TEAD4	violet	antiquewhite2
NUTF2	ivory	antiquewhite2
GCHFR	lavenderblush2	midnightblue
LOC652317	steelblue	midnightblue
BXDC2	plum2	coral3
BXDC1	magenta	coral3
MGLL	orangered3	mediumorchid
GRN	midnightblue	midnightblue
GRP	plum	paleturquoise
TIMM9	darkorange	darkorange
SGMS2	darkred	antiquewhite2
APOLD1	ivory	antiquewhite2
LOC652349	green	green
GPNMB	grey60	midnightblue
GSC	saddlebrown	midnightblue
LOC389541	red	orangered4
GSN	midnightblue	midnightblue
MGMT	coral2	antiquewhite2
GSS	red	orangered4
GSR	turquoise	turquoise
LOC54103	pink	darkgreen
DKFZp761P0423	brown4	turquoise
SCAF1	saddlebrown	midnightblue
ANKRD13C	darkmagenta	coral3
SYAP1	turquoise	turquoise
IL5RA	brown	mediumorchid
RAB43	white	floralwhite
BZRAP1	yellowgreen	mediumorchid
SLC39A9	navajowhite1	navajowhite1
LOC652367	sienna3	paleturquoise
SLC39A6	red	orangered4
KAL1	mediumpurple4	orangered4
SLC39A8	grey	grey
SLC39A7	yellow	paleturquoise
SLC39A1	white	floralwhite
ANKRD13A	greenyellow	coral3
SLC39A3	paleturquoise	paleturquoise
RAB2A	pink	darkgreen
RAB2B	darkviolet	brown2
RAB32	orangered3	mediumorchid
RAB31	cyan	coral3
RAB36	darkorange	darkorange
RAB37	indianred3	indianred3
RAB34	lightyellow	midnightblue
DMWD	turquoise	turquoise
RAB35	blue	mediumorchid
RAB38	skyblue	mediumorchid
MGC33556	yellow3	mediumorchid
RAB5B	coral1	coral3
RAB5C	sienna3	paleturquoise
PCTK2	darkgreen	darkgreen
LOC652388	darkseagreen4	darkseagreen4
RAB6A	turquoise	turquoise
RAB6B	lightcoral	mediumorchid
AP1M2	navajowhite2	midnightblue
AP1M1	antiquewhite2	antiquewhite2
RAB4A	cyan	coral3
RAB4B	salmon	coral3
P4HA1	brown	mediumorchid
P4HA2	salmon2	floralwhite
LOC652377	grey	grey
RAB5A	cyan	coral3
ADPGK	skyblue3	coral3
AP1G2	lightgreen	midnightblue
AP1G1	coral2	antiquewhite2
SLC13A3	lightblue4	lightblue4
SLC13A4	black	mediumorchid
LOC400451	magenta	coral3
RAB1A	grey	grey
RAB1B	midnightblue	midnightblue
LOC400455	darkorange	darkorange
RAB21	salmon	coral3
FBXL20	mediumpurple2	mediumpurple2
RAB20	blue	mediumorchid
MSTO1	green	green
RAB25	lightyellow	midnightblue
RAB26	lightslateblue	turquoise
RAB23	skyblue2	antiquewhite2
RAB24	lightcyan1	antiquewhite2
RAB28	palevioletred3	orangered4
RNGTT	skyblue2	antiquewhite2
FBXL17	paleturquoise	paleturquoise
FBXL15	salmon4	antiquewhite2
FBXL16	darkolivegreen4	darkolivegreen4
FBXL13	blue	mediumorchid
FBXL14	plum1	plum1
RAB10	magenta4	antiquewhite2
FBXL10	skyblue2	antiquewhite2
RAB14	firebrick4	firebrick4
PSAT1	lightcyan	floralwhite
RAB12	green	green
RAB13	mediumpurple3	antiquewhite2
RAB18	saddlebrown	midnightblue
RAB17	sienna4	firebrick4
TNRC6A	darkorange2	green
TNRC6B	darkslateblue	green
PANK4	pink	darkgreen
PANK2	grey60	midnightblue
TRAF3IP3	indianred3	indianred3
PANK3	orangered4	orangered4
VARS	royalblue	antiquewhite2
TRAF3IP2	sienna4	firebrick4
CALML5	steelblue	midnightblue
PANK1	thistle2	antiquewhite2
TRAF3IP1	blue	mediumorchid
CALML3	lavenderblush3	midnightblue
CALML4	brown	mediumorchid
FTH1	thistle3	paleturquoise
LONP1	lightgreen	midnightblue
LONP2	thistle2	antiquewhite2
ATP6V0E1	darkorange2	green
ESCO1	firebrick3	antiquewhite2
TINF2	greenyellow	coral3
AP1B1	ivory	antiquewhite2
KARS	midnightblue	midnightblue
ATP6V0D1	blue	mediumorchid
TNRC15	darkgreen	darkgreen
TWIST1	salmon2	floralwhite
SPHAR	skyblue4	paleturquoise
ATP6V0A2	darkorange	darkorange
ATP6V0A4	plum1	plum1
ATP6V0A1	brown4	turquoise
VASP	navajowhite2	midnightblue
VAT1	midnightblue	midnightblue
Septin 10	cyan	coral3
Septin 11	black	mediumorchid
Septin 12	pink	darkgreen
VASN	saddlebrown	midnightblue
LOC81691	indianred4	mediumorchid
FUBP3	bisque4	orangered4
FUBP1	royalblue	antiquewhite2
COL18A1	saddlebrown	midnightblue
HBB	grey	grey
DNER	skyblue	mediumorchid
GABPA	darkmagenta	coral3
RAB8A	white	floralwhite
RALGPS1	mediumorchid	mediumorchid
RAB8B	darkred	antiquewhite2
VAV3	darkturquoise	midnightblue
RENBP	orangered1	antiquewhite2
VAV2	plum3	darkseagreen4
HCK	orange	orange
CDCP1	magenta	coral3
RAB7B	violet	antiquewhite2
RAB7A	coral1	coral3
HDC	indianred4	mediumorchid
ZNF7	darkolivegreen4	darkolivegreen4
PSMC3IP	blue	mediumorchid
DUOX1	lightpink4	green
UBTD2	magenta	coral3
UBTD1	maroon	coral3
GABRE	orangered1	antiquewhite2
ATP6V0E2	saddlebrown	midnightblue
DUOX2	orangered1	antiquewhite2
GABRP	lavenderblush3	midnightblue
CAPZA1	greenyellow	coral3
CAPZA2	green	green
RAB9A	coral1	coral3
P704P	darkmagenta	coral3
LOC93622	darkred	antiquewhite2
FAIM2	plum1	plum1
FAIM3	grey	grey
TRAPPC2L	purple	orangered4
HGD	plum1	plum1
NANOS3	darkgreen	darkgreen
HGS	cyan	coral3
LOC642904	paleturquoise	paleturquoise
LOC390561	paleturquoise	paleturquoise
SEPSECS	yellowgreen	mediumorchid
HAPLN3	darkturquoise	midnightblue
LOC642921	darkorange2	green
HK2	plum1	plum1
HK1	plum1	plum1
TMPRSS11A	lightyellow	midnightblue
LOC642914	darkgreen	darkgreen
FLJ22167	brown	mediumorchid
AXIN1	darkolivegreen2	midnightblue
AXIN2	brown4	turquoise
TMPRSS11F	yellow	paleturquoise
DNM2	lightgreen	midnightblue
TMPRSS11D	lightyellow	midnightblue
DNM3	skyblue	mediumorchid
TRAPPC6A	red	orangered4
DNLZ	salmon4	antiquewhite2
LOC642947	turquoise	turquoise
HLF	brown	mediumorchid
RNF113A	ivory	antiquewhite2
LEPROTL1	brown	mediumorchid
FLJ22184	turquoise	turquoise
HN1	yellowgreen	mediumorchid
LOC642934	palevioletred3	orangered4
EXOC3L	darkseagreen4	darkseagreen4
LOC390877	sienna3	paleturquoise
LOC642621	plum3	darkseagreen4
LOC642626	darkgreen	darkgreen
HPX	darkslateblue	green
FIGNL1	purple	orangered4
LOC642616	tan	paleturquoise
GPR18	thistle1	floralwhite
HRK	grey	grey
GPR27	black	mediumorchid
LOC400713	lightgreen	midnightblue
SH3BGRL2	magenta	coral3
SH3BGRL3	lightyellow	midnightblue
GPR37	darkmagenta	coral3
LOC400721	turquoise	turquoise
GPR35	thistle2	antiquewhite2
LOC642633	pink	darkgreen
SRPX2	palevioletred2	midnightblue
MICALL1	steelblue	midnightblue
AP2S1	salmon4	antiquewhite2
GPR56	orange	orange
LOC642656	tan	paleturquoise
FAM92A1	coral	coral
HSD17B7P2	bisque4	orangered4
GPR68	thistle1	floralwhite
GPR64	plum3	darkseagreen4
LOC642691	yellow	paleturquoise
SH2D5	green	green
AP2M1	palevioletred2	midnightblue
SLC38A1	brown	mediumorchid
LOC642678	green	green
SLC9A2	darkolivegreen	orangered4
SLC9A4	pink	darkgreen
SLC9A6	coral1	coral3
SLC9A8	steelblue	midnightblue
SLC9A9	skyblue1	mediumorchid
LOC642684	sienna3	paleturquoise
GPR87	floralwhite	floralwhite
GPR83	skyblue2	antiquewhite2
GPR84	honeydew1	midnightblue
SLC9A1	midnightblue	midnightblue
SLC38A7	midnightblue	midnightblue
SLC38A6	paleturquoise	paleturquoise
SLC38A9	pink	darkgreen
SLC38A2	thistle	antiquewhite2
GPR98	blue	mediumorchid
NFKB1	honeydew1	midnightblue
NFKB2	darkturquoise	midnightblue
GNL3L	turquoise	turquoise
UBLCP1	skyblue4	paleturquoise
NFE2L3	floralwhite	floralwhite
NFE2L1	coral1	coral3
NFE2L2	cyan	coral3
LOC389833	orangered4	orangered4
VBP1	plum2	coral3
LOC652044	lightyellow	midnightblue
GIGYF1	antiquewhite2	antiquewhite2
GTF3C1	lightpink4	green
LOC652071	magenta	coral3
GTF3C2	thistle1	floralwhite
GTF3C3	bisque4	orangered4
GTF3C5	darkgrey	coral3
GTF3C6	plum2	coral3
LOC652078	sienna4	firebrick4
LOC652076	tan	paleturquoise
LOC389816	darkgrey	coral3
MICALCL	skyblue	mediumorchid
SH2B3	lightblue4	lightblue4
SH2B1	brown4	turquoise
SLC12A2	maroon	coral3
SLC12A4	navajowhite2	midnightblue
AHCYL2	lightpink4	green
AHCYL1	greenyellow	coral3
FLJ10081	purple	orangered4
SLC12A8	grey	grey
SLC12A9	coral	coral
PAQR8	firebrick3	antiquewhite2
PAQR7	darkgrey	coral3
PAQR4	palevioletred2	midnightblue
PAQR3	darkgrey	coral3
PPP1R3F	sienna3	paleturquoise
PPP1R3C	salmon	coral3
PPP1R3E	grey	grey
PPP1R3D	maroon	coral3
STX1A	lightslateblue	turquoise
L3MBTL3	darkgrey	coral3
L3MBTL2	yellowgreen	mediumorchid
ICK	red	orangered4
ID2	skyblue3	coral3
PPP1R1B	antiquewhite4	coral3
ID1	honeydew1	midnightblue
ID3	honeydew1	midnightblue
PPP1R11	royalblue	antiquewhite2
PPP1R10	skyblue3	coral3
HNF4G	lightcyan1	antiquewhite2
AP2A1	navajowhite2	midnightblue
KIF11	darkmagenta	coral3
IDE	darkgrey	coral3
FLJ46082	brown	mediumorchid
KIF17	darkslateblue	green
AP2A2	skyblue3	coral3
KIF15	greenyellow	coral3
KIF19	yellow3	mediumorchid
IDS	lightpink3	mediumorchid
KIF1C	steelblue	midnightblue
KIF1B	magenta4	antiquewhite2
KIF1A	turquoise	turquoise
NDEL1	blue	mediumorchid
KIF24	orangered3	mediumorchid
MMEL1	lightyellow	midnightblue
KIF27	yellowgreen	mediumorchid
KIF2A	blue	mediumorchid
KIF2C	violet	antiquewhite2
STX12	plum2	coral3
STX16	darkred	antiquewhite2
STX19	blue	mediumorchid
STX18	saddlebrown	midnightblue
STX11	lightsteelblue1	mediumorchid
STX10	lightyellow	midnightblue
MICA	darkgreen	darkgreen
MICB	darkred	antiquewhite2
MIB2	lightyellow	midnightblue
AP2B1	skyblue3	coral3
MIAT	thistle2	antiquewhite2
IGJ	indianred3	indianred3
MIB1	orange	orange
MIDN	saddlebrown	midnightblue
KIF5C	grey	grey
KIF5B	red	orangered4
G6PD	darkturquoise	midnightblue
LOC196549	mediumorchid	mediumorchid
MID1	darkseagreen4	darkseagreen4
DOK4	palevioletred2	midnightblue
DOK6	pink	darkgreen
DOK7	plum3	darkseagreen4
TMED10	red	orangered4
SEL1L	steelblue	midnightblue
PSEN2	salmon2	floralwhite
FUT2	lavenderblush3	midnightblue
FUT4	orangered4	orangered4
FUT3	lavenderblush3	midnightblue
FUT6	darkorange2	green
FUT5	grey	grey
FUT8	yellow	paleturquoise
KIF3B	palevioletred3	orangered4
KIF3C	navajowhite1	navajowhite1
PHF10	darkmagenta	coral3
PHF11	lightcyan	floralwhite
DOLK	green	green
IL8	mediumpurple1	mediumpurple1
IL7	lightsteelblue1	mediumorchid
PHF14	red	orangered4
PHF13	firebrick3	antiquewhite2
PHF16	darkgrey	coral3
PHF15	skyblue3	coral3
PHF17	skyblue	mediumorchid
ILK	lightyellow	midnightblue
PPP1R9A	mediumorchid	mediumorchid
PPP1R9B	lightpink4	green
LMBRD1	red	orangered4
VCAN	mediumpurple1	mediumpurple1
INA	darkseagreen4	darkseagreen4
PDLIM1	lightcoral	mediumorchid
PDLIM5	purple	orangered4
PDLIM7	lightcyan1	antiquewhite2
MBTPS1	violet	antiquewhite2
P117	thistle	antiquewhite2
MAPK15	mediumorchid	mediumorchid
MAPK13	white	floralwhite
MAPK10	blue	mediumorchid
MAPK11	darkturquoise	midnightblue
CHPT1	plum2	coral3
SERPINE2	grey60	midnightblue
IPP	coral3	coral3
DUS4L	plum1	plum1
EARS2	grey	grey
MGC57346	antiquewhite2	antiquewhite2
SERPINF1	grey	grey
SERPINF2	purple	orangered4
LOC642712	tan	paleturquoise
BIN3	turquoise	turquoise
BIN1	lightyellow	midnightblue
SERPING1	darkslateblue	green
YME1L1	red	orangered4
DUS3L	lightgreen	midnightblue
LOC642749	darkseagreen3	antiquewhite2
LOC400657	cyan	coral3
MAPKAP1	magenta4	antiquewhite2
LOC389730	pink	darkgreen
RAD21	antiquewhite2	antiquewhite2
SERPINH1	saddlebrown	midnightblue
DUS2L	lightcyan1	antiquewhite2
TRIP4	red	orangered4
LOC642733	pink	darkgreen
LOC642740	mediumpurple2	mediumpurple2
TRIP6	lavenderblush3	midnightblue
SERPINI2	yellow3	mediumorchid
SERPINI1	plum	paleturquoise
DUS1L	palevioletred2	midnightblue
SERPINA3	antiquewhite4	coral3
ITK	thistle1	floralwhite
SERPINA1	darkseagreen4	darkseagreen4
SPIN4	mediumpurple3	antiquewhite2
SPIN3	pink	darkgreen
SRP54	red	orangered4
C14orf172	royalblue	antiquewhite2
C14orf179	skyblue1	mediumorchid
TRIM8	lavenderblush2	midnightblue
TRIM6	lightcoral	mediumorchid
TRIM7	lightyellow	midnightblue
CSRP2	darkolivegreen4	darkolivegreen4
CSRP1	lavenderblush3	midnightblue
TRIM4	grey	grey
TRIM5	yellowgreen	mediumorchid
TRIM2	thistle3	paleturquoise
LOC642773	sienna3	paleturquoise
C14orf173	lightcyan1	antiquewhite2
TRIM3	lightpink3	mediumorchid
SPIN1	blue2	antiquewhite2
AP3S2	grey	grey
AP3S1	salmon	coral3
SERPINB3	grey	grey
SERPINB4	coral3	coral3
SERPINB1	salmon	coral3
SERPINB2	floralwhite	floralwhite
FCRL5	tan	paleturquoise
ITPK1	lightcyan1	antiquewhite2
SERPINB9	darkgreen	darkgreen
LOC642755	salmon2	floralwhite
NUDT16L1	orange	orange
SERPINB7	grey	grey
SERPINB8	white	floralwhite
SERPINB5	honeydew	midnightblue
SERPINB6	lightcoral	mediumorchid
ITPKB	midnightblue	midnightblue
C14orf169	darkred	antiquewhite2
ITPKC	yellow	paleturquoise
C14orf166	salmon	coral3
IVD	grey	grey
ITPKA	blue	mediumorchid
LOC642761	paleturquoise	paleturquoise
NAPRT1	lavenderblush3	midnightblue
CHRNG	darkgreen	darkgreen
SRP72	mediumpurple3	antiquewhite2
LOC123688	turquoise	turquoise
LOC389787	antiquewhite4	coral3
GTF2H1	sienna3	paleturquoise
LOC642776	sienna4	firebrick4
SRP68	maroon	coral3
GTF2H3	orangered4	orangered4
GTF2H4	pink4	midnightblue
GTF2H5	coral	coral
LOC389791	brown4	turquoise
SEMA5A	darkolivegreen	orangered4
LOC652128	paleturquoise	paleturquoise
IYD	mediumpurple2	mediumpurple2
MGC59937	lightcyan1	antiquewhite2
TECTA	grey	grey
TPD52	thistle	antiquewhite2
BIVM	maroon	coral3
SEMA6A	brown	mediumorchid
GTF2F1	lavenderblush3	midnightblue
GTF2F2	salmon2	floralwhite
LOC652115	darkseagreen4	darkseagreen4
XIST	turquoise	turquoise
ANKRD36B	sienna4	firebrick4
SEMA7A	pink	darkgreen
ITPR1	lavenderblush2	midnightblue
RHOBTB3	darkolivegreen4	darkolivegreen4
ITPR2	darkseagreen4	darkseagreen4
ITPR3	coral	coral
VTCN1	grey60	midnightblue
LOC652153	darkturquoise	midnightblue
LOC652152	darkgreen	darkgreen
GTF2E1	salmon4	antiquewhite2
GTF2E2	coral2	antiquewhite2
SLC37A1	grey	grey
NSFL1C	magenta	coral3
RAD9A	mediumorchid	mediumorchid
LOC390705	lightblue4	lightblue4
DNALI1	skyblue	mediumorchid
OPA1	yellow	paleturquoise
OPA3	lightsteelblue1	mediumorchid
HYDIN	orangered3	mediumorchid
SLC37A4	darkolivegreen2	midnightblue
SLC37A3	palevioletred3	orangered4
LOC389722	orangered4	orangered4
PAPD4	darkmagenta	coral3
PAPD1	honeydew	midnightblue
LOC652163	darkred	antiquewhite2
LOC652161	yellow	paleturquoise
NIPSNAP1	navajowhite2	midnightblue
PTP4A1	salmon4	antiquewhite2
PTP4A2	turquoise	turquoise
PAPD5	darkgreen	darkgreen
GTF2A2	darkviolet	brown2
SEMA3C	skyblue	mediumorchid
SEMA3A	palevioletred3	orangered4
SEMA3E	turquoise	turquoise
SEMA3F	lightgreen	midnightblue
AP3M2	darkorange	darkorange
AP3M1	bisque4	orangered4
SEMA4A	brown	mediumorchid
SEMA4D	brown4	turquoise
ANKRD30B	turquoise	turquoise
SEMA4B	brown4	turquoise
ADRM1	sienna3	paleturquoise
SEMA4C	thistle2	antiquewhite2
SEMA4F	yellow4	navajowhite1
CFLAR	skyblue3	coral3
CDC42BPB	darkorange2	green
MIZF	blue	mediumorchid
CDC42BPA	lightcyan1	antiquewhite2
LOC652184	palevioletred3	orangered4
TRIT1	lightgreen	midnightblue
TPCN2	cyan	coral3
LOC652183	honeydew1	midnightblue
TPCN1	steelblue	midnightblue
RAD50	yellow	paleturquoise
RAD51	coral1	coral3
SYCP3	firebrick4	firebrick4
DPF1	black	mediumorchid
DPF2	darkorange2	green
TIPIN	floralwhite	floralwhite
SLC11A2	darkorange	darkorange
BOLA1	mediumorchid	mediumorchid
TCERG1L	sienna4	firebrick4
BOLA3	coral1	coral3
GRWD1	pink4	midnightblue
BOLA2	lavenderblush2	midnightblue
WASPIP	skyblue3	coral3
PTDSS2	midnightblue	midnightblue
PTDSS1	honeydew1	midnightblue
SGPL1	lightpink4	green
DPH2	white	floralwhite
DPH3	coral1	coral3
DPH4	indianred3	indianred3
DPH5	magenta	coral3
OSTalpha	pink	darkgreen
SRPK1	violet	antiquewhite2
SESTD1	red	orangered4
DAZAP2	palevioletred3	orangered4
DAZAP1	lightgreen	midnightblue
AP3B1	red	orangered4
AP3B2	grey	grey
CEACAM1	darkred	antiquewhite2
CEACAM6	saddlebrown	midnightblue
CEACAM5	midnightblue	midnightblue
PAPLN	darkgreen	darkgreen
HRSP12	cyan	coral3
ANKMY2	lightgreen	midnightblue
ANKMY1	yellowgreen	mediumorchid
C1GALT1	darkslateblue	green
AP3D1	green	green
ZNF354A	darkgreen	darkgreen
RAB3GAP1	orange	orange
ZNF354B	sienna3	paleturquoise
FVT1	brown4	turquoise
C14orf135	skyblue	mediumorchid
C14orf133	lavenderblush3	midnightblue
C14orf131	yellowgreen	mediumorchid
C14orf132	yellow3	mediumorchid
C14orf130	darkolivegreen	orangered4
MGC87042	darkolivegreen4	darkolivegreen4
DPM1	cyan	coral3
C14orf124	darkseagreen4	darkseagreen4
DPM2	blue	mediumorchid
DPM3	pink	darkgreen
C14orf122	skyblue2	antiquewhite2
TIPRL	skyblue4	paleturquoise
C14orf129	skyblue4	paleturquoise
C14orf126	purple	orangered4
ADRB1	purple	orangered4
ADRB2	darkorange	darkorange
DPP3	lavenderblush3	midnightblue
DPP7	bisque4	orangered4
C14orf156	magenta	coral3
DPP8	purple	orangered4
C14orf153	turquoise	turquoise
DPP9	lightgreen	midnightblue
C14orf152	lightpink3	mediumorchid
C10orf104	lightyellow	midnightblue
C10orf107	brown	mediumorchid
C14orf159	steelblue	midnightblue
OPN3	bisque4	orangered4
C14orf147	salmon	coral3
C14orf145	lightpink4	green
C14orf142	brown	mediumorchid
C14orf143	brown4	turquoise
C10orf119	ivory	antiquewhite2
C14orf140	indianred4	mediumorchid
C10orf116	grey60	midnightblue
SRPRB	lightcyan1	antiquewhite2
C10orf115	grey60	midnightblue
C10orf118	sienna4	firebrick4
C10orf111	grey60	midnightblue
BDKRB2	midnightblue	midnightblue
C10orf128	orangered1	antiquewhite2
C10orf125	lightyellow	midnightblue
C10orf137	mediumpurple3	antiquewhite2
C14orf112	brown2	brown2
C14orf119	royalblue	antiquewhite2
REPS1	green	green
RWDD1	magenta	coral3
RWDD3	yellow	paleturquoise
SGPP2	orange	orange
C14orf102	turquoise	turquoise
C14orf100	lightsteelblue1	mediumorchid
C14orf101	paleturquoise	paleturquoise
XPNPEP1	orangered1	antiquewhite2
XPNPEP2	darkslateblue	green
XPNPEP3	darkgrey	coral3
C14orf108	darkgrey	coral3
C14orf106	royalblue	antiquewhite2
C14orf104	lightsteelblue1	mediumorchid
ITSN1	steelblue	midnightblue
ANKFY1	darkorange2	green
HEMK1	turquoise	turquoise
CXADR	coral2	antiquewhite2
LOC613037	darkgrey	coral3
LOC652634	maroon	coral3
MTHFD1	lightcyan	floralwhite
MTHFD2	greenyellow	coral3
EWSR1	royalblue	antiquewhite2
JTB	thistle3	paleturquoise
OPTN	green	green
LOC652672	plum1	plum1
LOC649025	sienna3	paleturquoise
NPBWR2	pink	darkgreen
LOC652663	sienna3	paleturquoise
LOC649021	green	green
MGC16703	darkgrey	coral3
LTA4H	darkolivegreen	orangered4
LOC650009	darkseagreen4	darkseagreen4
HLA-DRB6	grey	grey
JUN	mediumpurple1	mediumpurple1
HLA-DRB5	lightblue4	lightblue4
HLA-DRB4	lightblue4	lightblue4
JUP	midnightblue	midnightblue
EIF2AK1	greenyellow	coral3
EIF2AK3	grey	grey
EIF2AK2	darkred	antiquewhite2
EIF2AK4	turquoise	turquoise
LOC652659	sienna3	paleturquoise
HLA-DRB3	lightblue4	lightblue4
HLA-DRB1	grey	grey
LOC652694	thistle1	floralwhite
TFCP2L1	darkolivegreen	orangered4
LOC400958	navajowhite1	navajowhite1
LOC650029	lightgreen	midnightblue
LOC649049	darkorange	darkorange
LOC652685	darkseagreen3	antiquewhite2
CHST9	blue	mediumorchid
DUSP5	pink4	midnightblue
CHST6	yellow3	mediumorchid
DUSP3	darkseagreen3	antiquewhite2
CHST7	lightcyan1	antiquewhite2
LOC400963	lavenderblush2	midnightblue
DUSP1	mediumpurple1	mediumpurple1
DUSP8	steelblue	midnightblue
DUSP9	plum	paleturquoise
DUSP6	ivory	antiquewhite2
LOC652675	tan	paleturquoise
DPYD	red	orangered4
CHST4	darkorange	darkorange
LOC649030	tan	paleturquoise
CHST3	darkslateblue	green
ATAD1	red	orangered4
ATAD4	plum3	darkseagreen4
LOC400986	darkturquoise	midnightblue
ATAD2	bisque4	orangered4
LOC650034	mediumpurple2	mediumpurple2
EFEMP2	salmon4	antiquewhite2
EFEMP1	purple	orangered4
LOC649088	honeydew1	midnightblue
UGT2B11	grey	grey
PCYT2	bisque4	orangered4
UGT2B17	darkred	antiquewhite2
PTPRCAP	lightcyan	floralwhite
LOC649075	tan	paleturquoise
LOC650087	pink	darkgreen
INADL	lightslateblue	turquoise
CLPTM1L	darkorange2	green
LOC649095	lightcoral	mediumorchid
AP4M1	darkmagenta	coral3
NKX3-1	darkgrey	coral3
MTHFSD	navajowhite1	navajowhite1
E2F1	paleturquoise	paleturquoise
E2F2	violet	antiquewhite2
E2F3	royalblue	antiquewhite2
E2F4	white	floralwhite
E2F5	plum	paleturquoise
E2F6	palevioletred3	orangered4
E2F7	violet	antiquewhite2
ICAM2	pink4	midnightblue
ICAM3	coral2	antiquewhite2
IKZF1	darkred	antiquewhite2
IKZF4	pink	darkgreen
IKZF5	plum2	coral3
PI4KAP1	green	green
PI4KAP2	lavenderblush3	midnightblue
LOC554203	yellow	paleturquoise
TMEM63A	mediumorchid	mediumorchid
TMEM63B	saddlebrown	midnightblue
LOC554208	skyblue2	antiquewhite2
LOC554206	skyblue4	paleturquoise
BRI3BP	saddlebrown	midnightblue
FLJ20920	brown4	turquoise
MON1B	tan	paleturquoise
TRSPAP1	lightsteelblue1	mediumorchid
AP4E1	red	orangered4
UIMC1	salmon4	antiquewhite2
PHGDH	lightpink4	green
KIT	darkolivegreen	orangered4
KIAA1324L	grey	grey
SGSM1	turquoise	turquoise
SGSM3	maroon	coral3
SGSM2	brown4	turquoise
PRKCABP	green	green
FAM3B	honeydew	midnightblue
FAM3A	darkolivegreen2	midnightblue
FAM3D	darkturquoise	midnightblue
FAM3C	bisque4	orangered4
ACOT11	lightcyan1	antiquewhite2
CCNB1IP1	grey60	midnightblue
TYROBP	lightcyan	floralwhite
TSG101	cyan	coral3
FAM90A12	coral2	antiquewhite2
AP4B1	coral	coral
LOC400948	brown2	brown2
LMNB2	darkturquoise	midnightblue
LTB4R	navajowhite2	midnightblue
LOC196752	lightsteelblue	antiquewhite2
LMNB1	darkmagenta	coral3
LOC652608	yellow4	navajowhite1
LOC652607	tan	paleturquoise
MKL2	mediumpurple1	mediumpurple1
MKKS	grey60	midnightblue
MKL1	lightgreen	midnightblue
NT5C2	darkolivegreen2	midnightblue
NT5C3	brown	mediumorchid
LOC652624	darkorange	darkorange
YY1AP1	navajowhite2	midnightblue
COL7A1	darkturquoise	midnightblue
LOC652616	tan	paleturquoise
WDR86	lightpink3	mediumorchid
LOC652767	green	green
WDR92	indianred4	mediumorchid
WDR93	lightcoral	mediumorchid
LOC652764	sienna3	paleturquoise
WDR90	salmon	coral3
WDR91	darkolivegreen	orangered4
LOC652762	blue	mediumorchid
WDR74	turquoise	turquoise
WDR75	darkred	antiquewhite2
WDR72	thistle3	paleturquoise
WDR73	indianred4	mediumorchid
WDR78	grey60	midnightblue
HCFC2	grey	grey
WDR79	indianred4	mediumorchid
HCFC1	brown4	turquoise
WDR77	green	green
LOC652755	turquoise	turquoise
WDR81	brown4	turquoise
WDR82	midnightblue	midnightblue
LOC652753	paleturquoise	paleturquoise
LOC400891	black	mediumorchid
LOC400890	midnightblue	midnightblue
WDR69	brown	mediumorchid
WDR63	lightpink3	mediumorchid
WDR61	cyan	coral3
WDR67	black	mediumorchid
WDR68	midnightblue	midnightblue
WDR66	yellow3	mediumorchid
XKRX	darkolivegreen4	darkolivegreen4
LOC650128	turquoise	turquoise
WDR70	pink4	midnightblue
BLOC1S1	lightyellow	midnightblue
LOC649143	skyblue	mediumorchid
LOC649144	yellow	paleturquoise
HLA-DQA1	lightblue4	lightblue4
WDR59	mediumpurple3	antiquewhite2
WDR52	green	green
WDR53	purple	orangered4
WDR57	magenta	coral3
WDR54	lightpink3	mediumorchid
WDR55	lavenderblush2	midnightblue
LOC649139	yellow	paleturquoise
WDR60	skyblue	mediumorchid
LOC652773	purple	orangered4
MKS1	skyblue	mediumorchid
WDR5B	mediumpurple2	mediumpurple2
WDR49	brown	mediumorchid
FANK1	black	mediumorchid
FXC1	mediumpurple2	mediumpurple2
WDR47	palevioletred3	orangered4
WDR48	grey	grey
LOC400831	coral2	antiquewhite2
PHF20	darkgreen	darkgreen
PHF23	royalblue	antiquewhite2
PFAAP5	mediumpurple4	orangered4
WDR41	darkred	antiquewhite2
LOC650152	royalblue	antiquewhite2
WDR45	purple	orangered4
WDR46	lightgreen	midnightblue
WDR43	orangered4	orangered4
LOC649169	darkseagreen4	darkseagreen4
WDR38	lightcoral	mediumorchid
HELLS	floralwhite	floralwhite
WDR36	black	mediumorchid
WDR37	steelblue	midnightblue
WDR31	blue	mediumorchid
LOC650140	tan	paleturquoise
WDR34	black	mediumorchid
WDR35	blue	mediumorchid
WDR33	lightcoral	mediumorchid
KIFC2	lightslateblue	turquoise
KIFC1	white	floralwhite
LOC649150	purple	orangered4
HLA-DQB2	turquoise	turquoise
HLA-DQB1	lightblue4	lightblue4
WDR27	mediumorchid	mediumorchid
WDR25	thistle2	antiquewhite2
WDR26	coral2	antiquewhite2
WDR20	grey60	midnightblue
WDR23	pink	darkgreen
WDR24	plum2	coral3
WDR22	yellowgreen	mediumorchid
LOC649186	paleturquoise	paleturquoise
WDR16	brown	mediumorchid
WDR18	salmon4	antiquewhite2
WDR19	skyblue	mediumorchid
FLJ42177	yellowgreen	mediumorchid
WDR12	plum2	coral3
WDR13	turquoise	turquoise
PHF5A	coral2	antiquewhite2
IGLL3	thistle1	floralwhite
IGLL1	thistle1	floralwhite
N6AMT1	bisque4	orangered4
N6AMT2	skyblue1	mediumorchid
PARK7	coral	coral
LOC650188	saddlebrown	midnightblue
DRAM	grey	grey
IFNAR2	black	mediumorchid
LOC650185	sienna3	paleturquoise
IFNAR1	brown2	brown2
TTRAP	skyblue4	paleturquoise
SLC38A11	darkturquoise	midnightblue
DRD4	turquoise	turquoise
LOC389901	paleturquoise	paleturquoise
OSBPL9	bisque4	orangered4
FANCI	floralwhite	floralwhite
OSBPL8	darkslateblue	green
UVRAG	orangered4	orangered4
OSBPL7	brown4	turquoise
OSBPL6	skyblue	mediumorchid
OSBPL5	turquoise	turquoise
FANCL	darkmagenta	coral3
OSBPL3	white	floralwhite
OSBPL2	yellow	paleturquoise
FANCE	brown	mediumorchid
FANCG	mediumpurple3	antiquewhite2
FANCF	lightsteelblue1	mediumorchid
MAP3K13	lightyellow	midnightblue
MAP3K14	mediumpurple2	mediumpurple2
MAP3K11	palevioletred2	midnightblue
BCL2L2	purple	orangered4
BCL2L1	grey60	midnightblue
MAP3K12	turquoise	turquoise
RPRC1	lightcyan1	antiquewhite2
LBH	green	green
PHACTR3	floralwhite	floralwhite
PHACTR2	lavenderblush2	midnightblue
PHACTR4	orange	orange
CKAP2L	floralwhite	floralwhite
PLRG1	turquoise	turquoise
DNAJC3	ivory	antiquewhite2
DNAJC7	green	green
DNAJC5	salmon2	floralwhite
DNAJC4	salmon2	floralwhite
DNAJC9	floralwhite	floralwhite
DNAJC8	darkred	antiquewhite2
DNAJB2	mediumorchid	mediumorchid
UBXD5	yellow3	mediumorchid
DNAJB1	lightpink4	green
UBXD8	firebrick3	antiquewhite2
DNAJB6	red	orangered4
UBXD2	royalblue	antiquewhite2
LOC375323	yellow4	navajowhite1
UBXD1	lightyellow	midnightblue
DNAJB4	thistle3	paleturquoise
UBXD4	greenyellow	coral3
UBXD3	yellowgreen	mediumorchid
DNAJB9	plum1	plum1
DRGX	green	green
DNAJA1	lightgreen	midnightblue
DNAJA4	blue	mediumorchid
DNAJA3	black	mediumorchid
LEP	turquoise	turquoise
DNAJA2	royalblue	antiquewhite2
DRG1	magenta	coral3
DRG2	royalblue	antiquewhite2
HCG22	sienna3	paleturquoise
IFITM3	lightcyan	floralwhite
VEZT	thistle	antiquewhite2
IFITM1	lightcyan	floralwhite
IFITM2	lightcyan	floralwhite
PARS2	sienna4	firebrick4
HS6ST1	steelblue	midnightblue
HS6ST2	bisque4	orangered4
RPS15	darkorange	darkorange
RPS14	darkorange	darkorange
RPS17	magenta	coral3
RPS16	greenyellow	coral3
RPS19	skyblue	mediumorchid
RPS18	salmon2	floralwhite
PART1	lightcyan	floralwhite
RPS11	darkorange	darkorange
RPS10	salmon2	floralwhite
IFITM5	darkturquoise	midnightblue
RPS13	darkorange	darkorange
RPS12	darkorange	darkorange
SRRM2	turquoise	turquoise
HLA-H	lightblue4	lightblue4
HLA-B	lightblue4	lightblue4
HLA-C	darkseagreen4	darkseagreen4
HLA-A	darkorange	darkorange
HLA-F	thistle1	floralwhite
HLA-G	white	floralwhite
HLA-E	lightcyan	floralwhite
SRRM1	skyblue3	coral3
WBSCR18	turquoise	turquoise
MTHFD2L	skyblue2	antiquewhite2
LOC253012	thistle3	paleturquoise
CSTF3	lightsteelblue1	mediumorchid
CSTF2	darkred	antiquewhite2
FXR1	lightyellow	midnightblue
WBSCR28	darkseagreen4	darkseagreen4
SCFD1	cyan	coral3
FXR2	royalblue	antiquewhite2
WBSCR27	black	mediumorchid
HNRPA1L-2	darkorange	darkorange
WBSCR22	lightcoral	mediumorchid
PARVA	blue	mediumorchid
RPS26	honeydew	midnightblue
RPS25	salmon	coral3
RPS28	greenyellow	coral3
RPS27	magenta	coral3
PARVG	lightcyan	floralwhite
RPS29	greenyellow	coral3
RPS20	brown2	brown2
RPS21	greenyellow	coral3
RPS24	pink	darkgreen
RPS23	mediumpurple4	orangered4
AHCTF1	skyblue	mediumorchid
PARP3	lightcyan	floralwhite
PARP4	bisque4	orangered4
PARP1	mediumpurple3	antiquewhite2
PARP2	greenyellow	coral3
PARP9	lightcyan	floralwhite
MLF1	brown	mediumorchid
PARP8	pink	darkgreen
MLF2	midnightblue	midnightblue
ICA1L	blue	mediumorchid
AMIGO1	navajowhite2	midnightblue
MTHFD1L	honeydew	midnightblue
RPRML	plum	paleturquoise
MLH1	palevioletred3	orangered4
DOCK10	skyblue3	coral3
DOCK11	palevioletred3	orangered4
LOX	firebrick4	firebrick4
LPP	brown4	turquoise
LOC652703	tan	paleturquoise
CDH26	grey	grey
MLL2	sienna4	firebrick4
MLL4	darkorange2	green
MLL5	orange	orange
BLMH	thistle2	antiquewhite2
GPSM1	saddlebrown	midnightblue
GPSM2	salmon	coral3
ASNSD1	skyblue3	coral3
MFSD8	maroon	coral3
RPS4X	salmon	coral3
MFSD7	lightgreen	midnightblue
MFSD4	palevioletred3	orangered4
LOC652721	tan	paleturquoise
MFSD5	thistle2	antiquewhite2
MFSD2	yellow4	navajowhite1
MFSD3	mediumpurple3	antiquewhite2
MFSD1	lightcyan	floralwhite
TOPBP1	darkred	antiquewhite2
GPSM3	darkgreen	darkgreen
BTBD14A	purple	orangered4
LOC652726	navajowhite2	midnightblue
GPSN2	green	green
LSR	midnightblue	midnightblue
RPS3A	antiquewhite4	coral3
LSS	blue	mediumorchid
FCHSD2	darkseagreen3	antiquewhite2
DDAH1	black	mediumorchid
DDAH2	ivory	antiquewhite2
CDH11	mediumpurple3	antiquewhite2
COL6A1	midnightblue	midnightblue
LTA	green	green
CDH12	skyblue1	mediumorchid
COL6A3	saddlebrown	midnightblue
TERF2IP	royalblue	antiquewhite2
CDH13	honeydew1	midnightblue
LTB	green	green
LTK	sienna3	paleturquoise
CHSY1	darkred	antiquewhite2
CHSY3	navajowhite2	midnightblue
LOC255620	yellow3	mediumorchid
MLPH	mediumorchid	mediumorchid
USP6NL	red	orangered4
FLJ20699	royalblue	antiquewhite2
GABARAPL2	coral	coral
STARD3	thistle2	antiquewhite2
GABARAPL1	lightpink4	green
STARD5	white	floralwhite
STARD7	black	mediumorchid
STARD8	sienna4	firebrick4
DNTTIP1	coral1	coral3
CLNS1A	salmon	coral3
LXN	darkolivegreen2	midnightblue
LOC387683	navajowhite1	navajowhite1
PPARGC1A	darkviolet	brown2
PPARGC1B	steelblue	midnightblue
VTI1B	tan	paleturquoise
LYN	orangered1	antiquewhite2
LYZ	greenyellow	coral3
LOC652416	darkslateblue	green
PQBP1	yellowgreen	mediumorchid
FLVCR1	ivory	antiquewhite2
FLVCR2	orangered1	antiquewhite2
HLA-DPA1	lightblue4	lightblue4
MDP-1	coral1	coral3
NSUN4	thistle	antiquewhite2
NSUN5	skyblue3	coral3
NSUN2	black	mediumorchid
NSUN3	black	mediumorchid
LOC652441	sienna3	paleturquoise
NSUN6	steelblue	midnightblue
LOC255809	darkgreen	darkgreen
NSUN7	orangered3	mediumorchid
DYNLL1	lightsteelblue1	mediumorchid
DYNLL2	white	floralwhite
STYXL1	blue	mediumorchid
LOC652469	sienna3	paleturquoise
HLA-DPB1	lightcyan	floralwhite
CXCL17	greenyellow	coral3
LOC652493	indianred3	indianred3
CXCL14	floralwhite	floralwhite
LOC652492	darkgrey	coral3
CXCL16	coral	coral
LOC652489	salmon	coral3
OSBP	skyblue	mediumorchid
LOC652481	red	orangered4
MLZE	mediumpurple3	antiquewhite2
FLJ20628	darkgrey	coral3
[truncated: 10,581 more rows]
